# Supplementary material for: Age-Dependent Variations in Functional Quality and Proteomic Characteristics of Canine (Canis lupus familiaris) Epididymal Spermatozoa
Source: MDPI journal article supplement (doi:10.3390/ijms23169143), 2022-08-15
Supplement: s1 [file s1]

**Table S3** Supplementary. Proteins of Group 3 (78 to 132 months old) dog (*Canis lupus familiaris*) epididymal spermatozoa evaluated by mass spectrometry (NanoUPLC-Q-TOF/MS).

| Description                                                                                                                                  | Log Prob | Best  Log Prob | Best score | Total Intensity | # of spectra | # of unique peptides | # of mod peptides | Coverage % | # AA's in protein | Protein DB number |
|----------------------------------------------------------------------------------------------------------------------------------------------|----------|----------------|------------|-----------------|--------------|----------------------|-------------------|------------|-------------------|-------------------|
| >tr A0A5F4BVF3 A0A5F4BVF3_CANLF Lactotransferrin OS=Canis lupus familiaris OX=9615 GN=LTF PE=3 SV=1                                          | 8.24     | 2.47           | 289.50     | 708660872.9     | 51           | 8                    | 0                 | 7.99       | 626               | 32850             |
| >tr A0A5F4BVF3 A0A5F4BVF3_CANLF Lactotransferrin OS=Canis lupus familiaris OX=9615 GN=LTF PE=3 SV=1                                          | 16.39    | 4.76           | 391.20     | 692545448.9     | 87           | 13                   | 0                 | 17.25      | 626               | 32850             |
| >tr F1PR54 F1PR54_CANLF Lactotransferrin OS=Canis lupus familiaris OX=9615 GN=LTF PE=3 SV=1                                                  | 20.54    | 4.06           | 423.00     | 652964790.4     | 92           | 17                   | 1                 | 22.46      | 708               | 40436             |
| >sp P62286 ASPM_CANLF Abnormal spindle-like microcephaly-associated protein homolog OS=Canis lupus familiaris OX=9615 GN=ASPM PE=2 SV=2      | 0.25     | 0.15           | 86.60      | 605260377.9     | 67           | 3                    | 0                 | 0.29       | 3469              | 677               |
| >sp Q697L1 TRPV1_CANLF Transient receptor potential cation channel subfamily V member 1 OS=Canis lupus familiaris OX=9615 GN=TRPV1 PE=2 SV=1 | 2.18     | 0.16           | 115.70     | 587367198.5     | 118          | 3                    | 2                 | 0.71       | 840               | 297               |
| >sp Q697L1 TRPV1_CANLF Transient receptor potential cation channel subfamily V member 1 OS=Canis lupus familiaris OX=9615 GN=TRPV1 PE=2 SV=1 | 1.94     | 0.10           | 118.50     | 581120430.2     | 112          | 3                    | 2                 | 0.71       | 840               | 297               |
| >tr F1PR54 F1PR54_CANLF Lactotransferrin OS=Canis lupus familiaris OX=9615 GN=LTF PE=3 SV=1                                                  | 23.56    | 4.15           | 274.10     | 575486227.0     | 90           | 14                   | 1                 | 22.03      | 708               | 40436             |
| >tr F1PJ71 F1PJ71_CANLF Glutathione peroxidase OS=Canis lupus familiaris OX=9615 GN=GPX5 PE=3 SV=2                                           | 11.93    | 3.79           | 293.40     | 558589605.0     | 68           | 8                    | 1                 | 30.32      | 221               | 19009             |
| >sp E2RKA8 RL32_CANLF 60S ribosomal protein L32 OS=Canis lupus familiaris OX=9615 GN=RPL32 PE=1 SV=1                                         | 3.52     | 0.59           | 116.90     | 555722532.7     | 133          | 2                    | 0                 | 4.44       | 135               | 275               |
| >tr A0A5F4BVF3 A0A5F4BVF3_CANLF Lactotransferrin OS=Canis lupus familiaris OX=9615 GN=LTF PE=3 SV=1                                          | 17.44    | 2.38           | 424.60     | 448583852.7     | 100          | 16                   | 2                 | 24.76      | 626               | 32850             |
| >sp Q9XS65 PTGDS_CANLF Prostaglandin-H2 D-isomerase OS=Canis lupus familiaris OX=9615 GN=PTGDS PE=2 SV=1                                     | 5.28     | 2.20           | 294.90     | 434245415.3     | 55           | 6                    | 1                 | 24.08      | 191               | 165               |
| >tr F1PJ71 F1PJ71_CANLF Glutathione peroxidase OS=Canis lupus familiaris OX=9615 GN=GPX5 PE=3 SV=2                                           | 13.01    | 2.06           | 361.60     | 429116073.1     | 65           | 8                    | 1                 | 31.67      | 221               | 19009             |
| >sp Q9XS65 PTGDS_CANLF Prostaglandin-H2 D-isomerase OS=Canis lupus familiaris OX=9615 GN=PTGDS PE=2 SV=1                                     | 6.06     | 1.48           | 395.20     | 359426817.2     | 53           | 7                    | 1                 | 18.85      | 191               | 165               |
| >sp P62286 ASPM_CANLF Abnormal spindle-like microcephaly-associated protein homolog OS=Canis lupus familiaris OX=9615 GN=ASPM PE=2 SV=2      | 2.34     | 0.21           | 103.00     | 349492154.5     | 94           | 3                    | 0                 | 0.23       | 3469              | 677               |
| >sp P62286 ASPM_CANLF Abnormal spindle-like microcephaly-associated protein homolog OS=Canis lupus familiaris OX=9615 GN=ASPM PE=2 SV=2      | 1.76     | 0.33           | 125.40     | 349134726.5     | 60           | 3                    | 0                 | 0.23       | 3469              | 677               |
| >sp Q9XS65 PTGDS_CANLF Prostaglandin-H2 D-isomerase OS=Canis lupus familiaris OX=9615 GN=PTGDS PE=2 SV=1                                     | 6.02     | 2.27           | 354.50     | 329937435.5     | 35           | 3                    | 1                 | 10.47      | 191               | 165               |
| >sp E2RKA8 RL32_CANLF 60S ribosomal protein L32 OS=Canis lupus familiaris OX=9615 GN=RPL32 PE=1 SV=1                                         | 0.65     | 0.02           | 136.10     | 305681280.0     | 55           | 2                    | 0                 | 4.44       | 135               | 275               |
| >tr F1PR54 F1PR54_CANLF Lactotransferrin OS=Canis lupus familiaris OX=9615 GN=LTF PE=3 SV=1                                                  | 18.69    | 3.07           | 397.90     | 294005519.4     | 75           | 15                   | 0                 | 18.22      | 708               | 40436             |
| >sp P62286 ASPM_CANLF Abnormal spindle-like microcephaly-associated protein homolog OS=Canis lupus familiaris OX=9615 GN=ASPM PE=2 SV=2      | 1.96     | 0.14           | 85.20      | 287427350.8     | 90           | 3                    | 0                 | 0.32       | 3469              | 677               |
| >sp O18840 ACTB_CANLF Actin, cytoplasmic 1 OS=Canis lupus familiaris OX=9615 GN=ACTB PE=2 SV=3                                               | 4.71     | 3.57           | 281.80     | 273998734.5     | 19           | 2                    | 0                 | 5.33       | 375               | 642               |

|                                                                                                                          |       |      |        |             |     |    |   |       |      |       |
|--------------------------------------------------------------------------------------------------------------------------|-------|------|--------|-------------|-----|----|---|-------|------|-------|
| >tr A0A5F4DD58 A0A5F4DD58_CANLF Phosphoinositide phospholipase C OS=Canis lupus familiaris OX=9615 GN=PLCD3 PE=4 SV=1    | 0.51  | 0.31 | 230.40 | 232039410.9 | 140 | 3  | 0 | 1.48  | 741  | 3088  |
| >sp P25473 CLUS_CANLF Clusterin OS=Canis lupus familiaris OX=9615 GN=CLU PE=2 SV=1                                       | 5.63  | 2.22 | 328.30 | 211355223.5 | 32  | 7  | 0 | 8.99  | 445  | 725   |
| >tr A0A5F4BVF3 A0A5F4BVF3_CANLF Lactotransferrin OS=Canis lupus familiaris OX=9615 GN=LTF PE=3 SV=1                      | 9.40  | 3.45 | 337.00 | 208889865.0 | 38  | 8  | 0 | 9.42  | 626  | 32850 |
| >sp O18840 ACTB_CANLF Actin, cytoplasmic 1 OS=Canis lupus familiaris OX=9615 GN=ACTB PE=2 SV=3                           | 6.01  | 3.34 | 280.70 | 198640885.7 | 18  | 2  | 0 | 5.33  | 375  | 642   |
| >sp P49822 ALBU_CANLF Albumin OS=Canis lupus familiaris OX=9615 GN=ALB PE=1 SV=3                                         | 3.86  | 2.52 | 211.10 | 188982271.2 | 22  | 4  | 0 | 8.39  | 608  | 490   |
| >sp O18840 ACTB_CANLF Actin, cytoplasmic 1 OS=Canis lupus familiaris OX=9615 GN=ACTB PE=2 SV=3                           | 3.48  | 1.23 | 219.10 | 186364574.1 | 17  | 3  | 0 | 10.13 | 375  | 642   |
| >sp O18840 ACTB_CANLF Actin, cytoplasmic 1 OS=Canis lupus familiaris OX=9615 GN=ACTB PE=2 SV=3                           | 6.39  | 3.83 | 322.20 | 168494180.5 | 21  | 5  | 0 | 8.27  | 375  | 642   |
| >sp Q9XS65 PTGDS_CANLF Prostaglandin-H2 D-isomerase OS=Canis lupus familiaris OX=9615 GN=PTGDS PE=2 SV=1                 | 3.01  | 1.11 | 351.10 | 167606083.6 | 35  | 3  | 1 | 13.61 | 191  | 165   |
| >sp O18840 ACTB_CANLF Actin, cytoplasmic 1 OS=Canis lupus familiaris OX=9615 GN=ACTB PE=2 SV=3                           | 9.22  | 4.49 | 350.60 | 152859001.6 | 24  | 5  | 0 | 13.07 | 375  | 642   |
| >tr A0A5F4C1S8 A0A5F4C1S8_CANLF E3 ubiquitin-protein ligase CBL OS=Canis lupus familiaris OX=9615 GN=CBL PE=4 SV=1       | 0.50  | 0.08 | 153.60 | 151951512.7 | 21  | 2  | 0 | 0.91  | 773  | 1308  |
| >tr A0A5F4C1S8 A0A5F4C1S8_CANLF E3 ubiquitin-protein ligase CBL OS=Canis lupus familiaris OX=9615 GN=CBL PE=4 SV=1       | 0.88  | 0.46 | 223.10 | 148111446.0 | 22  | 1  | 0 | 0.52  | 773  | 1308  |
| >tr A0A5F4D6L9 A0A5F4D6L9_CANLF Sacsin molecular chaperone OS=Canis lupus familiaris OX=9615 GN=SACS PE=4 SV=1           | 0.81  | 0.54 | 194.60 | 140131501.7 | 44  | 3  | 0 | 0.27  | 4500 | 1444  |
| >sp O18840 ACTB_CANLF Actin, cytoplasmic 1 OS=Canis lupus familiaris OX=9615 GN=ACTB PE=2 SV=3                           | 4.27  | 3.70 | 334.80 | 137279040.9 | 13  | 2  | 0 | 4.53  | 375  | 642   |
| >tr A0A5F4CEM0 A0A5F4CEM0_CANLF Proline rich coiled-coil 2B OS=Canis lupus familiaris OX=9615 GN=PRRC2B PE=4 SV=1        | 0.16  | 0.02 | 127.90 | 135370939.7 | 13  | 1  | 1 | 0.58  | 2235 | 37089 |
| >sp O18840 ACTB_CANLF Actin, cytoplasmic 1 OS=Canis lupus familiaris OX=9615 GN=ACTB PE=2 SV=3                           | 3.08  | 2.45 | 414.20 | 133874317.1 | 14  | 2  | 0 | 4.53  | 375  | 642   |
| >sp P49822 ALBU_CANLF Albumin OS=Canis lupus familiaris OX=9615 GN=ALB PE=1 SV=3                                         | 4.18  | 1.15 | 322.70 | 123903818.7 | 21  | 7  | 0 | 15.13 | 608  | 490   |
| >tr Q9XSV4 Q9XSV4_CANLF CE10 protein OS=Canis lupus familiaris OX=9615 GN=ce10 PE=2 SV=1                                 | 3.28  | 2.61 | 253.30 | 117020949.8 | 19  | 3  | 0 | 14.55 | 110  | 41542 |
| >sp P49822 ALBU_CANLF Albumin OS=Canis lupus familiaris OX=9615 GN=ALB PE=1 SV=3                                         | 3.82  | 0.88 | 276.20 | 114292000.1 | 19  | 5  | 1 | 8.39  | 608  | 490   |
| >tr E2RE16 E2RE16_CANLF Non-specific serine/threonine protein kinase OS=Canis lupus familiaris OX=9615 GN=PAK4 PE=4 SV=1 | 0.61  | 0.02 | 86.70  | 112965242.4 | 57  | 1  | 0 | 0.84  | 592  | 12735 |
| >sp O18840 ACTB_CANLF Actin, cytoplasmic 1 OS=Canis lupus familiaris OX=9615 GN=ACTB PE=2 SV=3                           | 5.33  | 3.46 | 321.20 | 111249282.4 | 15  | 3  | 0 | 5.60  | 375  | 642   |
| >sp O18840 ACTB_CANLF Actin, cytoplasmic 1 OS=Canis lupus familiaris OX=9615 GN=ACTB PE=2 SV=3                           | 7.26  | 4.16 | 385.40 | 110173530.3 | 15  | 4  | 0 | 8.27  | 375  | 642   |
| >tr F1PR54 F1PR54_CANLF Lactotransferrin OS=Canis lupus familiaris OX=9615 GN=LTF PE=3 SV=1                              | 18.92 | 3.64 | 313.90 | 109770181.5 | 47  | 12 | 0 | 15.96 | 708  | 40436 |

|                                                                                                                                                   |      |      |        |             |    |   |   |       |      |       |
|---------------------------------------------------------------------------------------------------------------------------------------------------|------|------|--------|-------------|----|---|---|-------|------|-------|
| >tr A0A5F4BVF3 A0A5F4BVF3_CANLF Lactotransferrin OS=Canis lupus familiaris<br>OX=9615 GN=LTF PE=3 SV=1                                            | 4.24 | 2.10 | 303.40 | 109258034.8 | 21 | 5 | 0 | 5.91  | 626  | 32850 |
| >tr E2RN16 E2RN16_CANLF Mitogen-activated protein kinase kinase 2 OS=Canis lupus familiaris<br>OX=9615 GN=MAP3K2 PE=4 SV=2                        | 0.26 | 0.10 | 219.10 | 106763900.6 | 10 | 1 | 0 | 0.97  | 620  | 34325 |
| >sp P49822 ALBU_CANLF Albumin OS=Canis lupus familiaris OX=9615 GN=ALB PE=1<br>SV=3                                                               | 4.45 | 2.36 | 295.00 | 93470727.3  | 17 | 6 | 1 | 10.86 | 608  | 490   |
| >tr A0A5F4BVF3 A0A5F4BVF3_CANLF Lactotransferrin OS=Canis lupus familiaris<br>OX=9615 GN=LTF PE=3 SV=1                                            | 4.84 | 2.92 | 299.40 | 87110930.6  | 17 | 3 | 0 | 3.99  | 626  | 32850 |
| >tr A0A5F4BVF3 A0A5F4BVF3_CANLF Lactotransferrin OS=Canis lupus familiaris<br>OX=9615 GN=LTF PE=3 SV=1                                            | 4.71 | 2.62 | 306.30 | 83811883.9  | 18 | 4 | 0 | 5.75  | 626  | 32850 |
| >tr A0A5F4CAH2 A0A5F4CAH2_CANLF RNA polymerase II subunit A C-terminal domain<br>phosphatase OS=Canis lupus familiaris OX=9615 GN=CTDP1 PE=4 SV=1 | 0.53 | 0.35 | 137.30 | 83769899.9  | 10 | 1 | 0 | 0.74  | 945  | 14396 |
| >tr A0A5F4DKE8 A0A5F4DKE8_CANLF Suppression of tumorigenicity 7 like OS=Canis lupus familiaris<br>OX=9615 GN=ST7L PE=3 SV=1                       | 1.33 | 0.86 | 202.40 | 83267598.1  | 18 | 2 | 0 | 1.24  | 644  | 5269  |
| >sp P25473 CLUS_CANLF Clusterin OS=Canis lupus familiaris OX=9615 GN=CLU PE=2<br>SV=1                                                             | 1.04 | 0.89 | 275.80 | 80533012.8  | 10 | 3 | 0 | 3.37  | 445  | 725   |
| >tr A0A5F4CAH2 A0A5F4CAH2_CANLF RNA polymerase II subunit A C-terminal domain<br>phosphatase OS=Canis lupus familiaris OX=9615 GN=CTDP1 PE=4 SV=1 | 0.29 | 0.13 | 133.60 | 76625383.7  | 9  | 1 | 0 | 0.74  | 945  | 14396 |
| >tr Q9XSV4 Q9XSV4_CANLF CE10 protein OS=Canis lupus familiaris OX=9615 GN=ce10<br>PE=2 SV=1                                                       | 7.57 | 3.06 | 363.80 | 74770867.6  | 31 | 4 | 0 | 23.64 | 110  | 41542 |
| >tr F1PGK9 F1PGK9_CANLF ADAM metalloproteinase with thrombospondin type 1 motif 5<br>OS=Canis lupus familiaris OX=9615 GN=ADAMTS5 PE=4 SV=3       | 0.29 | 0.02 | 62.80  | 71960179.4  | 31 | 1 | 0 | 0.59  | 845  | 11956 |
| >tr E2RRP1 E2RRP1_CANLF Butyryl-CoA dehydrogenase OS=Canis lupus familiaris<br>OX=9615 GN=IVD PE=3 SV=2                                           | 0.20 | 0.12 | 103.90 | 69416871.5  | 5  | 1 | 0 | 3.99  | 426  | 10739 |
| >sp P49822 ALBU_CANLF Albumin OS=Canis lupus familiaris OX=9615 GN=ALB PE=1<br>SV=3                                                               | 4.75 | 2.74 | 244.10 | 68239829.4  | 10 | 4 | 1 | 6.91  | 608  | 490   |
| >tr J9NS28 J9NS28_CANLF RBR-type E3 ubiquitin transferase OS=Canis lupus familiaris<br>OX=9615 GN=ANKIB1 PE=4 SV=2                                | 0.42 | 0.36 | 78.40  | 68169466.9  | 4  | 1 | 0 | 2.33  | 988  | 26345 |
| >tr F1PGK9 F1PGK9_CANLF ADAM metalloproteinase with thrombospondin type 1 motif 5<br>OS=Canis lupus familiaris OX=9615 GN=ADAMTS5 PE=4 SV=3       | 0.23 | 0.02 | 35.60  | 65563484.4  | 32 | 1 | 0 | 0.59  | 845  | 11956 |
| >tr J9NTK2 J9NTK2_CANLF J domain-containing protein OS=Canis lupus familiaris OX=9615<br>GN=DNAJC12 PE=4 SV=2                                     | 0.46 | 0.36 | 169.00 | 65402747.5  | 6  | 1 | 0 | 4.72  | 106  | 2310  |
| >tr A0A5F4DKE8 A0A5F4DKE8_CANLF Suppression of tumorigenicity 7 like OS=Canis lupus familiaris<br>OX=9615 GN=ST7L PE=3 SV=1                       | 1.98 | 0.87 | 205.70 | 64765730.2  | 15 | 2 | 0 | 1.24  | 644  | 5269  |
| >tr A0A5K1V0D8 A0A5K1V0D8_CANLF Sulfatase 2 OS=Canis lupus familiaris OX=9615<br>GN=SULF2 PE=3 SV=1                                               | 0.10 | 0.02 | 189.60 | 64093192.6  | 11 | 1 | 0 | 0.35  | 859  | 1192  |
| >tr F1PBJ1 F1PBJ1_CANLF Methylcytosine dioxygenase TET OS=Canis lupus familiaris<br>OX=9615 GN=TET3 PE=3 SV=2                                     | 0.40 | 0.10 | 44.80  | 62836488.3  | 16 | 1 | 0 | 0.28  | 1795 | 1529  |
| >tr Q9XSV4 Q9XSV4_CANLF CE10 protein OS=Canis lupus familiaris OX=9615 GN=ce10<br>PE=2 SV=1                                                       | 1.02 | 0.88 | 266.60 | 62465982.2  | 10 | 1 | 0 | 9.09  | 110  | 41542 |
| >tr E2RG76 E2RG76_CANLF Inactive ribonuclease-like protein 10 OS=Canis lupus familiaris<br>OX=9615 GN=RNASE10 PE=3 SV=2                           | 0.22 | 0.10 | 202.90 | 59813431.0  | 8  | 1 | 0 | 3.70  | 297  | 8212  |
| >tr E2RE16 E2RE16_CANLF Non-specific serine/threonine protein kinase OS=Canis lupus familiaris<br>OX=9615 GN=PAK4 PE=4 SV=1                       | 0.18 | 0.02 | 57.60  | 59242568.1  | 23 | 1 | 0 | 0.84  | 592  | 12735 |

|                                                                                                                                         |      |      |        |            |    |   |   |       |      |       |
|-----------------------------------------------------------------------------------------------------------------------------------------|------|------|--------|------------|----|---|---|-------|------|-------|
| >sp P49822 ALBU_CANLF Albumin OS=Canis lupus familiaris OX=9615 GN=ALB PE=1 SV=3                                                        | 0.52 | 0.44 | 162.20 | 58078598.7 | 6  | 2 | 1 | 2.30  | 608  | 490   |
| >tr J9NYC7 J9NYC7_CANLF Dynein axonemal heavy chain 12 OS=Canis lupus familiaris OX=9615 GN=DNAH12 PE=3 SV=1                            | 0.41 | 0.36 | 179.30 | 56593223.2 | 4  | 1 | 0 | 0.33  | 3960 | 15992 |
| >sp Q28895 NPC2_CANLF NPC intracellular cholesterol transporter 2 OS=Canis lupus familiaris OX=9615 GN=NPC2 PE=2 SV=1                   | 3.96 | 1.84 | 408.10 | 56541705.1 | 29 | 4 | 0 | 36.91 | 149  | 153   |
| >tr E2R868 E2R868_CANLF [histone H4]-N-methyl-L-lysine20 N-methyltransferase KMT5B OS=Canis lupus familiaris OX=9615 GN=KMT5B PE=4 SV=3 | 0.25 | 0.23 | 35.30  | 55400080.5 | 10 | 3 | 2 | 1.81  | 885  | 7704  |
| >sp Q28895 NPC2_CANLF NPC intracellular cholesterol transporter 2 OS=Canis lupus familiaris OX=9615 GN=NPC2 PE=2 SV=1                   | 6.13 | 3.42 | 364.80 | 54117000.6 | 13 | 2 | 0 | 24.16 | 149  | 153   |
| >tr Q9XSV4 Q9XSV4_CANLF CE10 protein OS=Canis lupus familiaris OX=9615 GN=ce10 PE=2 SV=1                                                | 5.17 | 4.02 | 301.80 | 53971451.9 | 25 | 3 | 0 | 12.73 | 110  | 41542 |
| >tr Q9XSV4 Q9XSV4_CANLF CE10 protein OS=Canis lupus familiaris OX=9615 GN=ce10 PE=2 SV=1                                                | 3.86 | 2.31 | 328.50 | 53745445.6 | 27 | 3 | 0 | 12.73 | 110  | 41542 |
| >tr A0A5F4C0S7 A0A5F4C0S7_CANLF HEAT repeat containing 5A OS=Canis lupus familiaris OX=9615 GN=HEATR5A PE=3 SV=1                        | 0.31 | 0.13 | 55.20  | 51558300.2 | 17 | 1 | 0 | 0.25  | 1995 | 1753  |
| >tr A0A5F4C9T7 A0A5F4C9T7_CANLF Telomerase associated protein 1 OS=Canis lupus familiaris OX=9615 GN=TEP1 PE=4 SV=1                     | 0.10 | 0.00 | 32.60  | 50450702.5 | 3  | 1 | 0 | 0.16  | 2507 | 891   |
| >tr J9NYC7 J9NYC7_CANLF Dynein axonemal heavy chain 12 OS=Canis lupus familiaris OX=9615 GN=DNAH12 PE=3 SV=1                            | 1.46 | 1.42 | 123.50 | 45928018.2 | 3  | 1 | 0 | 0.33  | 3960 | 15992 |
| >sp P62286 ASPM_CANLF Abnormal spindle-like microcephaly-associated protein homolog OS=Canis lupus familiaris OX=9615 GN=ASPM PE=2 SV=2 | 0.33 | 0.13 | 114.80 | 45431255.6 | 17 | 2 | 0 | 0.23  | 3469 | 677   |
| >tr E2R824 E2R824_CANLF Zinc finger protein 518B OS=Canis lupus familiaris OX=9615 GN=ZNF518B PE=4 SV=3                                 | 0.15 | 0.02 | 115.70 | 45048357.4 | 41 | 2 | 1 | 1.30  | 1000 | 24468 |
| >tr A0A5F4C618 A0A5F4C618_CANLF Basonuclin 1 OS=Canis lupus familiaris OX=9615 GN=BNC1 PE=4 SV=1                                        | 0.38 | 0.34 | 104.80 | 44256001.8 | 3  | 1 | 0 | 1.66  | 965  | 2022  |
| >tr E2QXA7 E2QXA7_CANLF LETM1 domain containing 1 OS=Canis lupus familiaris OX=9615 GN=LETMD1 PE=4 SV=2                                 | 0.94 | 0.90 | 129.60 | 43986142.8 | 3  | 1 | 1 | 2.95  | 373  | 9332  |
| >sp E2RKA8 RL32_CANLF 60S ribosomal protein L32 OS=Canis lupus familiaris OX=9615 GN=RPL32 PE=1 SV=1                                    | 0.29 | 0.03 | 110.20 | 41596467.8 | 17 | 1 | 0 | 2.22  | 135  | 275   |
| >tr A0A5F4DMP2 A0A5F4DMP2_CANLF Heterogeneous nuclear ribonucleoprotein M OS=Canis lupus familiaris OX=9615 GN=HNRNPM PE=4 SV=1         | 0.53 | 0.39 | 102.80 | 41232650.6 | 8  | 1 | 0 | 0.55  | 731  | 1228  |
| >sp Q9GL25 ESPB1_CANLF Epididymal sperm-binding protein 1 OS=Canis lupus familiaris OX=9615 GN=ELSPBP1 PE=1 SV=1                        | 0.44 | 0.38 | 200.00 | 41095353.0 | 4  | 1 | 0 | 6.94  | 245  | 36    |
| >sp Q9GL25 ESPB1_CANLF Epididymal sperm-binding protein 1 OS=Canis lupus familiaris OX=9615 GN=ELSPBP1 PE=1 SV=1                        | 1.26 | 1.20 | 106.20 | 40690435.7 | 4  | 1 | 0 | 6.94  | 245  | 36    |
| >tr A0A5F4D9Z7 A0A5F4D9Z7_CANLF Zinc finger FYVE-type containing 19 OS=Canis lupus familiaris OX=9615 GN=ZFYVE19 PE=4 SV=1              | 0.12 | 0.12 | 96.80  | 40635378.9 | 2  | 1 | 0 | 1.53  | 392  | 13875 |
| >tr E2RG75 E2RG75_CANLF Inactive ribonuclease-like protein 9 OS=Canis lupus familiaris OX=9615 GN=RNASE9 PE=3 SV=2                      | 6.87 | 3.34 | 433.40 | 40242533.6 | 9  | 3 | 1 | 8.08  | 198  | 41734 |
| >tr A0A5K1V5T8 A0A5K1V5T8_CANLF Zinc finger and BTB domain containing 49 OS=Canis lupus familiaris OX=9615 GN=ZBTB49 PE=4 SV=1          | 0.25 | 0.21 | 68.40  | 40135537.3 | 3  | 1 | 0 | 1.47  | 543  | 5803  |
| >tr A0A5K1V0D8 A0A5K1V0D8_CANLF Sulfatase 2 OS=Canis lupus familiaris OX=9615 GN=SULF2 PE=3 SV=1                                        | 0.16 | 0.02 | 128.40 | 40089978.0 | 9  | 1 | 0 | 0.35  | 859  | 1192  |

|                                                                                                                                                       |      |      |        |            |    |   |   |       |      |       |
|-------------------------------------------------------------------------------------------------------------------------------------------------------|------|------|--------|------------|----|---|---|-------|------|-------|
| >tr J9NZH4 J9NZH4_CANLF NTR domain-containing protein OS=Canis lupus familiaris<br>OX=9615 GN=LOC102154527 PE=3 SV=2                                  | 1.29 | 1.23 | 133.40 | 39923173.6 | 4  | 1 | 0 | 8.60  | 221  | 39505 |
| >tr A0A5F4CPE1 A0A5F4CPE1_CANLF Major facilitator superfamily domain containing 14B<br>OS=Canis lupus familiaris OX=9615 GN=MFSD14B PE=4 SV=1         | 0.10 | 0.00 | 83.60  | 38928765.7 | 2  | 1 | 0 | 3.71  | 485  | 28321 |
| >tr Q9XSV4 Q9XSV4_CANLF CE10 protein OS=Canis lupus familiaris OX=9615 GN=ce10<br>PE=2 SV=1                                                           | 3.86 | 1.63 | 281.40 | 38452000.8 | 16 | 3 | 0 | 14.55 | 110  | 41542 |
| >tr A0A5F4D7J3 A0A5F4D7J3_CANLF Non-specific serine/threonine protein kinase OS=Canis<br>lupus familiaris OX=9615 GN=CDC42BPA PE=3 SV=1               | 1.12 | 1.03 | 283.40 | 37440878.0 | 6  | 1 | 0 | 0.22  | 1794 | 1069  |
| >tr E2RMC9 E2RMC9_CANLF DUF4515 domain-containing protein OS=Canis lupus<br>familiaris OX=9615 GN=LOC100688167 PE=4 SV=3                              | 0.15 | 0.04 | 182.00 | 36108884.8 | 11 | 2 | 0 | 2.08  | 432  | 29175 |
| >tr F1PB65 F1PB65_CANLF RAD54 like 2 OS=Canis lupus familiaris OX=9615<br>GN=RAD54L2 PE=3 SV=2                                                        | 0.30 | 0.28 | 158.60 | 35733148.2 | 2  | 1 | 0 | 0.55  | 1467 | 11575 |
| >tr J9NS29 J9NS29_CANLF Cystatin domain-containing protein OS=Canis lupus familiaris<br>OX=9615 GN=LOC607874 PE=4 SV=2                                | 0.46 | 0.46 | 202.40 | 35486277.3 | 2  | 1 | 0 | 6.39  | 313  | 30016 |
| >tr E2RRE4 E2RRE4_CANLF Netrin 5 OS=Canis lupus familiaris OX=9615 GN=NTN5 PE=4<br>SV=3                                                               | 0.25 | 0.13 | 133.90 | 35168475.2 | 7  | 1 | 0 | 1.02  | 489  | 13410 |
| >tr A0A5F4CQY7 A0A5F4CQY7_CANLF Neuregulin 2 OS=Canis lupus familiaris OX=9615<br>GN=NRG2 PE=4 SV=1                                                   | 0.26 | 0.02 | 39.20  | 35061327.2 | 19 | 1 | 0 | 0.62  | 802  | 13353 |
| >tr F1PGF9 F1PGF9_CANLF Rho guanine nucleotide exchange factor 26 OS=Canis lupus<br>familiaris OX=9615 GN=ARHGEF26 PE=4 SV=3                          | 0.74 | 0.70 | 304.40 | 34821887.7 | 3  | 1 | 0 | 0.84  | 594  | 22876 |
| >tr J9NTK2 J9NTK2_CANLF J domain-containing protein OS=Canis lupus familiaris OX=9615<br>GN=DNAJC12 PE=4 SV=2                                         | 0.16 | 0.12 | 138.00 | 34327155.4 | 3  | 1 | 0 | 4.72  | 106  | 2310  |
| >tr E2QW13 E2QW13_CANLF Inhibin subunit beta A OS=Canis lupus familiaris OX=9615<br>GN=INHBA PE=3 SV=1                                                | 0.54 | 0.48 | 70.50  | 34234131.7 | 4  | 1 | 1 | 2.59  | 424  | 5794  |
| >tr J9NTK2 J9NTK2_CANLF J domain-containing protein OS=Canis lupus familiaris OX=9615<br>GN=DNAJC12 PE=4 SV=2                                         | 0.10 | 0.00 | 104.30 | 33689209.6 | 2  | 1 | 0 | 4.72  | 106  | 2310  |
| >tr A0A5F4D1D2 A0A5F4D1D2_CANLF Protein-tyrosine-phosphatase OS=Canis lupus<br>familiaris OX=9615 GN=PTPRD PE=3 SV=1                                  | 2.53 | 2.52 | 63.00  | 33485086.8 | 2  | 1 | 0 | 0.60  | 1828 | 2208  |
| >tr F1PGF9 F1PGF9_CANLF Rho guanine nucleotide exchange factor 26 OS=Canis lupus<br>familiaris OX=9615 GN=ARHGEF26 PE=4 SV=3                          | 1.34 | 1.28 | 294.10 | 33161554.5 | 4  | 1 | 0 | 0.84  | 594  | 22876 |
| >sp Q8WN22 PRKDC_CANLF DNA-dependent protein kinase catalytic subunit OS=Canis<br>lupus familiaris OX=9615 GN=PRKDC PE=2 SV=1                         | 1.90 | 1.18 | 185.40 | 33005844.1 | 6  | 3 | 0 | 0.22  | 4144 | 338   |
| >sp Q9GL25 ESPB1_CANLF Epididymal sperm-binding protein 1 OS=Canis lupus familiaris<br>OX=9615 GN=ELSPBP1 PE=1 SV=1                                   | 3.55 | 2.26 | 137.40 | 32822569.4 | 5  | 2 | 0 | 11.43 | 245  | 36    |
| >tr F1Q432 F1Q432_CANLF Tenascin XB OS=Canis lupus familiaris OX=9615 GN=TNXB<br>PE=3 SV=3                                                            | 0.53 | 0.49 | 279.50 | 32357737.3 | 3  | 1 | 0 | 0.13  | 3966 | 30371 |
| >tr J9P487 J9P487_CANLF Serine/threonine-protein phosphatase 2A 55 kDa regulatory subunit<br>B OS=Canis lupus familiaris OX=9615 GN=PPP2R2D PE=3 SV=2 | 0.26 | 0.24 | 15.80  | 32338413.4 | 2  | 1 | 0 | 7.96  | 427  | 12816 |
| >tr F6UZ16 F6UZ16_CANLF Zinc finger BED-type containing 9 OS=Canis lupus familiaris<br>OX=9615 GN=ZBED9 PE=4 SV=2                                     | 0.21 | 0.17 | 23.90  | 32090101.7 | 3  | 2 | 2 | 1.51  | 1327 | 42064 |
| >tr A0A5F4CS27 A0A5F4CS27_CANLF Abhydrolase domain containing 14B OS=Canis lupus<br>familiaris OX=9615 GN=ABHD14B PE=4 SV=1                           | 0.10 | 0.00 | 126.30 | 31942504.9 | 2  | 1 | 0 | 2.56  | 234  | 21786 |
| >tr F1PFZ5 F1PFZ5_CANLF Milk fat globule EGF and factor V/VIII domain containing<br>OS=Canis lupus familiaris OX=9615 GN=MFG8 PE=4 SV=3               | 0.49 | 0.43 | 157.40 | 31552216.5 | 4  | 1 | 0 | 1.87  | 428  | 7079  |

|                                                                                                                                                      |      |      |        |            |    |   |   |       |      |       |
|------------------------------------------------------------------------------------------------------------------------------------------------------|------|------|--------|------------|----|---|---|-------|------|-------|
| >tr Q9XSV4 Q9XSV4_CANLF CE10 protein OS=Canis lupus familiaris OX=9615 GN=ce10 PE=2 SV=1                                                             | 3.25 | 1.57 | 293.60 | 31290614.7 | 14 | 3 | 0 | 14.55 | 110  | 41542 |
| >tr A0A5F4DBL7 A0A5F4DBL7_CANLF LDL receptor related protein 1 OS=Canis lupus familiaris OX=9615 GN=LRP1 PE=3 SV=1                                   | 0.15 | 0.13 | 118.90 | 31037917.9 | 2  | 1 | 0 | 0.34  | 4133 | 14011 |
| >tr J9NS29 J9NS29_CANLF Cystatin domain-containing protein OS=Canis lupus familiaris OX=9615 GN=LOC607874 PE=4 SV=2                                  | 0.32 | 0.28 | 111.90 | 30625104.5 | 3  | 1 | 0 | 4.79  | 313  | 30016 |
| >tr A0A5F4CCD0 A0A5F4CCD0_CANLF Cysteine rich secretory protein 2 OS=Canis lupus familiaris OX=9615 GN=CRISP2 PE=3 SV=1                              | 2.90 | 1.75 | 273.80 | 30582918.9 | 7  | 2 | 0 | 7.07  | 311  | 11017 |
| >tr J9P4U7 J9P4U7_CANLF Alpha-1,6-mannosyl-glycoprotein 6-beta-N-acetylglucosaminyltransferase OS=Canis lupus familiaris OX=9615 GN=MGAT5B PE=3 SV=2 | 0.17 | 0.13 | 65.90  | 30557673.3 | 3  | 1 | 1 | 1.39  | 792  | 13595 |
| >tr A0A5F4CCD0 A0A5F4CCD0_CANLF Cysteine rich secretory protein 2 OS=Canis lupus familiaris OX=9615 GN=CRISP2 PE=3 SV=1                              | 2.13 | 2.05 | 287.00 | 30267844.4 | 5  | 1 | 0 | 2.25  | 311  | 11017 |
| >tr E2RIH1 E2RIH1_CANLF DOP1 leucine zipper like protein B OS=Canis lupus familiaris OX=9615 GN=DOP1B PE=3 SV=3                                      | 0.81 | 0.56 | 37.60  | 30256843.0 | 9  | 2 | 0 | 1.42  | 2259 | 7751  |
| >tr E2R6E0 E2R6E0_CANLF Lipocln_cytosolic_FA-bd_dom domain-containing protein OS=Canis lupus familiaris OX=9615 GN=LCNL1 PE=3 SV=2                   | 3.03 | 2.97 | 193.10 | 30089137.0 | 4  | 1 | 0 | 3.01  | 299  | 1932  |
| >tr E2RRP3 E2RRP3_CANLF LIM homeobox 5 OS=Canis lupus familiaris OX=9615 GN=LHX5 PE=4 SV=1                                                           | 0.25 | 0.23 | 161.80 | 30034913.6 | 2  | 1 | 0 | 2.24  | 402  | 19607 |
| >tr A0A5F4CPU3 A0A5F4CPU3_CANLF SEC24 homolog D, COPII coat complex component OS=Canis lupus familiaris OX=9615 GN=SEC24D PE=3 SV=1                  | 0.20 | 0.13 | 34.30  | 29986999.0 | 10 | 1 | 0 | 0.53  | 946  | 2125  |
| >tr J9P3H8 J9P3H8_CANLF ATM interactor OS=Canis lupus familiaris OX=9615 GN=ATMIN PE=4 SV=2                                                          | 0.20 | 0.10 | 44.00  | 28658261.0 | 11 | 1 | 0 | 0.58  | 863  | 882   |
| >tr F1PGF9 F1PGF9_CANLF Rho guanine nucleotide exchange factor 26 OS=Canis lupus familiaris OX=9615 GN=ARHGEF26 PE=4 SV=3                            | 1.28 | 1.22 | 309.00 | 28259485.7 | 4  | 1 | 0 | 0.84  | 594  | 22876 |
| >sp Q9GL25 ESPBI1_CANLF Epididymal sperm-binding protein 1 OS=Canis lupus familiaris OX=9615 GN=ELSPBP1 PE=1 SV=1                                    | 0.73 | 0.65 | 192.50 | 27935980.9 | 5  | 1 | 0 | 6.94  | 245  | 36    |
| >tr A0A5F4DHH0 A0A5F4DHH0_CANLF ATP binding cassette subfamily A member 1 OS=Canis lupus familiaris OX=9615 GN=ABCA1 PE=4 SV=1                       | 0.28 | 0.02 | 23.80  | 27929620.9 | 14 | 1 | 0 | 0.23  | 2175 | 3709  |
| >tr E2RCT1 E2RCT1_CANLF WAP domain-containing protein OS=Canis lupus familiaris OX=9615 PE=4 SV=2                                                    | 0.62 | 0.28 | 173.60 | 27296972.7 | 6  | 3 | 0 | 24.14 | 116  | 21717 |
| >tr A0A5F4BZ12 A0A5F4BZ12_CANLF Importin 11 OS=Canis lupus familiaris OX=9615 GN=IPO11 PE=4 SV=1                                                     | 1.21 | 1.17 | 268.90 | 26980253.9 | 3  | 1 | 0 | 0.72  | 968  | 20170 |
| >sp P01002 IPSG_CANLF Double-headed protease inhibitor, submandibular gland OS=Canis lupus familiaris OX=9615 PE=1 SV=1                              | 2.02 | 1.96 | 210.90 | 26854855.2 | 4  | 1 | 0 | 7.83  | 115  | 434   |
| >tr A0A5F4C730 A0A5F4C730_CANLF Semaphorin 4D OS=Canis lupus familiaris OX=9615 GN=SEMA4D PE=3 SV=1                                                  | 0.35 | 0.31 | 202.40 | 26436220.2 | 3  | 1 | 0 | 0.28  | 1067 | 1802  |
| >tr A0A5F4D3J6 A0A5F4D3J6_CANLF ATP binding cassette subfamily A member 12 OS=Canis lupus familiaris OX=9615 GN=ABCA12 PE=4 SV=1                     | 0.44 | 0.34 | 106.30 | 25381153.8 | 6  | 1 | 1 | 0.31  | 2614 | 2871  |
| >sp O46607 GPX5_CANLF Epididymal secretory glutathione peroxidase OS=Canis lupus familiaris OX=9615 GN=GPX5 PE=2 SV=1                                | 0.41 | 0.25 | 218.20 | 24941059.5 | 3  | 2 | 0 | 8.60  | 221  | 564   |
| >sp Q28895 NPC2_CANLF NPC intracellular cholesterol transporter 2 OS=Canis lupus familiaris OX=9615 GN=NPC2 PE=2 SV=1                                | 2.86 | 2.84 | 294.90 | 24871865.9 | 2  | 1 | 0 | 15.44 | 149  | 153   |
| >tr A0A5F4CSE7 A0A5F4CSE7_CANLF TYR_PHOSPHATASE_2 domain-containing protein OS=Canis lupus familiaris OX=9615 GN=PTP4A1 PE=4 SV=1                    | 0.10 | 0.00 | 63.40  | 24837297.8 | 2  | 1 | 1 | 5.20  | 173  | 25182 |

|                                                                                                                                       |      |      |        |            |    |   |   |       |      |       |
|---------------------------------------------------------------------------------------------------------------------------------------|------|------|--------|------------|----|---|---|-------|------|-------|
| >tr F1PFZ5 F1PFZ5_CANLF Milk fat globule EGF and factor V/VIII domain containing OS=Canis lupus familiaris OX=9615 GN=MFGE8 PE=4 SV=3 | 2.29 | 2.25 | 240.70 | 24688641.3 | 3  | 1 | 0 | 1.87  | 428  | 7079  |
| >tr E2R6E0 E2R6E0_CANLF Lipocln_cytosolic_FA-bd_dom domain-containing protein OS=Canis lupus familiaris OX=9615 GN=LCNL1 PE=3 SV=2    | 1.42 | 1.36 | 188.70 | 24616683.7 | 4  | 1 | 0 | 3.01  | 299  | 1932  |
| >sp F1PRN2 MYO1D_CANLF Unconventional myosin-Id OS=Canis lupus familiaris OX=9615 GN=MYO1D PE=1 SV=2                                  | 0.37 | 0.21 | 206.80 | 24612720.7 | 9  | 1 | 0 | 0.30  | 1006 | 763   |
| >tr Q9XSV4 Q9XSV4_CANLF CE10 protein OS=Canis lupus familiaris OX=9615 GN=ce10 PE=2 SV=1                                              | 2.59 | 1.77 | 249.10 | 24116860.5 | 12 | 3 | 0 | 14.55 | 110  | 41542 |
| >tr A0A5F4DM58 A0A5F4DM58_CANLF Zinc finger MYM-type containing 2 OS=Canis lupus familiaris OX=9615 GN=ZMYM2 PE=4 SV=1                | 0.13 | 0.09 | 98.20  | 23746174.5 | 3  | 1 | 1 | 0.85  | 1295 | 4956  |
| >tr A0A5F4D3J6 A0A5F4D3J6_CANLF ATP binding cassette subfamily A member 12 OS=Canis lupus familiaris OX=9615 GN=ABCA12 PE=4 SV=1      | 0.32 | 0.22 | 118.20 | 23735100.0 | 6  | 1 | 1 | 0.31  | 2614 | 2871  |
| >tr E2RG75 E2RG75_CANLF Inactive ribonuclease-like protein 9 OS=Canis lupus familiaris OX=9615 GN=RNASE9 PE=3 SV=2                    | 8.73 | 4.37 | 420.10 | 23576522.8 | 6  | 3 | 1 | 8.08  | 198  | 41734 |
| >tr F1PS80 F1PS80_CANLF Protein phosphatase 4 regulatory subunit 1 OS=Canis lupus familiaris OX=9615 GN=PPP4R1 PE=4 SV=3              | 0.11 | 0.07 | 50.30  | 23137086.9 | 3  | 1 | 0 | 0.56  | 887  | 2666  |
| >sp O46607 GPX5_CANLF Epididymal secretory glutathione peroxidase OS=Canis lupus familiaris OX=9615 GN=GPX5 PE=2 SV=1                 | 1.43 | 1.10 | 171.40 | 23094427.1 | 2  | 2 | 0 | 8.60  | 221  | 564   |
| >tr A0A5F4CQY7 A0A5F4CQY7_CANLF Neuregulin 2 OS=Canis lupus familiaris OX=9615 GN=NRG2 PE=4 SV=1                                      | 0.10 | 0.02 | 85.40  | 23042448.7 | 35 | 1 | 0 | 0.62  | 802  | 13353 |
| >sp Q28895 NPC2_CANLF NPC intracellular cholesterol transporter 2 OS=Canis lupus familiaris OX=9615 GN=NPC2 PE=2 SV=1                 | 6.55 | 2.18 | 337.10 | 22906105.3 | 14 | 4 | 0 | 38.93 | 149  | 153   |
| >tr A0A5K1V0D8 A0A5K1V0D8_CANLF Sulfatase 2 OS=Canis lupus familiaris OX=9615 GN=SULF2 PE=3 SV=1                                      | 0.66 | 0.56 | 184.50 | 22817089.7 | 6  | 1 | 0 | 0.35  | 859  | 1192  |
| >tr A0A5F4DHD3 A0A5F4DHD3_CANLF Sorbin and SH3 domain containing 2 OS=Canis lupus familiaris OX=9615 GN=SORBS2 PE=4 SV=1              | 0.17 | 0.13 | 9.40   | 22743143.6 | 3  | 1 | 0 | 0.41  | 1219 | 1177  |
| >sp O97758 ZO1_CANLF Tight junction protein ZO-1 OS=Canis lupus familiaris OX=9615 GN=TJP1 PE=1 SV=1                                  | 0.17 | 0.13 | 9.40   | 22743143.6 | 3  | 1 | 0 | 0.28  | 1769 | 139   |
| >tr A0A5F4BT89 A0A5F4BT89_CANLF Olfactory receptor OS=Canis lupus familiaris OX=9615 GN=OR5W6 PE=3 SV=1                               | 0.10 | 0.00 | 24.70  | 22103820.5 | 1  | 1 | 1 | 6.95  | 302  | 29923 |
| >tr E2R4A0 E2R4A0_CANLF Actin-like protein 7B OS=Canis lupus familiaris OX=9615 GN=ACTL7B PE=3 SV=2                                   | 0.15 | 0.13 | 160.30 | 21951113.9 | 2  | 1 | 1 | 2.42  | 454  | 3066  |
| >tr A0A5F4DGS3 A0A5F4DGS3_CANLF Polypeptide N-acetylgalactosaminyltransferase OS=Canis lupus familiaris OX=9615 GN=GALNT18 PE=3 SV=1  | 0.35 | 0.33 | 101.50 | 21316920.7 | 2  | 1 | 0 | 0.99  | 607  | 14798 |
| >sp P01002 IPSG_CANLF Double-headed protease inhibitor, submandibular gland OS=Canis lupus familiaris OX=9615 PE=1 SV=1               | 0.27 | 0.24 | 182.90 | 21013934.2 | 3  | 1 | 0 | 7.83  | 115  | 434   |
| >tr E2RA00 E2RA00_CANLF Leucine rich repeat containing 8 VRAC subunit D OS=Canis lupus familiaris OX=9615 GN=LRRRC8D PE=3 SV=1        | 0.10 | 0.00 | 41.00  | 20869413.5 | 1  | 1 | 1 | 1.98  | 858  | 42697 |
| >tr F1PRL1 F1PRL1_CANLF Dppa2_A domain-containing protein OS=Canis lupus familiaris OX=9615 PE=4 SV=2                                 | 0.27 | 0.21 | 38.30  | 20672121.5 | 4  | 1 | 0 | 2.79  | 179  | 17222 |
| >tr Q9XSV4 Q9XSV4_CANLF CE10 protein OS=Canis lupus familiaris OX=9615 GN=ce10 PE=2 SV=1                                              | 0.75 | 0.52 | 222.10 | 20375401.0 | 6  | 3 | 0 | 14.55 | 110  | 41542 |
| >tr E2RR09 E2RR09_CANLF Sodium channel protein OS=Canis lupus familiaris OX=9615 GN=SCN4A PE=3 SV=2                                   | 0.33 | 0.29 | 106.10 | 20341988.1 | 3  | 1 | 1 | 0.33  | 1837 | 22889 |

|                                                                                                                                                 |      |      |        |            |    |   |   |      |      |       |
|-------------------------------------------------------------------------------------------------------------------------------------------------|------|------|--------|------------|----|---|---|------|------|-------|
| >tr J9P3H8 J9P3H8_CANLF ATM interactor OS=Canis lupus familiaris OX=9615 GN=ATMIN PE=4 SV=2                                                     | 0.48 | 0.02 | 40.60  | 20200389.4 | 24 | 1 | 0 | 0.58 | 863  | 882   |
| >tr A0A5F4D9S5 A0A5F4D9S5_CANLF Hyaluronoglucosaminidase OS=Canis lupus familiaris OX=9615 GN=CEMIP PE=3 SV=1                                   | 1.23 | 1.19 | 167.40 | 20127352.9 | 3  | 1 | 0 | 0.24 | 1684 | 9775  |
| >tr J9NS29 J9NS29_CANLF Cystatin domain-containing protein OS=Canis lupus familiaris OX=9615 GN=LOC607874 PE=4 SV=2                             | 1.18 | 1.16 | 190.10 | 20017522.7 | 2  | 1 | 0 | 6.39 | 313  | 30016 |
| >tr A0A5F4D7Y5 A0A5F4D7Y5_CANLF Pleckstrin homology, MyTH4 and FERM domain containing H1 OS=Canis lupus familiaris OX=9615 GN=PLEKHH1 PE=4 SV=1 | 0.96 | 0.93 | 218.90 | 19898063.0 | 3  | 1 | 0 | 0.30 | 1342 | 5979  |
| >tr F1PQM0 F1PQM0_CANLF BAH domain and coiled-coil containing 1 OS=Canis lupus familiaris OX=9615 GN=BAHCC1 PE=4 SV=3                           | 0.61 | 0.57 | 154.00 | 19044310.8 | 3  | 1 | 1 | 0.43 | 2565 | 10908 |
| >tr A0A5F4CDG4 A0A5F4CDG4_CANLF Protein phosphatase 1 regulatory subunit 32 OS=Canis lupus familiaris OX=9615 GN=PPP1R32 PE=4 SV=1              | 0.51 | 0.51 | 82.60  | 19036886.0 | 1  | 1 | 1 | 2.56 | 429  | 3606  |
| >tr A0A5F4BQ68 A0A5F4BQ68_CANLF Interferon-induced GTP-binding protein Mx1 OS=Canis lupus familiaris OX=9615 GN=MX2 PE=3 SV=1                   | 0.10 | 0.06 | 102.50 | 19008940.4 | 3  | 2 | 2 | 2.47 | 729  | 13816 |
| >tr A0A5F4DKY4 A0A5F4DKY4_CANLF Dehydrogenase E1 and transketolase domain containing 1 OS=Canis lupus familiaris OX=9615 GN=DHTKD1 PE=3 SV=1    | 0.18 | 0.14 | 81.00  | 18683652.4 | 3  | 1 | 0 | 2.40 | 834  | 5545  |
| >tr F1Q432 F1Q432_CANLF Tenascin XB OS=Canis lupus familiaris OX=9615 GN=TNXB PE=3 SV=3                                                         | 0.34 | 0.32 | 188.40 | 18566850.4 | 2  | 1 | 0 | 0.13 | 3966 | 30371 |
| >sp P23685 NAC1_CANLF Sodium/calcium exchanger 1 OS=Canis lupus familiaris OX=9615 GN=SLC8A1 PE=1 SV=1                                          | 0.25 | 0.21 | 133.30 | 18288613.1 | 3  | 1 | 0 | 1.03 | 970  | 764   |
| >tr A0A5F4CGE7 A0A5F4CGE7_CANLF C3 and PZP like alpha-2-macroglobulin domain containing 8 OS=Canis lupus familiaris OX=9615 GN=CPAMD8 PE=3 SV=1 | 0.35 | 0.33 | 19.40  | 18272240.6 | 2  | 1 | 1 | 1.07 | 1773 | 5057  |
| >tr E2RTL2 E2RTL2_CANLF Tubulin tyrosine ligase like 6 OS=Canis lupus familiaris OX=9615 GN=TTLL6 PE=4 SV=3                                     | 0.25 | 0.21 | 35.60  | 18218161.4 | 3  | 1 | 0 | 0.60 | 827  | 2703  |
| >sp A2IBY8 MIP_CANLF Lens fiber major intrinsic protein OS=Canis lupus familiaris OX=9615 GN=MIP PE=2 SV=1                                      | 0.64 | 0.55 | 81.00  | 18104535.5 | 6  | 1 | 0 | 1.90 | 263  | 112   |
| >tr E2RJF6 E2RJF6_CANLF Mortality factor 4 like 1 OS=Canis lupus familiaris OX=9615 GN=MORF4L1 PE=4 SV=3                                        | 0.15 | 0.13 | 56.00  | 18084682.8 | 2  | 1 | 0 | 4.56 | 439  | 18584 |
| >tr E2R186 E2R186_CANLF Fibroblast growth factor receptor OS=Canis lupus familiaris OX=9615 GN=FGFR1 PE=3 SV=3                                  | 0.10 | 0.02 | 74.70  | 17701554.6 | 10 | 1 | 0 | 0.59 | 853  | 9797  |
| >tr J9NZJ2 J9NZJ2_CANLF Protein Wnt OS=Canis lupus familiaris OX=9615 GN=WNT6 PE=3 SV=2                                                         | 0.23 | 0.21 | 214.90 | 17561941.3 | 2  | 1 | 0 | 1.47 | 339  | 11134 |
| >tr A0A5F4CYC6 A0A5F4CYC6_CANLF Leucine zipper protein 1 OS=Canis lupus familiaris OX=9615 GN=LUZP1 PE=4 SV=1                                   | 0.21 | 0.17 | 20.40  | 17508851.3 | 3  | 1 | 0 | 0.56 | 1074 | 30023 |
| >tr A0A5F4CS87 A0A5F4CS87_CANLF STE20 related adaptor alpha OS=Canis lupus familiaris OX=9615 GN=STRADA PE=4 SV=1                               | 0.29 | 0.29 | 138.70 | 16951984.1 | 1  | 1 | 0 | 2.08 | 336  | 14044 |
| >tr E2R0S2 E2R0S2_CANLF [Histone H3]-trimethyl-L-lysine(4) demethylase OS=Canis lupus familiaris OX=9615 GN=KDM5C PE=3 SV=3                     | 0.54 | 0.53 | 105.70 | 16949610.2 | 2  | 1 | 0 | 0.46 | 1523 | 25191 |
| >tr A0A5F4CKF6 A0A5F4CKF6_CANLF [Heparan sulfate]-glucosamine N-sulfotransferase OS=Canis lupus familiaris OX=9615 GN=NDST3 PE=3 SV=1           | 0.10 | 0.07 | 26.60  | 16917822.0 | 2  | 1 | 0 | 1.49 | 872  | 7557  |
| >tr F1PB68 F1PB68_CANLF Olfactomedin 4 OS=Canis lupus familiaris OX=9615 GN=OLFM4 PE=4 SV=3                                                     | 0.23 | 0.19 | 92.40  | 16620344.0 | 3  | 1 | 0 | 4.40 | 477  | 17246 |
| >tr F1P6D8 F1P6D8_CANLF Dynein axonemal heavy chain 5 OS=Canis lupus familiaris OX=9615 GN=DNAH5 PE=3 SV=3                                      | 0.10 | 0.00 | 105.40 | 16532748.4 | 1  | 1 | 0 | 0.19 | 4620 | 37739 |

|                                                                                                                                                 |      |      |        |            |    |   |   |       |      |       |
|-------------------------------------------------------------------------------------------------------------------------------------------------|------|------|--------|------------|----|---|---|-------|------|-------|
| >tr A0A5F4DJ37 A0A5F4DJ37_CANLF KRAB domain-containing protein OS=Canis lupus familiaris OX=9615 PE=4 SV=1                                      | 0.14 | 0.14 | 112.00 | 16515676.6 | 1  | 1 | 0 | 19.64 | 56   | 37151 |
| >tr F1PPP9 F1PPP9_CANLF Family with sequence similarity 135 member A OS=Canis lupus familiaris OX=9615 GN=FAM135A PE=3 SV=3                     | 0.33 | 0.10 | 169.80 | 16443805.1 | 16 | 1 | 0 | 1.22  | 1399 | 6815  |
| >tr E2R4W0 E2R4W0_CANLF Anaphase-promoting complex subunit 11 OS=Canis lupus familiaris OX=9615 GN=ANAPC11 PE=3 SV=2                            | 0.25 | 0.23 | 158.90 | 16436251.7 | 2  | 1 | 0 | 1.75  | 458  | 23846 |
| >tr A0A5F4D9S5 A0A5F4D9S5_CANLF Hyaluronoglucosaminidase OS=Canis lupus familiaris OX=9615 GN=CEMIP PE=3 SV=1                                   | 0.97 | 0.95 | 162.80 | 15884679.8 | 2  | 1 | 0 | 0.24  | 1684 | 9775  |
| >tr F1PL54 F1PL54_CANLF Olfactory receptor OS=Canis lupus familiaris OX=9615 GN=OR52E2B PE=3 SV=2                                               | 0.10 | 0.03 | 78.80  | 15785972.3 | 2  | 1 | 1 | 2.25  | 311  | 5515  |
| >tr E2R0G7 E2R0G7_CANLF DNA ligase OS=Canis lupus familiaris OX=9615 GN=LIG4 PE=3 SV=1                                                          | 0.14 | 0.10 | 45.30  | 15723919.3 | 3  | 1 | 0 | 0.55  | 911  | 29979 |
| >tr A0A5F4CCD0 A0A5F4CCD0_CANLF Cysteine rich secretory protein 2 OS=Canis lupus familiaris OX=9615 GN=CRISP2 PE=3 SV=1                         | 0.67 | 0.63 | 190.00 | 15676538.4 | 3  | 1 | 0 | 2.25  | 311  | 11017 |
| >tr F1PQU5 F1PQU5_CANLF Synaptic vesicle glycoprotein 2C OS=Canis lupus familiaris OX=9615 GN=SV2C PE=3 SV=2                                    | 0.60 | 0.58 | 75.90  | 15675333.5 | 2  | 1 | 0 | 2.76  | 724  | 12575 |
| >tr E2RNZ9 E2RNZ9_CANLF Tudor domain containing 9 OS=Canis lupus familiaris OX=9615 GN=TDRD9 PE=3 SV=3                                          | 0.19 | 0.17 | 21.10  | 15671460.2 | 2  | 1 | 0 | 0.59  | 1014 | 6293  |
| >tr F1PQN7 F1PQN7_CANLF Ankyrin repeat and BTB domain containing 2 OS=Canis lupus familiaris OX=9615 GN=ABTB2 PE=4 SV=2                         | 0.18 | 0.16 | 133.20 | 15514641.0 | 2  | 1 | 0 | 0.67  | 1188 | 42888 |
| >tr F1PJY1 F1PJY1_CANLF Mannosyl-glycoprotein endo-beta-N-acetylglucosaminidase OS=Canis lupus familiaris OX=9615 GN=ENGASE PE=3 SV=3           | 0.70 | 0.25 | 176.20 | 15431288.8 | 16 | 2 | 1 | 1.74  | 690  | 32761 |
| >tr E2RRE4 E2RRE4_CANLF Netrin 5 OS=Canis lupus familiaris OX=9615 GN=NTN5 PE=4 SV=3                                                            | 0.13 | 0.09 | 110.10 | 14965330.4 | 3  | 1 | 0 | 1.02  | 489  | 13410 |
| >tr Q9XSV4 Q9XSV4_CANLF CE10 protein OS=Canis lupus familiaris OX=9615 GN=ce10 PE=2 SV=1                                                        | 1.24 | 0.87 | 210.70 | 14879128.5 | 7  | 2 | 0 | 11.82 | 110  | 41542 |
| >tr F1PQU5 F1PQU5_CANLF Synaptic vesicle glycoprotein 2C OS=Canis lupus familiaris OX=9615 GN=SV2C PE=3 SV=2                                    | 0.59 | 0.57 | 90.90  | 14800364.2 | 2  | 1 | 0 | 2.76  | 724  | 12575 |
| >tr F1PFP6 F1PFP6_CANLF Matrix metalloproteinase 12 OS=Canis lupus familiaris OX=9615 GN=MMP12 PE=3 SV=3                                        | 0.37 | 0.37 | 80.20  | 14780824.2 | 1  | 1 | 0 | 2.44  | 491  | 24324 |
| >tr A0A5F4CU85 A0A5F4CU85_CANLF Leucyl-tRNA synthetase OS=Canis lupus familiaris OX=9615 GN=LARS1 PE=3 SV=1                                     | 0.13 | 0.13 | 47.70  | 14489099.0 | 1  | 1 | 0 | 1.01  | 1187 | 2068  |
| >tr A0A5F4D7Y5 A0A5F4D7Y5_CANLF Pleckstrin homology, MyTH4 and FERM domain containing H1 OS=Canis lupus familiaris OX=9615 GN=PLEKHH1 PE=4 SV=1 | 0.54 | 0.50 | 180.10 | 14432697.4 | 3  | 1 | 0 | 0.30  | 1342 | 5979  |
| >tr A0A5F4D9Z7 A0A5F4D9Z7_CANLF Zinc finger FYVE-type containing 19 OS=Canis lupus familiaris OX=9615 GN=ZFYVE19 PE=4 SV=1                      | 0.19 | 0.17 | 100.30 | 14347306.2 | 2  | 1 | 0 | 1.53  | 392  | 13875 |
| >sp P21842 CMA1_CANLF Chymase OS=Canis lupus familiaris OX=9615 GN=CMA1 PE=1 SV=1                                                               | 0.45 | 0.41 | 92.60  | 14291715.1 | 3  | 1 | 0 | 0.80  | 249  | 34    |
| >tr E2RJR2 E2RJR2_CANLF NADH:ubiquinone oxidoreductase subunit A9 OS=Canis lupus familiaris OX=9615 GN=NDUFA9 PE=4 SV=2                         | 0.10 | 0.02 | 31.90  | 14129329.5 | 3  | 1 | 1 | 5.31  | 377  | 3530  |
| >tr E2RJR2 E2RJR2_CANLF NADH:ubiquinone oxidoreductase subunit A9 OS=Canis lupus familiaris OX=9615 GN=NDUFA9 PE=4 SV=2                         | 0.20 | 0.20 | 5.90   | 13993368.2 | 1  | 1 | 1 | 5.31  | 377  | 3530  |
| >tr E2R967 E2R967_CANLF Tectonin beta-propeller repeat-containing protein 1 OS=Canis lupus familiaris OX=9615 GN=TECPR1 PE=3 SV=2               | 0.24 | 0.24 | 115.20 | 13869261.3 | 1  | 1 | 0 | 1.00  | 1303 | 18227 |

|                                                                                                                            |      |      |        |            |    |   |   |       |      |       |
|----------------------------------------------------------------------------------------------------------------------------|------|------|--------|------------|----|---|---|-------|------|-------|
| >tr J9NTK2 J9NTK2_CANLF J domain-containing protein OS=Canis lupus familiaris OX=9615 GN=DNAJC12 PE=4 SV=2                 | 0.23 | 0.21 | 160.30 | 13652893.2 | 2  | 1 | 0 | 4.72  | 106  | 2310  |
| >tr A0A5F4CF57 A0A5F4CF57_CANLF WD repeat domain 90 OS=Canis lupus familiaris OX=9615 GN=WDR90 PE=4 SV=1                   | 0.10 | 0.02 | 116.40 | 13631870.4 | 1  | 1 | 0 | 0.26  | 2322 | 3876  |
| >tr A0A5F4DFX0 A0A5F4DFX0_CANLF Exportin-T OS=Canis lupus familiaris OX=9615 GN=XPOT PE=3 SV=1                             | 0.26 | 0.18 | 141.70 | 13567998.2 | 5  | 1 | 0 | 0.75  | 938  | 2329  |
| >sp Q28895 NPC2_CANLF NPC intracellular cholesterol transporter 2 OS=Canis lupus familiaris OX=9615 GN=NPC2 PE=2 SV=1      | 6.65 | 6.35 | 427.00 | 12973006.0 | 16 | 1 | 0 | 15.44 | 149  | 153   |
| >sp P49822 ALBU_CANLF Albumin OS=Canis lupus familiaris OX=9615 GN=ALB PE=1 SV=3                                           | 9.81 | 3.92 | 287.80 | 12969291.6 | 13 | 6 | 1 | 11.51 | 608  | 490   |
| >tr F1P8J6 F1P8J6_CANLF RNA helicase OS=Canis lupus familiaris OX=9615 GN=DDX55 PE=3 SV=3                                  | 0.35 | 0.35 | 138.80 | 12899574.5 | 1  | 1 | 0 | 1.58  | 568  | 8934  |
| >tr J9NS29 J9NS29_CANLF Cystatin domain-containing protein OS=Canis lupus familiaris OX=9615 GN=LOC607874 PE=4 SV=2        | 0.85 | 0.76 | 194.70 | 12812353.1 | 2  | 2 | 0 | 5.11  | 313  | 30016 |
| >tr A0A5F4C9T7 A0A5F4C9T7_CANLF Telomerase associated protein 1 OS=Canis lupus familiaris OX=9615 GN=TEP1 PE=4 SV=1        | 0.61 | 0.57 | 214.40 | 12659890.7 | 3  | 1 | 0 | 0.16  | 2507 | 891   |
| >sp Q28346 RL4_CANLF 60S ribosomal protein L4 OS=Canis lupus familiaris OX=9615 GN=RPL4 PE=1 SV=2                          | 0.35 | 0.31 | 47.90  | 12659890.7 | 3  | 1 | 0 | 0.48  | 421  | 168   |
| >tr A0A5F4CCD0 A0A5F4CCD0_CANLF Cysteine rich secretory protein 2 OS=Canis lupus familiaris OX=9615 GN=CRISP2 PE=3 SV=1    | 0.63 | 0.61 | 84.30  | 12651840.7 | 2  | 1 | 0 | 4.82  | 311  | 11017 |
| >tr F1PCU5 F1PCU5_CANLF Methyltransf_11 domain-containing protein OS=Canis lupus familiaris OX=9615 GN=LOC480074 PE=4 SV=3 | 0.21 | 0.21 | 51.60  | 12622318.7 | 1  | 1 | 0 | 2.86  | 630  | 1484  |
| >tr E2RF35 E2RF35_CANLF Calcium-transporting ATPase OS=Canis lupus familiaris OX=9615 GN=ATP2B2 PE=3 SV=2                  | 0.60 | 0.58 | 13.10  | 12411099.2 | 2  | 1 | 0 | 2.49  | 1243 | 27151 |
| >tr A0A5F4BT89 A0A5F4BT89_CANLF Olfactory receptor OS=Canis lupus familiaris OX=9615 GN=OR5W6 PE=3 SV=1                    | 0.10 | 0.01 | 91.80  | 12092954.6 | 2  | 1 | 1 | 6.95  | 302  | 29923 |
| >tr F1PFP6 F1PFP6_CANLF Matrix metallopeptidase 12 OS=Canis lupus familiaris OX=9615 GN=MMP12 PE=3 SV=3                    | 0.30 | 0.28 | 63.70  | 12011017.0 | 2  | 1 | 0 | 2.44  | 491  | 24324 |
| >tr A0A5F4C4H6 A0A5F4C4H6_CANLF Biliverdin reductase A OS=Canis lupus familiaris OX=9615 GN=BLVRA PE=4 SV=1                | 0.10 | 0.07 | 106.70 | 11996867.4 | 2  | 1 | 0 | 3.49  | 401  | 15382 |
| >tr A0A5F4CRH0 A0A5F4CRH0_CANLF Ceruloplasmin OS=Canis lupus familiaris OX=9615 GN=CP PE=3 SV=1                            | 0.36 | 0.34 | 128.00 | 11920452.2 | 2  | 1 | 0 | 1.41  | 1063 | 2330  |
| >tr J9P2D3 J9P2D3_CANLF Alpha kinase 3 OS=Canis lupus familiaris OX=9615 GN=ALPK3 PE=4 SV=2                                | 0.32 | 0.24 | 190.30 | 11794790.9 | 5  | 1 | 0 | 0.31  | 1616 | 5104  |
| >tr A0A5F4CLI1 A0A5F4CLI1_CANLF Histone deacetylase 6 OS=Canis lupus familiaris OX=9615 GN=HDAC6 PE=4 SV=1                 | 0.47 | 0.47 | 177.60 | 11764224.7 | 1  | 1 | 0 | 0.43  | 1175 | 4057  |
| >tr A0A5F4CXX5 A0A5F4CXX5_CANLF Carboxypeptidase OS=Canis lupus familiaris OX=9615 GN=CTSA PE=3 SV=1                       | 0.36 | 0.36 | 133.00 | 11745399.0 | 1  | 1 | 0 | 2.27  | 485  | 3309  |
| >tr F1PBJ1 F1PBJ1_CANLF Methylcytosine dioxygenase TET OS=Canis lupus familiaris OX=9615 GN=TET3 PE=3 SV=2                 | 0.10 | 0.02 | 66.10  | 11476539.9 | 4  | 1 | 0 | 0.28  | 1795 | 1529  |
| >tr J9NS29 J9NS29_CANLF Cystatin domain-containing protein OS=Canis lupus familiaris OX=9615 GN=LOC607874 PE=4 SV=2        | 0.35 | 0.33 | 146.80 | 11441647.2 | 2  | 1 | 0 | 6.39  | 313  | 30016 |
| >tr F1PHA9 F1PHA9_CANLF Motile sperm domain containing 2 OS=Canis lupus familiaris OX=9615 GN=MOSPD2 PE=4 SV=3             | 0.33 | 0.31 | 158.30 | 11391947.3 | 2  | 1 | 0 | 0.97  | 518  | 10201 |

|                                                                                                                                                   |      |      |        |            |   |   |   |       |      |       |
|---------------------------------------------------------------------------------------------------------------------------------------------------|------|------|--------|------------|---|---|---|-------|------|-------|
| >tr F1PHV9 F1PHV9_CANLF Tetratricopeptide repeat domain 28 OS=Canis lupus familiaris<br>OX=9615 GN=TTC28 PE=4 SV=2                                | 1.17 | 1.17 | 51.50  | 11325246.8 | 1 | 1 | 0 | 0.77  | 2469 | 14555 |
| >tr A0A5F4D6G2 A0A5F4D6G2_CANLF SMG7 nonsense mediated mRNA decay factor<br>OS=Canis lupus familiaris OX=9615 GN=SMG7 PE=4 SV=1                   | 0.73 | 0.71 | 153.60 | 11313777.9 | 2 | 1 | 0 | 0.43  | 1175 | 2075  |
| >tr E2R3X1 E2R3X1_CANLF Rho GTPase activating protein 10 OS=Canis lupus familiaris<br>OX=9615 GN=ARHGAP10 PE=4 SV=3                               | 0.35 | 0.35 | 86.10  | 11254295.2 | 1 | 1 | 1 | 0.80  | 754  | 33789 |
| >tr J9P758 J9P758_CANLF Sorcin OS=Canis lupus familiaris OX=9615 GN=SRI PE=4 SV=2                                                                 | 0.57 | 0.57 | 155.50 | 11097658.5 | 1 | 1 | 0 | 2.30  | 348  | 7242  |
| >tr J9P5T2 J9P5T2_CANLF Non-specific serine/threonine protein kinase OS=Canis lupus<br>familiaris OX=9615 GN=WNK3 PE=4 SV=2                       | 0.10 | 0.01 | 55.10  | 11038696.0 | 4 | 1 | 0 | 0.22  | 2294 | 5229  |
| >tr A0A5F4DCA4 A0A5F4DCA4_CANLF Reverse transcriptase domain-containing protein<br>OS=Canis lupus familiaris OX=9615 PE=4 SV=1                    | 0.36 | 0.34 | 171.20 | 10943713.1 | 2 | 1 | 0 | 0.31  | 978  | 860   |
| >tr A0A5F4CGE0 A0A5F4CGE0_CANLF Ubiquitin protein ligase E3C OS=Canis lupus<br>familiaris OX=9615 GN=UBE3C PE=4 SV=1                              | 0.68 | 0.68 | 164.60 | 10766689.9 | 1 | 1 | 0 | 0.97  | 1238 | 9018  |
| >tr J9NT31 J9NT31_CANLF Thymocyte selection associated family member 2 OS=Canis lupus<br>familiaris OX=9615 GN=THEMIS2 PE=3 SV=1                  | 0.17 | 0.03 | 26.60  | 10738555.4 | 8 | 1 | 0 | 0.78  | 642  | 9120  |
| >tr E2RTL2 E2RTL2_CANLF Tubulin tyrosine ligase like 6 OS=Canis lupus familiaris<br>OX=9615 GN=TTLL6 PE=4 SV=3                                    | 0.14 | 0.12 | 52.50  | 10731031.9 | 2 | 1 | 0 | 0.60  | 827  | 2703  |
| >tr A0A5F4CAH2 A0A5F4CAH2_CANLF RNA polymerase II subunit A C-terminal domain<br>phosphatase OS=Canis lupus familiaris OX=9615 GN=CTDP1 PE=4 SV=1 | 0.19 | 0.19 | 101.50 | 10684469.1 | 1 | 1 | 0 | 0.74  | 945  | 14396 |
| >sp Q5TJE1 DAXX_CANLF Death domain-associated protein 6 OS=Canis lupus familiaris<br>OX=9615 GN=DAXX PE=3 SV=1                                    | 0.46 | 0.44 | 155.70 | 10620387.5 | 2 | 1 | 0 | 0.41  | 737  | 429   |
| >tr F1PCL0 F1PCL0_CANLF DNL-type zinc finger OS=Canis lupus familiaris OX=9615<br>GN=DNLZ PE=4 SV=2                                               | 0.10 | 0.05 | 104.90 | 10584036.3 | 2 | 2 | 2 | 5.26  | 171  | 2400  |
| >tr I6MS72 I6MS72_CANLF Early lactation protein OS=Canis lupus familiaris OX=9615<br>GN=ELP PE=2 SV=1                                             | 0.13 | 0.13 | 34.40  | 10550443.2 | 1 | 1 | 0 | 21.00 | 100  | 41650 |
| >tr F1PS80 F1PS80_CANLF Protein phosphatase 4 regulatory subunit 1 OS=Canis lupus<br>familiaris OX=9615 GN=PPP4R1 PE=4 SV=3                       | 0.37 | 0.36 | 51.30  | 10433783.3 | 3 | 1 | 0 | 0.56  | 887  | 2666  |
| >tr A0A5F4D6G2 A0A5F4D6G2_CANLF SMG7 nonsense mediated mRNA decay factor<br>OS=Canis lupus familiaris OX=9615 GN=SMG7 PE=4 SV=1                   | 0.43 | 0.41 | 251.70 | 10417728.2 | 2 | 1 | 0 | 0.43  | 1175 | 2075  |
| >tr A0A5F4CGE0 A0A5F4CGE0_CANLF Ubiquitin protein ligase E3C OS=Canis lupus<br>familiaris OX=9615 GN=UBE3C PE=4 SV=1                              | 0.37 | 0.37 | 169.40 | 10413794.3 | 1 | 1 | 0 | 0.97  | 1238 | 9018  |
| >tr A0A5K1V0D8 A0A5K1V0D8_CANLF Sulfatase 2 OS=Canis lupus familiaris OX=9615<br>GN=SULF2 PE=3 SV=1                                               | 0.36 | 0.32 | 191.40 | 10406737.4 | 3 | 1 | 0 | 0.35  | 859  | 1192  |
| >tr A0A5F4DCA4 A0A5F4DCA4_CANLF Reverse transcriptase domain-containing protein<br>OS=Canis lupus familiaris OX=9615 PE=4 SV=1                    | 0.32 | 0.30 | 125.50 | 10372354.2 | 2 | 1 | 0 | 0.31  | 978  | 860   |
| >sp Q9XT60 SRY_CANLF Sex-determining region Y protein OS=Canis lupus familiaris<br>OX=9615 GN=SR Y PE=3 SV=1                                      | 0.17 | 0.03 | 27.80  | 10356106.0 | 8 | 1 | 0 | 2.27  | 220  | 347   |
| >tr J9NS29 J9NS29_CANLF Cystatin domain-containing protein OS=Canis lupus familiaris<br>OX=9615 GN=LOC607874 PE=4 SV=2                            | 0.80 | 0.78 | 178.20 | 10239116.2 | 2 | 1 | 0 | 6.39  | 313  | 30016 |
| >tr J9NT31 J9NT31_CANLF Thymocyte selection associated family member 2 OS=Canis lupus<br>familiaris OX=9615 GN=THEMIS2 PE=3 SV=1                  | 0.53 | 0.39 | 42.50  | 10171395.0 | 8 | 1 | 0 | 0.78  | 642  | 9120  |
| >tr A0A5F4C7W7 A0A5F4C7W7_CANLF Phosphatidylinositol-4,5-bisphosphate 3-kinase<br>OS=Canis lupus familiaris OX=9615 GN=PIK3CD PE=3 SV=1           | 0.20 | 0.20 | 106.70 | 10088526.5 | 2 | 1 | 0 | 1.52  | 1051 | 18533 |
| >tr A0A5F4D7J3 A0A5F4D7J3_CANLF Non-specific serine/threonine protein kinase OS=Canis<br>lupus familiaris OX=9615 GN=CDC42BPA PE=3 SV=1           | 1.04 | 1.04 | 189.50 | 10078853.4 | 2 | 2 | 1 | 0.39  | 1794 | 1069  |

|                                                                                                                                                 |      |      |        |            |    |   |   |       |      |       |
|-------------------------------------------------------------------------------------------------------------------------------------------------|------|------|--------|------------|----|---|---|-------|------|-------|
| >tr F1Q2F6 F1Q2F6_CANLF 3-hydroxyacyl-[acyl-carrier-protein] dehydratase OS=Canis lupus familiaris OX=9615 GN=FASN PE=4 SV=3                    | 0.80 | 0.78 | 173.90 | 10047512.1 | 2  | 1 | 0 | 0.40  | 2478 | 22936 |
| >tr A0A5F4DCA4 A0A5F4DCA4_CANLF Reverse transcriptase domain-containing protein OS=Canis lupus familiaris OX=9615 PE=4 SV=1                     | 0.86 | 0.84 | 161.30 | 10047150.0 | 2  | 1 | 0 | 0.31  | 978  | 860   |
| >tr F6Y091 F6Y091_CANLF Olfactory receptor OS=Canis lupus familiaris OX=9615 GN=OR13C2 PE=3 SV=1                                                | 0.10 | 0.01 | 31.10  | 10029599.6 | 8  | 1 | 1 | 1.26  | 318  | 2117  |
| >tr F1PXW1 F1PXW1_CANLF Proteasome activator subunit 4 OS=Canis lupus familiaris OX=9615 GN=PSME4 PE=3 SV=3                                     | 1.02 | 1.02 | 164.60 | 9951003.8  | 2  | 2 | 1 | 0.74  | 1762 | 4363  |
| >sp P21842 CMA1_CANLF Chymase OS=Canis lupus familiaris OX=9615 GN=CMA1 PE=1 SV=1                                                               | 1.17 | 1.15 | 100.40 | 9570435.8  | 2  | 1 | 0 | 0.80  | 249  | 34    |
| >tr A0A5F4D6L9 A0A5F4D6L9_CANLF Sacsin molecular chaperone OS=Canis lupus familiaris OX=9615 GN=SACS PE=4 SV=1                                  | 0.84 | 0.82 | 206.60 | 9407695.2  | 2  | 1 | 0 | 0.09  | 4500 | 1444  |
| >tr F1PLT8 F1PLT8_CANLF Sulfhydryl oxidase OS=Canis lupus familiaris OX=9615 GN=QSOX1 PE=3 SV=3                                                 | 0.15 | 0.13 | 141.50 | 9369012.1  | 2  | 1 | 0 | 2.46  | 568  | 33056 |
| >tr Q9XSV4 Q9XSV4_CANLF CE10 protein OS=Canis lupus familiaris OX=9615 GN=ce10 PE=2 SV=1                                                        | 2.13 | 1.12 | 244.50 | 9261502.1  | 20 | 2 | 0 | 9.09  | 110  | 41542 |
| >tr A0A5F4C7X6 A0A5F4C7X6_CANLF Nucleoporin 58 OS=Canis lupus familiaris OX=9615 GN=NUP58 PE=4 SV=1                                             | 0.10 | 0.09 | 34.10  | 9211896.3  | 1  | 1 | 1 | 3.12  | 544  | 8520  |
| >tr E2RJF6 E2RJF6_CANLF Mortality factor 4 like 1 OS=Canis lupus familiaris OX=9615 GN=MORF4L1 PE=4 SV=3                                        | 0.19 | 0.19 | 26.30  | 9211896.3  | 1  | 1 | 0 | 4.56  | 439  | 18584 |
| >sp Q9XSU7 RL27_CANLF 60S ribosomal protein L27 OS=Canis lupus familiaris OX=9615 GN=RPL27 PE=2 SV=3                                            | 0.10 | 0.03 | 46.70  | 9007219.1  | 10 | 1 | 0 | 3.68  | 136  | 314   |
| >tr F1PR47 F1PR47_CANLF DNA replication licensing factor MCM2 OS=Canis lupus familiaris OX=9615 GN=MCM2 PE=3 SV=3                               | 0.28 | 0.24 | 196.50 | 8440132.5  | 3  | 1 | 0 | 0.57  | 881  | 9370  |
| >tr A0A5F4CCY0 A0A5F4CCY0_CANLF Programmed cell death 11 OS=Canis lupus familiaris OX=9615 GN=PDCD11 PE=4 SV=1                                  | 0.90 | 0.88 | 222.40 | 8439515.1  | 2  | 1 | 0 | 0.22  | 1829 | 1406  |
| >tr F1PJY1 F1PJY1_CANLF Mannosyl-glycoprotein endo-beta-N-acetylglucosaminidase OS=Canis lupus familiaris OX=9615 GN=ENGASE PE=3 SV=3           | 1.58 | 0.84 | 181.80 | 8387507.9  | 9  | 3 | 2 | 1.74  | 690  | 32761 |
| >tr F1PR54 F1PR54_CANLF Lactotransferrin OS=Canis lupus familiaris OX=9615 GN=LTF PE=3 SV=1                                                     | 5.16 | 2.71 | 274.00 | 8022453.1  | 17 | 3 | 0 | 5.08  | 708  | 40436 |
| >sp F1PRN2 MYO1D_CANLF Unconventional myosin-IId OS=Canis lupus familiaris OX=9615 GN=MYO1D PE=1 SV=2                                           | 0.69 | 0.63 | 117.8  | 7978788.7  | 4  | 1 | 0 | 0.3   | 1006 | 763   |
| >tr J9P432 J9P432_CANLF Glutamine--fructose-6-phosphate transaminase (isomerizing) OS=Canis lupus familiaris OX=9615 GN=GFPT1 PE=4 SV=2         | 0.79 | 0.73 | 107.30 | 7976954.0  | 4  | 1 | 0 | 1.18  | 677  | 7191  |
| >tr A0A5F4D7Y5 A0A5F4D7Y5_CANLF Pleckstrin homology, MyTH4 and FERM domain containing H1 OS=Canis lupus familiaris OX=9615 GN=PLEKHH1 PE=4 SV=1 | 0.35 | 0.35 | 212.90 | 7955527.8  | 1  | 1 | 0 | 0.30  | 1342 | 5979  |
| >tr E2R6E0 E2R6E0_CANLF Lipocln_cytosolic_FA-bd_dom domain-containing protein OS=Canis lupus familiaris OX=9615 GN=LCNL1 PE=3 SV=2              | 2.12 | 2.12 | 199.40 | 7947178.4  | 1  | 1 | 0 | 3.68  | 299  | 1932  |
| >tr A0A5F4DDV9 A0A5F4DDV9_CANLF Actin alpha 2, smooth muscle OS=Canis lupus familiaris OX=9615 GN=ACTA2 PE=3 SV=1                               | 0.55 | 0.55 | 103.00 | 7906270.6  | 1  | 1 | 1 | 10.16 | 374  | 9804  |
| >tr A0A5F4D7J3 A0A5F4D7J3_CANLF Non-specific serine/threonine protein kinase OS=Canis lupus familiaris OX=9615 GN=CDC42BPA PE=3 SV=1            | 0.10 | 0.02 | 61.10  | 7884672.7  | 3  | 1 | 1 | 0.17  | 1794 | 1069  |
| >sp Q9XSU7 RL27_CANLF 60S ribosomal protein L27 OS=Canis lupus familiaris OX=9615 GN=RPL27 PE=2 SV=3                                            | 0.10 | 0.00 | 6.40   | 7845848.0  | 3  | 1 | 0 | 3.68  | 136  | 314   |

|                                                                                                                                           |      |      |        |           |   |   |   |      |      |       |
|-------------------------------------------------------------------------------------------------------------------------------------------|------|------|--------|-----------|---|---|---|------|------|-------|
| >tr A0A5F4D8I6 A0A5F4D8I6_CANLF Phospholipase A2 receptor 1 OS=Canis lupus familiaris OX=9615 GN=PLA2R1 PE=4 SV=1                         | 0.73 | 0.71 | 131.10 | 7673585.8 | 2 | 1 | 0 | 0.50 | 1394 | 6796  |
| >tr F6V8I0 F6V8I0_CANLF Melanophilin OS=Canis lupus familiaris OX=9615 GN=MLPH PE=4 SV=2                                                  | 0.11 | 0.09 | 148.90 | 7616201.3 | 2 | 1 | 0 | 1.46 | 549  | 10015 |
| >tr F1PB68 F1PB68_CANLF Olfactomedin 4 OS=Canis lupus familiaris OX=9615 GN=OLFM4 PE=4 SV=3                                               | 0.47 | 0.47 | 24.80  | 7551009.1 | 1 | 1 | 0 | 4.40 | 477  | 17246 |
| >tr F1PED7 F1PED7_CANLF Poly [ADP-ribose] polymerase OS=Canis lupus familiaris OX=9615 GN=PARP3 PE=4 SV=2                                 | 0.59 | 0.59 | 115.10 | 7523536.3 | 1 | 1 | 0 | 2.07 | 531  | 21143 |
| >tr E2RE16 E2RE16_CANLF Non-specific serine/threonine protein kinase OS=Canis lupus familiaris OX=9615 GN=PAK4 PE=4 SV=1                  | 0.16 | 0.02 | 18.10  | 7522447.4 | 8 | 1 | 0 | 0.84 | 592  | 12735 |
| >tr J9NZJ2 J9NZJ2_CANLF Protein Wnt OS=Canis lupus familiaris OX=9615 GN=WNT6 PE=3 SV=2                                                   | 0.85 | 0.85 | 268.20 | 7516265.4 | 1 | 1 | 0 | 1.47 | 339  | 11134 |
| >tr F1P9S9 F1P9S9_CANLF MutS homolog 3 OS=Canis lupus familiaris OX=9615 GN=MSH3 PE=3 SV=3                                                | 0.22 | 0.22 | 118.10 | 7514485.2 | 1 | 1 | 0 | 1.04 | 1058 | 29932 |
| >tr F1PPP9 F1PPP9_CANLF Family with sequence similarity 135 member A OS=Canis lupus familiaris OX=9615 GN=FAM135A PE=3 SV=3               | 0.37 | 0.27 | 121.60 | 7426745.5 | 6 | 1 | 0 | 1.22 | 1399 | 6815  |
| >tr A0A5F4D8I6 A0A5F4D8I6_CANLF Phospholipase A2 receptor 1 OS=Canis lupus familiaris OX=9615 GN=PLA2R1 PE=4 SV=1                         | 0.15 | 0.13 | 110.40 | 7385920.1 | 2 | 1 | 0 | 0.50 | 1394 | 6796  |
| >tr F1PL54 F1PL54_CANLF Olfactory receptor OS=Canis lupus familiaris OX=9615 GN=OR52E2B PE=3 SV=2                                         | 0.11 | 0.11 | 115.20 | 7290701.6 | 1 | 1 | 1 | 2.25 | 311  | 5515  |
| >tr A0A5F4D9R8 A0A5F4D9R8_CANLF Transcription factor CP2 OS=Canis lupus familiaris OX=9615 GN=TFCP2 PE=3 SV=1                             | 0.90 | 0.90 | 31.50  | 7139238.5 | 1 | 1 | 0 | 3.15 | 508  | 12674 |
| >tr E2QWH7 E2QWH7_CANLF Coiled-coil domain containing 127 OS=Canis lupus familiaris OX=9615 GN=CCDC127 PE=4 SV=3                          | 0.10 | 0.09 | 66.80  | 7137123.7 | 1 | 1 | 0 | 3.34 | 479  | 28521 |
| >tr A0A5F4CXA7 A0A5F4CXA7_CANLF Maestro heat like repeat family member 9 OS=Canis lupus familiaris OX=9615 GN=MROH9 PE=4 SV=1             | 0.10 | 0.08 | 25.70  | 6962114.9 | 1 | 1 | 0 | 2.40 | 791  | 40674 |
| >tr A0A5F4CXA7 A0A5F4CXA7_CANLF Maestro heat like repeat family member 9 OS=Canis lupus familiaris OX=9615 GN=MROH9 PE=4 SV=1             | 0.33 | 0.33 | 10.80  | 6936616.2 | 1 | 1 | 0 | 2.40 | 791  | 40674 |
| >tr A0A5F4D6L9 A0A5F4D6L9_CANLF Sacsin molecular chaperone OS=Canis lupus familiaris OX=9615 GN=SACS PE=4 SV=1                            | 0.26 | 0.22 | 231.10 | 6907424.1 | 3 | 1 | 0 | 0.09 | 4500 | 1444  |
| >sp F1PZV2 MFS12_CANLF Major facilitator superfamily domain-containing protein 12 OS=Canis lupus familiaris OX=9615 GN=MFS12 PE=1 SV=3    | 0.15 | 0.15 | 14.80  | 6879602.3 | 1 | 1 | 1 | 5.23 | 478  | 230   |
| >tr A0A5F4C8H3 A0A5F4C8H3_CANLF Glycerol-3-phosphate acyltransferase 1, mitochondrial OS=Canis lupus familiaris OX=9615 GN=GPAM PE=3 SV=1 | 0.79 | 0.76 | 106.90 | 6793061.6 | 2 | 2 | 1 | 2.63 | 837  | 11048 |
| >tr A0A5F4DFY1 A0A5F4DFY1_CANLF SHH signaling and ciliogenesis regulator SDCCAG8 OS=Canis lupus familiaris OX=9615 GN=SDCCAG8 PE=4 SV=1   | 0.14 | 0.08 | 14.80  | 6735716.6 | 4 | 1 | 1 | 0.59 | 673  | 17765 |
| >tr E2RRE4 E2RRE4_CANLF Netrin 5 OS=Canis lupus familiaris OX=9615 GN=NTN5 PE=4 SV=3                                                      | 0.16 | 0.14 | 125.30 | 6676765.0 | 2 | 1 | 0 | 1.02 | 489  | 13410 |
| >sp F1PRN2 MYO1D_CANLF Unconventional myosin-IId OS=Canis lupus familiaris OX=9615 GN=MYO1D PE=1 SV=2                                     | 0.61 | 0.58 | 156.40 | 6493781.8 | 3 | 1 | 0 | 0.30 | 1006 | 763   |
| >tr J9P432 J9P432_CANLF Glutamine--fructose-6-phosphate transaminase (isomerizing) OS=Canis lupus familiaris OX=9615 GN=GFPT1 PE=4 SV=2   | 0.23 | 0.23 | 53.50  | 6457411.5 | 1 | 1 | 0 | 1.18 | 677  | 7191  |
| >tr F1PSL8 F1PSL8_CANLF Matrix metalloproteinase 11 OS=Canis lupus familiaris OX=9615 GN=MMP11 PE=3 SV=3                                  | 0.39 | 0.37 | 65.90  | 6400593.3 | 2 | 1 | 1 | 1.86 | 485  | 3125  |

|                                                                                                                                        |      |      |        |           |   |   |   |      |      |       |
|----------------------------------------------------------------------------------------------------------------------------------------|------|------|--------|-----------|---|---|---|------|------|-------|
| >tr E2RA54 E2RA54_CANLF Bromodomain and WD repeat domain containing 3 OS=Canis lupus familiaris OX=9615 GN=BRWD3 PE=4 SV=3             | 0.10 | 0.02 | 48.20  | 6352116.0 | 2 | 1 | 0 | 0.29 | 1750 | 4294  |
| >tr F1PFP6 F1PFP6_CANLF Matrix metalloproteinase 12 OS=Canis lupus familiaris OX=9615 GN=MMP12 PE=3 SV=3                               | 0.10 | 0.02 | 95.60  | 6344627.9 | 1 | 1 | 0 | 2.44 | 491  | 24324 |
| >tr J9NTK2 J9NTK2_CANLF J domain-containing protein OS=Canis lupus familiaris OX=9615 GN=DNAJC12 PE=4 SV=2                             | 0.10 | 0.02 | 142.00 | 6310985.1 | 1 | 1 | 0 | 4.72 | 106  | 2310  |
| >tr J9P9K7 J9P9K7_CANLF Glycylpeptide N-tetradecanoyltransferase OS=Canis lupus familiaris OX=9615 GN=NMT2 PE=3 SV=2                   | 0.32 | 0.32 | 59.00  | 6229770.5 | 1 | 1 | 0 | 3.16 | 507  | 19368 |
| >tr A0A5F4CR67 A0A5F4CR67_CANLF Methyl-CpG-binding protein 2 OS=Canis lupus familiaris OX=9615 GN=MECP2 PE=4 SV=1                      | 0.10 | 0.09 | 126.10 | 6188853.7 | 1 | 1 | 1 | 2.41 | 498  | 1334  |
| >tr J9NZH4 J9NZH4_CANLF NTR domain-containing protein OS=Canis lupus familiaris OX=9615 GN=LOC102154527 PE=3 SV=2                      | 0.10 | 0.10 | 53.10  | 6165021.7 | 1 | 1 | 0 | 8.60 | 221  | 39505 |
| >tr F6XAZ8 F6XAZ8_CANLF Dispatched RND transporter family member 1 OS=Canis lupus familiaris OX=9615 GN=DISP1 PE=4 SV=2                | 0.10 | 0.06 | 57.90  | 6150747.1 | 1 | 1 | 1 | 1.01 | 1485 | 5621  |
| >sp O18840 ACTB_CANLF Actin, cytoplasmic 1 OS=Canis lupus familiaris OX=9615 GN=ACTB PE=2 SV=3                                         | 0.30 | 0.24 | 150.00 | 6127412.6 | 4 | 1 | 0 | 2.93 | 375  | 642   |
| >tr A0A5F4CP99 A0A5F4CP99_CANLF CD109 molecule OS=Canis lupus familiaris OX=9615 GN=CD109 PE=3 SV=1                                    | 0.57 | 0.57 | 50.60  | 6058965.5 | 1 | 1 | 0 | 1.84 | 1520 | 4665  |
| >sp Q6UR05 MRP1_CANLF Multidrug resistance-associated protein 1 OS=Canis lupus familiaris OX=9615 GN=ABCC1 PE=1 SV=1                   | 0.24 | 0.20 | 115.80 | 6036770.1 | 3 | 1 | 0 | 0.13 | 1531 | 259   |
| >tr F1PY73 F1PY73_CANLF SMG6 nonsense mediated mRNA decay factor OS=Canis lupus familiaris OX=9615 GN=SMG6 PE=4 SV=2                   | 0.34 | 0.34 | 82.70  | 6024611.4 | 1 | 1 | 0 | 1.42 | 1412 | 40090 |
| >tr A0A5F4CJ52 A0A5F4CJ52_CANLF Beta-galactosidase OS=Canis lupus familiaris OX=9615 GN=GLB1 PE=3 SV=1                                 | 0.36 | 0.36 | 104.40 | 5983799.0 | 1 | 1 | 0 | 0.53 | 946  | 3892  |
| >tr A0A5F4CKD5 A0A5F4CKD5_CANLF Polypeptide N-acetylglucosaminyltransferase OS=Canis lupus familiaris OX=9615 GN=GALNT6 PE=3 SV=1      | 0.69 | 0.69 | 115.90 | 5950260.1 | 1 | 1 | 0 | 1.71 | 644  | 1617  |
| >sp Q9XSU7 RL27_CANLF 60S ribosomal protein L27 OS=Canis lupus familiaris OX=9615 GN=RPL27 PE=2 SV=3                                   | 0.12 | 0.02 | 16.60  | 5923851.1 | 6 | 1 | 0 | 3.68 | 136  | 314   |
| >sp P50996 ATP4A_CANLF Potassium-transporting ATPase alpha chain 1 OS=Canis lupus familiaris OX=9615 GN=ATP4A PE=2 SV=3                | 0.55 | 0.55 | 38.40  | 5902147.9 | 1 | 1 | 1 | 2.90 | 1034 | 672   |
| >tr F1PQM0 F1PQM0_CANLF BAH domain and coiled-coil containing 1 OS=Canis lupus familiaris OX=9615 GN=BAHCC1 PE=4 SV=3                  | 0.63 | 0.63 | 124.40 | 5873788.6 | 1 | 1 | 1 | 0.43 | 2565 | 10908 |
| >tr J9NS29 J9NS29_CANLF Cystatin domain-containing protein OS=Canis lupus familiaris OX=9615 GN=LOC607874 PE=4 SV=2                    | 0.21 | 0.21 | 111.00 | 5867607.9 | 1 | 1 | 0 | 6.39 | 313  | 30016 |
| >tr A0A5F4CCD0 A0A5F4CCD0_CANLF Cysteine rich secretory protein 2 OS=Canis lupus familiaris OX=9615 GN=CRISP2 PE=3 SV=1                | 0.24 | 0.20 | 127.90 | 5859721.0 | 3 | 1 | 0 | 4.82 | 311  | 11017 |
| >sp O97758 ZO1_CANLF Tight junction protein ZO-1 OS=Canis lupus familiaris OX=9615 GN=TJP1 PE=1 SV=1                                   | 0.71 | 0.71 | 7.50   | 5843550.4 | 1 | 1 | 0 | 0.28 | 1769 | 139   |
| >tr A0A5F4C9R3 A0A5F4C9R3_CANLF Ubiquitin protein ligase E3 component n-recognin 5 OS=Canis lupus familiaris OX=9615 GN=UBR5 PE=4 SV=1 | 0.70 | 0.71 | 150.00 | 5770903.4 | 1 | 1 | 0 | 0.18 | 2714 | 3284  |
| >tr F6XN72 F6XN72_CANLF Leucine rich repeat containing 71 OS=Canis lupus familiaris OX=9615 GN=LRRC71 PE=4 SV=1                        | 0.10 | 0.06 | 105.20 | 5739592.9 | 1 | 1 | 1 | 1.96 | 560  | 34087 |
| >tr F1PFZ5 F1PFZ5_CANLF Milk fat globule EGF and factor V/VIII domain containing OS=Canis lupus familiaris OX=9615 GN=MFG8 PE=4 SV=3   | 1.84 | 1.84 | 231.40 | 5675948.1 | 1 | 1 | 0 | 1.87 | 428  | 7079  |

|                                                                                                                                                     |      |      |        |           |   |   |   |      |      |       |
|-----------------------------------------------------------------------------------------------------------------------------------------------------|------|------|--------|-----------|---|---|---|------|------|-------|
| >tr A0A5F4D7J3 A0A5F4D7J3_CANLF Non-specific serine/threonine protein kinase OS=Canis lupus familiaris OX=9615 GN=CDC42BPA PE=3 SV=1                | 0.85 | 0.85 | 235.30 | 5675005.7 | 1 | 1 | 0 | 0.22 | 1794 | 1069  |
| >tr J9P539 J9P539_CANLF Telomeric repeat-binding factor OS=Canis lupus familiaris OX=9615 GN=TERF1 PE=4 SV=2                                        | 0.10 | 0.07 | 98.60  | 5673217.6 | 1 | 1 | 1 | 2.66 | 413  | 7133  |
| >tr A0A5F4BRN6 A0A5F4BRN6_CANLF Class II major histocompatibility complex transactivator OS=Canis lupus familiaris OX=9615 GN=CIITA PE=4 SV=1       | 0.60 | 0.60 | 179.40 | 5590030.8 | 1 | 1 | 0 | 0.34 | 1191 | 5452  |
| >tr F1P9L4 F1P9L4_CANLF Dual-specificity kinase OS=Canis lupus familiaris OX=9615 GN=DYRK1A PE=3 SV=3                                               | 0.44 | 0.44 | 88.90  | 5578141.7 | 1 | 1 | 0 | 0.52 | 762  | 4349  |
| >tr F1PG90 F1PG90_CANLF Leucine rich repeat LGI family member 3 OS=Canis lupus familiaris OX=9615 GN=LGI3 PE=4 SV=3                                 | 0.10 | 0.07 | 74.00  | 5562585.2 | 1 | 1 | 0 | 0.73 | 548  | 1276  |
| >tr J9NS29 J9NS29_CANLF Cystatin domain-containing protein OS=Canis lupus familiaris OX=9615 GN=LOC607874 PE=4 SV=2                                 | 0.68 | 0.68 | 183.50 | 5535283.6 | 1 | 1 | 0 | 6.39 | 313  | 30016 |
| >tr A0A5F4D9S5 A0A5F4D9S5_CANLF Hyaluronoglucosaminidase OS=Canis lupus familiaris OX=9615 GN=CEMIP PE=3 SV=1                                       | 0.44 | 0.42 | 140.80 | 5517350.8 | 2 | 1 | 0 | 0.24 | 1684 | 9775  |
| >tr F1PM73 F1PM73_CANLF Palmitoyltransferase OS=Canis lupus familiaris OX=9615 GN=ZDHHC23 PE=3 SV=3                                                 | 0.19 | 0.19 | 36.60  | 5484916.3 | 1 | 1 | 0 | 3.98 | 427  | 22460 |
| >tr J9P822 J9P822_CANLF TPR_REGION domain-containing protein OS=Canis lupus familiaris OX=9615 GN=TTC16 PE=4 SV=2                                   | 0.58 | 0.58 | 83.60  | 5461242.9 | 1 | 1 | 0 | 1.73 | 866  | 2823  |
| >tr E2RCF4 E2RCF4_CANLF Replication factor C subunit 5 OS=Canis lupus familiaris OX=9615 GN=RFC5 PE=3 SV=1                                          | 0.40 | 0.40 | 17.20  | 5429132.6 | 1 | 1 | 0 | 5.60 | 339  | 16271 |
| >tr A0A5F4CU74 A0A5F4CU74_CANLF FYVE, RhoGEF and PH domain containing 6 OS=Canis lupus familiaris OX=9615 GN=FGD6 PE=4 SV=1                         | 0.10 | 0.05 | 74.00  | 5395228.4 | 1 | 1 | 1 | 1.67 | 1320 | 14282 |
| >tr A0A5F4DFC0 A0A5F4DFC0_CANLF Caseinolytic mitochondrial matrix peptidase chaperone subunit X OS=Canis lupus familiaris OX=9615 GN=CLPX PE=4 SV=1 | 0.10 | 0.02 | 7.20   | 5350398.5 | 1 | 1 | 1 | 2.58 | 776  | 5729  |
| >tr F1PYS8 F1PYS8_CANLF Olfactory receptor OS=Canis lupus familiaris OX=9615 GN=OR5P6 PE=3 SV=3                                                     | 0.16 | 0.16 | 13.50  | 5338911.3 | 1 | 1 | 1 | 6.69 | 314  | 20945 |
| >tr A0A5F4DKM7 A0A5F4DKM7_CANLF Terminal uridylyl transferase 4 OS=Canis lupus familiaris OX=9615 GN=TUT4 PE=4 SV=1                                 | 0.47 | 0.47 | 120.60 | 5294282.5 | 1 | 1 | 0 | 0.19 | 1611 | 941   |
| >tr F1PFZ5 F1PFZ5_CANLF Milk fat globule EGF and factor V/VIII domain containing OS=Canis lupus familiaris OX=9615 GN=MFGE8 PE=4 SV=3               | 1.48 | 1.48 | 191.60 | 5263001.6 | 1 | 1 | 0 | 1.87 | 428  | 7079  |
| >tr E2RN65 E2RN65_CANLF Phosphatidylinositol-glycan biosynthesis class W protein OS=Canis lupus familiaris OX=9615 GN=PIGW PE=3 SV=2                | 0.39 | 0.37 | 116.20 | 5261859.4 | 2 | 1 | 0 | 1.38 | 509  | 21598 |
| >tr J9NZH4 J9NZH4_CANLF NTR domain-containing protein OS=Canis lupus familiaris OX=9615 GN=LOC102154527 PE=3 SV=2                                   | 0.13 | 0.13 | 47.70  | 5248951.3 | 1 | 1 | 0 | 8.60 | 221  | 39505 |
| >tr A0A5F4CCY0 A0A5F4CCY0_CANLF Programmed cell death 11 OS=Canis lupus familiaris OX=9615 GN=PDCD11 PE=4 SV=1                                      | 0.94 | 0.95 | 217.30 | 5211573.7 | 1 | 1 | 0 | 0.22 | 1829 | 1406  |
| >sp Q8WN22 PRKDC_CANLF DNA-dependent protein kinase catalytic subunit OS=Canis lupus familiaris OX=9615 GN=PRKDC PE=2 SV=1                          | 0.16 | 0.16 | 127.20 | 5112820.5 | 1 | 1 | 0 | 0.10 | 4144 | 338   |
| >tr E2RSI6 E2RSI6_CANLF Ezrin OS=Canis lupus familiaris OX=9615 GN=EZR PE=4 SV=1                                                                    | 0.61 | 0.61 | 131.80 | 4896880.6 | 1 | 1 | 0 | 1.19 | 586  | 15650 |
| >tr A0A5F4CUE8 A0A5F4CUE8_CANLF Senataxin OS=Canis lupus familiaris OX=9615 GN=SETX PE=4 SV=1                                                       | 0.39 | 0.37 | 110.60 | 4835244.7 | 2 | 1 | 0 | 0.26 | 2645 | 1796  |
| >tr J9P3R7 J9P3R7_CANLF SCO-spondin OS=Canis lupus familiaris OX=9615 GN=SSPO PE=3 SV=2                                                             | 0.20 | 0.13 | 152.20 | 4819541.2 | 5 | 1 | 1 | 0.23 | 5112 | 24898 |
| >sp Q8WMX5 S15A1_CANLF Solute carrier family 15 member 1 OS=Canis lupus familiaris OX=9615 GN=SLC15A1 PE=2 SV=2                                     | 0.27 | 0.25 | 54.40  | 4818120.4 | 2 | 1 | 1 | 1.27 | 708  | 5     |

|                                                                                                                                           |      |      |        |           |   |   |   |      |      |       |
|-------------------------------------------------------------------------------------------------------------------------------------------|------|------|--------|-----------|---|---|---|------|------|-------|
| >tr E2R824 E2R824_CANLF Zinc finger protein 518B OS=Canis lupus familiaris OX=9615 GN=ZNF518B PE=4 SV=3                                   | 0.14 | 0.14 | 92.90  | 4810757.6 | 1 | 1 | 0 | 0.80 | 1000 | 24468 |
| >tr A0A5F4D4W8 A0A5F4D4W8_CANLF Dedicator of cytokinesis 1 OS=Canis lupus familiaris OX=9615 GN=DOCK1 PE=3 SV=1                           | 0.10 | 0.09 | 69.40  | 4734497.8 | 1 | 1 | 1 | 1.02 | 1855 | 11311 |
| >sp P49822 ALBU_CANLF Albumin OS=Canis lupus familiaris OX=9615 GN=ALB PE=1 SV=3                                                          | 0.10 | 0.09 | 60.00  | 4726404.3 | 1 | 1 | 1 | 2.14 | 608  | 490   |
| >tr J9P3J0 J9P3J0_CANLF R3H domain and coiled-coil containing 1 OS=Canis lupus familiaris OX=9615 GN=R3HCC1 PE=4 SV=1                     | 0.23 | 0.23 | 99.90  | 4705074.6 | 1 | 1 | 0 | 1.09 | 458  | 1410  |
| >tr A0A5F4CJ52 A0A5F4CJ52_CANLF Beta-galactosidase OS=Canis lupus familiaris OX=9615 GN=GLB1 PE=3 SV=1                                    | 0.23 | 0.23 | 99.90  | 4705074.6 | 1 | 1 | 0 | 0.53 | 946  | 3892  |
| >tr A0A5F4BSI9 A0A5F4BSI9_CANLF Centrosomal protein 350 OS=Canis lupus familiaris OX=9615 GN=CEP350 PE=4 SV=1                             | 0.10 | 0.04 | 158.90 | 4672931.6 | 1 | 1 | 0 | 0.32 | 3113 | 15196 |
| >tr F1PHA9 F1PHA9_CANLF Motile sperm domain containing 2 OS=Canis lupus familiaris OX=9615 GN=MOSPD2 PE=4 SV=3                            | 0.57 | 0.57 | 148.20 | 4672931.6 | 1 | 1 | 0 | 0.97 | 518  | 10201 |
| >tr A0A5F4DFU6 A0A5F4DFU6_CANLF Acetyl-CoA acyltransferase 1 OS=Canis lupus familiaris OX=9615 GN=ACAA1 PE=3 SV=1                         | 0.13 | 0.11 | 217.70 | 4646285.0 | 2 | 1 | 0 | 0.97 | 513  | 2936  |
| >tr A0A5F4C0S7 A0A5F4C0S7_CANLF HEAT repeat containing 5A OS=Canis lupus familiaris OX=9615 GN=HEATR5A PE=3 SV=1                          | 0.10 | 0.00 | 51.60  | 4620329.6 | 3 | 1 | 0 | 0.25 | 1995 | 1753  |
| >tr F1PZN6 F1PZN6_CANLF Olfactory receptor OS=Canis lupus familiaris OX=9615 PE=3 SV=3                                                    | 0.13 | 0.13 | 48.60  | 4598782.0 | 1 | 1 | 1 | 6.77 | 310  | 37737 |
| >tr A0A5F4C8H3 A0A5F4C8H3_CANLF Glycerol-3-phosphate acyltransferase 1, mitochondrial OS=Canis lupus familiaris OX=9615 GN=GPAM PE=3 SV=1 | 0.87 | 0.87 | 121.50 | 4596836.8 | 1 | 1 | 0 | 1.31 | 837  | 11048 |
| >tr A0A5F4CLI1 A0A5F4CLI1_CANLF Histone deacetylase 6 OS=Canis lupus familiaris OX=9615 GN=HDAC6 PE=4 SV=1                                | 0.63 | 0.63 | 250.70 | 4526077.8 | 1 | 1 | 0 | 0.43 | 1175 | 4057  |
| >tr F1P721 F1P721_CANLF Kinase suppressor of ras 2 OS=Canis lupus familiaris OX=9615 GN=KSR2 PE=4 SV=3                                    | 0.21 | 0.21 | 17.90  | 4523411.4 | 1 | 1 | 0 | 1.37 | 950  | 2276  |
| >tr F1PHA9 F1PHA9_CANLF Motile sperm domain containing 2 OS=Canis lupus familiaris OX=9615 GN=MOSPD2 PE=4 SV=3                            | 0.33 | 0.33 | 152.10 | 4470267.0 | 1 | 1 | 0 | 0.97 | 518  | 10201 |
| >tr A0A5F4BX19 A0A5F4BX19_CANLF Multidrug and toxin extrusion protein OS=Canis lupus familiaris OX=9615 GN=ALDH3A2 PE=3 SV=1              | 0.56 | 0.56 | 137.70 | 4451339.3 | 1 | 1 | 0 | 0.61 | 983  | 8236  |
| >tr F6XN72 F6XN72_CANLF Leucine rich repeat containing 71 OS=Canis lupus familiaris OX=9615 GN=LRRC71 PE=4 SV=1                           | 0.15 | 0.15 | 97.40  | 4431542.6 | 1 | 1 | 1 | 1.96 | 560  | 34087 |
| >tr A0A5F4CUE8 A0A5F4CUE8_CANLF Senataxin OS=Canis lupus familiaris OX=9615 GN=SETX PE=4 SV=1                                             | 0.23 | 0.21 | 120.30 | 4424101.7 | 2 | 1 | 0 | 0.26 | 2645 | 1796  |
| >tr A0A5F4CXV0 A0A5F4CXV0_CANLF Mahogunin ring finger 1 OS=Canis lupus familiaris OX=9615 GN=MGRN1 PE=4 SV=1                              | 0.31 | 0.31 | 84.00  | 4399504.7 | 1 | 1 | 0 | 2.19 | 549  | 4641  |
| >tr A0A5F4CJI0 A0A5F4CJI0_CANLF Folate_rec domain-containing protein OS=Canis lupus familiaris OX=9615 GN=FOLR1 PE=3 SV=1                 | 0.36 | 0.36 | 192.90 | 4394554.1 | 1 | 1 | 0 | 3.14 | 255  | 10075 |
| >sp P21842 CMA1_CANLF Chymase OS=Canis lupus familiaris OX=9615 GN=CMA1 PE=1 SV=1                                                         | 0.16 | 0.16 | 84.50  | 4287964.4 | 1 | 1 | 0 | 0.80 | 249  | 34    |
| >tr F1PWR1 F1PWR1_CANLF Insulin like growth factor 2 receptor OS=Canis lupus familiaris OX=9615 GN=IGF2R PE=4 SV=3                        | 0.10 | 0.03 | 105.30 | 4278844.4 | 1 | 1 | 1 | 0.85 | 2474 | 1073  |
| >tr E2R5W0 E2R5W0_CANLF Myosin binding protein C2 OS=Canis lupus familiaris OX=9615 GN=MYBPC2 PE=3 SV=2                                   | 1.15 | 1.15 | 88.50  | 4231783.1 | 1 | 1 | 0 | 4.15 | 265  | 19744 |

|                                                                                                                                              |      |      |        |           |   |   |   |       |      |       |
|----------------------------------------------------------------------------------------------------------------------------------------------|------|------|--------|-----------|---|---|---|-------|------|-------|
| >tr A0A5F4D9S5 A0A5F4D9S5_CANLF Hyaluronoglucosaminidase OS=Canis lupus familiaris OX=9615 GN=CEMIP PE=3 SV=1                                | 0.16 | 0.16 | 103.40 | 4195688.3 | 1 | 1 | 0 | 0.24  | 1684 | 9775  |
| >tr F1PQ45 F1PQ45_CANLF Integrin subunit alpha 11 OS=Canis lupus familiaris OX=9615 GN=ITGA11 PE=3 SV=3                                      | 0.12 | 0.12 | 68.80  | 4113875.1 | 1 | 1 | 1 | 1.52  | 1183 | 26268 |
| >sp E2RED8 AP4M1_CANLF AP-4 complex subunit mu-1 OS=Canis lupus familiaris OX=9615 GN=AP4M1 PE=3 SV=2                                        | 0.91 | 0.91 | 135.10 | 3990557.9 | 1 | 1 | 0 | 0.66  | 452  | 634   |
| >tr E2RHZ3 E2RHZ3_CANLF DEAH-box helicase 37 OS=Canis lupus familiaris OX=9615 GN=DHX37 PE=4 SV=1                                            | 0.40 | 0.40 | 90.40  | 3802195.2 | 1 | 1 | 1 | 0.52  | 1149 | 44834 |
| >tr A0A5F4CJI0 A0A5F4CJI0_CANLF Folate_rec domain-containing protein OS=Canis lupus familiaris OX=9615 GN=FOLR1 PE=3 SV=1                    | 1.25 | 1.25 | 197.40 | 3770823.4 | 1 | 1 | 0 | 3.14  | 255  | 10075 |
| >sp Q9XS65 PTGDS_CANLF Prostaglandin-H2 D-isomerase OS=Canis lupus familiaris OX=9615 GN=PTGDS PE=2 SV=1                                     | 1.04 | 0.72 | 234.20 | 3595633.3 | 7 | 2 | 1 | 10.47 | 191  | 165   |
| >tr E2RN65 E2RN65_CANLF Phosphatidylinositol-glycan biosynthesis class W protein OS=Canis lupus familiaris OX=9615 GN=PIGW PE=3 SV=2         | 0.62 | 0.62 | 121.00 | 3567338.7 | 1 | 1 | 0 | 1.38  | 509  | 21598 |
| >tr A0A5F4DFX0 A0A5F4DFX0_CANLF Exportin-T OS=Canis lupus familiaris OX=9615 GN=XPOT PE=3 SV=1                                               | 0.10 | 0.01 | 115.10 | 3423369.5 | 2 | 1 | 0 | 0.75  | 938  | 2329  |
| >sp Q697L1 TRPV1_CANLF Transient receptor potential cation channel subfamily V member 1 OS=Canis lupus familiaris OX=9615 GN=TRPV1 PE=2 SV=1 | 0.33 | 0.31 | 73.20  | 3403778.4 | 2 | 1 | 1 | 0.36  | 840  | 297   |
| >sp F1PRN2 MYO1D_CANLF Unconventional myosin-Id OS=Canis lupus familiaris OX=9615 GN=MYO1D PE=1 SV=2                                         | 0.65 | 0.65 | 112.00 | 3386784.9 | 1 | 1 | 0 | 0.30  | 1006 | 763   |
| >sp P23685 NAC1_CANLF Sodium/calcium exchanger 1 OS=Canis lupus familiaris OX=9615 GN=SLC8A1 PE=1 SV=1                                       | 0.10 | 0.05 | 98.60  | 3254155.3 | 1 | 1 | 0 | 1.03  | 970  | 764   |
| >sp F1PRN2 MYO1D_CANLF Unconventional myosin-Id OS=Canis lupus familiaris OX=9615 GN=MYO1D PE=1 SV=2                                         | 0.41 | 0.41 | 113.90 | 3245197.0 | 1 | 1 | 0 | 0.30  | 1006 | 763   |
| >tr A0A5F4CPU3 A0A5F4CPU3_CANLF SEC24 homolog D, COPII coat complex component OS=Canis lupus familiaris OX=9615 GN=SEC24D PE=3 SV=1          | 0.10 | 0.00 | 21.20  | 3207395.2 | 2 | 1 | 0 | 0.53  | 946  | 2125  |
| >sp B8K1W2 ABCB8_CANLF Bile salt export pump OS=Canis lupus familiaris OX=9615 GN=Abcb11e PE=1 SV=1                                          | 0.87 | 0.87 | 216.70 | 3092899.8 | 1 | 1 | 0 | 0.30  | 1325 | 527   |
| >tr A0A5F4CQP5 A0A5F4CQP5_CANLF Coiled-coil and C2 domain containing 2A OS=Canis lupus familiaris OX=9615 GN=CC2D2A PE=4 SV=1                | 0.33 | 0.33 | 43.60  | 3043436.9 | 1 | 1 | 1 | 0.43  | 1638 | 11842 |
| >tr J9P432 J9P432_CANLF Glutamine--fructose-6-phosphate transaminase (isomerizing) OS=Canis lupus familiaris OX=9615 GN=GFPT1 PE=4 SV=2      | 1.06 | 1.06 | 74.60  | 3036486.9 | 1 | 1 | 0 | 1.18  | 677  | 7191  |
| >tr E2RIV7 E2RIV7_CANLF Syntrophin alpha 1 OS=Canis lupus familiaris OX=9615 GN=SNTA1 PE=3 SV=3                                              | 0.10 | 0.00 | 33.90  | 2913593.7 | 2 | 1 | 1 | 1.03  | 486  | 34454 |
| >tr A0A5F4D9S5 A0A5F4D9S5_CANLF Hyaluronoglucosaminidase OS=Canis lupus familiaris OX=9615 GN=CEMIP PE=3 SV=1                                | 0.38 | 0.39 | 142.90 | 2908687.7 | 1 | 1 | 0 | 0.24  | 1684 | 9775  |
| >tr A0A5F4BZ61 A0A5F4BZ61_CANLF G_PROTEIN_RECEP_F1_2 domain-containing protein OS=Canis lupus familiaris OX=9615 GN=OR5D13 PE=4 SV=1         | 0.57 | 0.57 | 54.20  | 2896904.8 | 1 | 1 | 0 | 1.70  | 294  | 37537 |
| >tr E2R868 E2R868_CANLF [histone H4]-N-methyl-L-lysine20 N-methyltransferase KMT5B OS=Canis lupus familiaris OX=9615 GN=KMT5B PE=4 SV=3      | 0.10 | 0.00 | 42.50  | 2848313.2 | 2 | 1 | 0 | 0.56  | 885  | 7704  |
| >sp O18840 ACTB_CANLF Actin, cytoplasmic 1 OS=Canis lupus familiaris OX=9615 GN=ACTB PE=2 SV=3                                               | 0.98 | 0.94 | 302.60 | 2782134.0 | 3 | 1 | 0 | 2.93  | 375  | 642   |
| >sp E2RED8 AP4M1_CANLF AP-4 complex subunit mu-1 OS=Canis lupus familiaris OX=9615 GN=AP4M1 PE=3 SV=2                                        | 1.18 | 1.18 | 148.60 | 2687637.1 | 1 | 1 | 0 | 0.66  | 452  | 634   |

|                                                                                                                                           |      |      |        |           |    |   |   |       |      |       |
|-------------------------------------------------------------------------------------------------------------------------------------------|------|------|--------|-----------|----|---|---|-------|------|-------|
| >tr F6XBJ5 F6XBJ5_CANLF Integrator complex subunit 1 OS=Canis lupus familiaris OX=9615 GN=INTS1 PE=4 SV=1                                 | 0.68 | 0.66 | 75.30  | 2672468.8 | 2  | 1 | 0 | 0.73  | 2188 | 9613  |
| >tr F1PKS8 F1PKS8_CANLF Anoctamin OS=Canis lupus familiaris OX=9615 GN=VWF PE=3 SV=3                                                      | 0.12 | 0.02 | 133.60 | 2612261.7 | 6  | 1 | 1 | 1.61  | 992  | 42310 |
| >tr E2RS58 E2RS58_CANLF Solute carrier family 35 member B1 OS=Canis lupus familiaris OX=9615 GN=SLC35B1 PE=3 SV=2                         | 0.10 | 0.05 | 64.70  | 2610967.5 | 1  | 1 | 1 | 0.83  | 360  | 7421  |
| >tr A0A5F4CEY4 A0A5F4CEY4_CANLF ELL associated factor 2 OS=Canis lupus familiaris OX=9615 GN=EAF2 PE=3 SV=1                               | 0.11 | 0.09 | 8.40   | 2527130.3 | 2  | 1 | 0 | 0.74  | 543  | 6686  |
| >tr A0A5F4BY19 A0A5F4BY19_CANLF RELT like 1 OS=Canis lupus familiaris OX=9615 GN=RELL1 PE=3 SV=1                                          | 0.20 | 0.18 | 158.50 | 2270381.7 | 2  | 1 | 1 | 4.65  | 258  | 11917 |
| >sp Q9XS65 PTGDS_CANLF Prostaglandin-H2 D-isomerase OS=Canis lupus familiaris OX=9615 GN=PTGDS PE=2 SV=1                                  | 1.62 | 1.44 | 252.20 | 2203885.9 | 11 | 2 | 1 | 10.47 | 191  | 165   |
| >tr A0A5F4CTR9 A0A5F4CTR9_CANLF Semaphorin 3A OS=Canis lupus familiaris OX=9615 GN=SEMA3A PE=3 SV=1                                       | 0.22 | 0.22 | 5.90   | 1961165.6 | 1  | 1 | 0 | 0.68  | 732  | 2791  |
| >tr F1PJ45 F1PJ45_CANLF Adhesion G protein-coupled receptor L3 OS=Canis lupus familiaris OX=9615 GN=ADGRL3 PE=4 SV=2                      | 0.22 | 0.22 | 5.90   | 1961165.6 | 1  | 1 | 0 | 0.33  | 1528 | 2066  |
| >tr F1PPQ1 F1PPQ1_CANLF Schlafen like 1 OS=Canis lupus familiaris OX=9615 GN=SLFNL1 PE=4 SV=3                                             | 0.10 | 0.01 | 67.40  | 1816832.0 | 1  | 1 | 0 | 2.31  | 347  | 24972 |
| >sp Q30DN6 KDM5D_CANLF Lysine-specific demethylase 5D OS=Canis lupus familiaris OX=9615 GN=KDM5D PE=2 SV=1                                | 0.35 | 0.35 | 93.40  | 1805107.1 | 1  | 1 | 0 | 0.13  | 1545 | 213   |
| >tr A0A5F4DIL6 A0A5F4DIL6_CANLF Dpy-19 like C-mannosyltransferase 3 OS=Canis lupus familiaris OX=9615 GN=DPY19L3 PE=3 SV=1                | 0.30 | 0.28 | 117.00 | 1796079.9 | 2  | 1 | 1 | 1.75  | 742  | 42539 |
| >tr A0A5F4D3R3 A0A5F4D3R3_CANLF Mitogen-activated protein kinase kinase 4 OS=Canis lupus familiaris OX=9615 GN=MAP3K4 PE=4 SV=1           | 0.29 | 0.29 | 79.30  | 1732983.2 | 1  | 1 | 0 | 0.55  | 1630 | 2223  |
| >tr F1PPP9 F1PPP9_CANLF Family with sequence similarity 135 member A OS=Canis lupus familiaris OX=9615 GN=FAM135A PE=3 SV=3               | 0.20 | 0.18 | 105.20 | 1727197.3 | 2  | 1 | 0 | 1.22  | 1399 | 6815  |
| >tr E2RQX2 E2RQX2_CANLF Ubiquitin specific peptidase 53 OS=Canis lupus familiaris OX=9615 GN=USP53 PE=4 SV=2                              | 0.65 | 0.65 | 43.50  | 1688846.7 | 1  | 1 | 1 | 1.35  | 1112 | 11373 |
| >tr A0A5F4D6Q9 A0A5F4D6Q9_CANLF Sialic acid binding Ig like lectin 1 OS=Canis lupus familiaris OX=9615 GN=SIGLEC1 PE=4 SV=1               | 0.38 | 0.38 | 76.90  | 1673862.5 | 1  | 1 | 1 | 0.99  | 1719 | 15622 |
| >tr F1PPP9 F1PPP9_CANLF Family with sequence similarity 135 member A OS=Canis lupus familiaris OX=9615 GN=FAM135A PE=3 SV=3               | 0.14 | 0.14 | 93.40  | 1627559.1 | 1  | 1 | 0 | 1.22  | 1399 | 6815  |
| >tr F1PC83 F1PC83_CANLF ADAM metallopeptidase with thrombospondin type 1 motif 18 OS=Canis lupus familiaris OX=9615 GN=ADAMTS18 PE=4 SV=3 | 0.24 | 0.24 | 110.70 | 1624420.2 | 1  | 1 | 1 | 0.34  | 1191 | 4997  |
| >tr E2RTH4 E2RTH4_CANLF Dendrin OS=Canis lupus familiaris OX=9615 GN=DDN PE=4 SV=2                                                        | 0.65 | 0.65 | 133.70 | 1515276.4 | 1  | 1 | 1 | 2.84  | 704  | 20318 |
| >tr F1PEJ3 F1PEJ3_CANLF WD_REPEATS_REGION domain-containing protein OS=Canis lupus familiaris OX=9615 GN=WDR97 PE=4 SV=3                  | 0.14 | 0.14 | 26.20  | 1446384.1 | 1  | 1 | 0 | 0.34  | 1467 | 13780 |
| >sp A2IBY8 MIP_CANLF Lens fiber major intrinsic protein OS=Canis lupus familiaris OX=9615 GN=MIP PE=2 SV=1                                | 0.10 | 0.00 | 34.40  | 1437915.6 | 1  | 1 | 0 | 1.90  | 263  | 112   |
| >tr F1PI09 F1PI09_CANLF Aldehyde oxidase OS=Canis lupus familiaris OX=9615 GN=AOX2 PE=3 SV=3                                              | 0.37 | 0.36 | 180.30 | 1428729.9 | 2  | 1 | 0 | 0.67  | 1347 | 21650 |
| >sp Q9XS65 PTGDS_CANLF Prostaglandin-H2 D-isomerase OS=Canis lupus familiaris OX=9615 GN=PTGDS PE=2 SV=1                                  | 0.49 | 0.41 | 222.20 | 1260896.8 | 5  | 1 | 1 | 7.33  | 191  | 165   |

|                                                                                                                                       |      |      |        |           |   |   |   |       |      |       |
|---------------------------------------------------------------------------------------------------------------------------------------|------|------|--------|-----------|---|---|---|-------|------|-------|
| >sp Q28895 NPC2_CANLF NPC intracellular cholesterol transporter 2 OS=Canis lupus familiaris OX=9615 GN=NPC2 PE=2 SV=1                 | 0.96 | 0.65 | 128.50 | 1220988.5 | 3 | 2 | 0 | 14.77 | 149  | 153   |
| >sp O46607 GPX5_CANLF Epididymal secretory glutathione peroxidase OS=Canis lupus familiaris OX=9615 GN=GPX5 PE=2 SV=1                 | 3.59 | 1.94 | 157.90 | 1119106.1 | 8 | 3 | 0 | 11.76 | 221  | 564   |
| >sp Q28895 NPC2_CANLF NPC intracellular cholesterol transporter 2 OS=Canis lupus familiaris OX=9615 GN=NPC2 PE=2 SV=1                 | 1.37 | 1.05 | 146.20 | 1099642.5 | 2 | 2 | 0 | 14.77 | 149  | 153   |
| >tr F1PJP1 F1PJP1_CANLF Dynein axonemal heavy chain 11 OS=Canis lupus familiaris OX=9615 GN=DNAH11 PE=3 SV=3                          | 0.65 | 0.65 | 62.90  | 1056658.7 | 1 | 1 | 0 | 0.35  | 4519 | 42705 |
| >tr F1PHN5 F1PHN5_CANLF G protein-coupled receptor class C group 5 member A OS=Canis lupus familiaris OX=9615 GN=GPRC5A PE=4 SV=2     | 0.90 | 0.90 | 12.20  | 1034092.2 | 1 | 1 | 0 | 3.64  | 357  | 3905  |
| >tr J9NSS6 J9NSS6_CANLF DNA helicase OS=Canis lupus familiaris OX=9615 GN=CHD2 PE=4 SV=2                                              | 0.14 | 0.10 | 57.50  | 1031603.0 | 3 | 1 | 0 | 0.28  | 1780 | 1264  |
| >tr J9P0B4 J9P0B4_CANLF Tudor domain containing 15 OS=Canis lupus familiaris OX=9615 GN=TDRD15 PE=4 SV=2                              | 0.67 | 0.65 | 153.10 | 1026905.3 | 2 | 1 | 0 | 0.57  | 2105 | 4188  |
| >sp P23685 NAC1_CANLF Sodium/calcium exchanger 1 OS=Canis lupus familiaris OX=9615 GN=SLC8A1 PE=1 SV=1                                | 0.37 | 0.37 | 153.60 | 982205.0  | 1 | 1 | 0 | 1.03  | 970  | 764   |
| >sp Q9GL25 ESPB1_CANLF Epididymal sperm-binding protein 1 OS=Canis lupus familiaris OX=9615 GN=ELSPBP1 PE=1 SV=1                      | 1.64 | 1.60 | 214.70 | 944907.5  | 3 | 1 | 0 | 4.49  | 245  | 36    |
| >tr F1PJY1 F1PJY1_CANLF Mannosyl-glycoprotein endo-beta-N-acetylglucosaminidase OS=Canis lupus familiaris OX=9615 GN=ENGASE PE=3 SV=3 | 0.30 | 0.30 | 129.10 | 909314.2  | 1 | 1 | 1 | 1.74  | 690  | 32761 |
| >sp Q2Q421 AGRE2_CANLF Adhesion G protein-coupled receptor E2 OS=Canis lupus familiaris OX=9615 GN=ADGRE2 PE=2 SV=2                   | 0.67 | 0.67 | 12.90  | 896724.6  | 1 | 1 | 0 | 0.48  | 830  | 472   |
| >tr F6UNY1 F6UNY1_CANLF Neuropilin OS=Canis lupus familiaris OX=9615 GN=NRP1 PE=3 SV=2                                                | 0.67 | 0.67 | 12.90  | 896724.6  | 1 | 1 | 0 | 0.45  | 890  | 1315  |
| >tr A0A5F4D844 A0A5F4D844_CANLF Adhesion G protein-coupled receptor E5 OS=Canis lupus familiaris OX=9615 GN=ADGRE5 PE=4 SV=1          | 0.18 | 0.12 | 19.40  | 876804.0  | 4 | 1 | 0 | 0.48  | 836  | 1078  |
| >tr A0A5F4DB52 A0A5F4DB52_CANLF Neuropilin OS=Canis lupus familiaris OX=9615 GN=NRP1 PE=3 SV=1                                        | 0.18 | 0.12 | 19.40  | 876804.0  | 4 | 1 | 0 | 0.47  | 856  | 4302  |
| >sp Q6AW47 EST5A_CANLF Carboxylesterase 5A OS=Canis lupus familiaris OX=9615 GN=CES5A PE=2 SV=1                                       | 0.85 | 0.79 | 188.90 | 825726.6  | 4 | 1 | 0 | 1.22  | 575  | 629   |
| >tr A0A5F4CCD0 A0A5F4CCD0_CANLF Cysteine rich secretory protein 2 OS=Canis lupus familiaris OX=9615 GN=CRISP2 PE=3 SV=1               | 1.67 | 1.67 | 175.00 | 703679.8  | 1 | 1 | 0 | 4.82  | 311  | 11017 |
| >tr E2R9Z9 E2R9Z9_CANLF Leucine rich repeat containing 8 VRAC subunit C OS=Canis lupus familiaris OX=9615 GN=LRR8C8 PE=3 SV=1         | 0.12 | 0.12 | 65.70  | 651475.4  | 1 | 1 | 0 | 0.62  | 803  | 9247  |
| >sp Q9GL25 ESPB1_CANLF Epididymal sperm-binding protein 1 OS=Canis lupus familiaris OX=9615 GN=ELSPBP1 PE=1 SV=1                      | 1.06 | 1.02 | 238.00 | 613431.8  | 3 | 1 | 0 | 4.49  | 245  | 36    |
| >tr A0A5F4CPU3 A0A5F4CPU3_CANLF SEC24 homolog D, COPII coat complex component OS=Canis lupus familiaris OX=9615 GN=SEC24D PE=3 SV=1   | 0.58 | 0.58 | 7.90   | 555937.6  | 1 | 1 | 0 | 0.53  | 946  | 2125  |
| >tr A0A5F4C0S7 A0A5F4C0S7_CANLF HEAT repeat containing 5A OS=Canis lupus familiaris OX=9615 GN=HEATR5A PE=3 SV=1                      | 0.58 | 0.58 | 7.90   | 555937.6  | 1 | 1 | 0 | 0.25  | 1995 | 1753  |
| >tr A0A5F4C5M9 A0A5F4C5M9_CANLF Contactin associated protein 1 OS=Canis lupus familiaris OX=9615 GN=CNTNAP1 PE=3 SV=1                 | 0.81 | 0.60 | 154.40 | 544591.4  | 4 | 2 | 0 | 0.65  | 1388 | 10827 |
| >tr J9NYC7 J9NYC7_CANLF Dynein axonemal heavy chain 12 OS=Canis lupus familiaris OX=9615 GN=DNAH12 PE=3 SV=1                          | 0.35 | 0.32 | 134.30 | 503314.2  | 3 | 1 | 0 | 0.33  | 3960 | 15992 |

|                                                                                                                                |      |      |        |          |   |   |   |      |      |       |
|--------------------------------------------------------------------------------------------------------------------------------|------|------|--------|----------|---|---|---|------|------|-------|
| >tr F1PCZ0 F1PCZ0_CANLF Septin OS=Canis lupus familiaris OX=9615 GN=SEPTIN5 PE=3 SV=2                                          | 0.65 | 0.65 | 38.00  | 486065.2 | 1 | 1 | 0 | 4.23 | 378  | 3212  |
| >tr Q9XSV4 Q9XSV4_CANLF CE10 protein OS=Canis lupus familiaris OX=9615 GN=ce10 PE=2 SV=1                                       | 1.95 | 1.93 | 149.90 | 439663.0 | 3 | 2 | 0 | 9.09 | 110  | 41542 |
| >sp P79149 PININ_CANLF Pinin OS=Canis lupus familiaris OX=9615 GN=PNN PE=2 SV=3                                                | 0.37 | 0.37 | 64.10  | 428019.6 | 1 | 1 | 0 | 0.65 | 773  | 156   |
| >sp E2QRY6 NNRE_CANLF NAD(P)H-hydrate epimerase OS=Canis lupus familiaris OX=9615 GN=NAXE PE=3 SV=1                            | 0.19 | 0.17 | 109.00 | 357197.7 | 2 | 1 | 0 | 1.74 | 288  | 159   |
| >tr A0A5F4BSK0 A0A5F4BSK0_CANLF RUN and SH3 domain containing 2 OS=Canis lupus familiaris OX=9615 GN=RUSC2 PE=4 SV=1           | 0.54 | 0.54 | 47.70  | 291337.0 | 1 | 1 | 0 | 0.28 | 1450 | 24598 |
| >tr A0A5F4C5M9 A0A5F4C5M9_CANLF Contactin associated protein 1 OS=Canis lupus familiaris OX=9615 GN=CNTNAP1 PE=3 SV=1          | 0.31 | 0.31 | 44.00  | 288154.4 | 1 | 1 | 0 | 0.36 | 1388 | 10827 |
| >tr A0A5F4CIJ4 A0A5F4CIJ4_CANLF Transmembrane protein 63A OS=Canis lupus familiaris OX=9615 GN=TMEM63A PE=3 SV=1               | 0.40 | 0.40 | 115.40 | 264293.0 | 1 | 1 | 0 | 0.76 | 789  | 13092 |
| >tr J9P821 J9P821_CANLF A-kinase anchoring protein 3 OS=Canis lupus familiaris OX=9615 GN=AKAP3 PE=3 SV=2                      | 0.65 | 0.65 | 18.30  | 241661.7 | 1 | 1 | 0 | 2.03 | 787  | 7082  |
| >tr A0A5F4DHH0 A0A5F4DHH0_CANLF ATP binding cassette subfamily A member 1 OS=Canis lupus familiaris OX=9615 GN=ABCA1 PE=4 SV=1 | 0.38 | 0.38 | 10.10  | 241479.4 | 1 | 1 | 1 | 0.51 | 2175 | 3709  |
| >tr E2RP25 E2RP25_CANLF Tyrosine-protein kinase OS=Canis lupus familiaris OX=9615 GN=ITK PE=3 SV=2                             | 0.24 | 0.24 | 7.90   | 238020.7 | 1 | 1 | 0 | 0.97 | 620  | 41809 |
| >tr E2RG75 E2RG75_CANLF Inactive ribonuclease-like protein 9 OS=Canis lupus familiaris OX=9615 GN=RNASE9 PE=3 SV=2             | 0.79 | 0.79 | 238.60 | 169807.0 | 1 | 1 | 0 | 4.55 | 198  | 41734 |
| >tr E2QX33 E2QX33_CANLF Coiled-coil and C2 domain containing 1A OS=Canis lupus familiaris OX=9615 GN=CC2D1A PE=3 SV=1          | 0.14 | 0.14 | 19.40  | 161331.3 | 1 | 1 | 0 | 0.53 | 951  | 10961 |
| >tr E2R4U2 E2R4U2_CANLF Proline rich 35 OS=Canis lupus familiaris OX=9615 GN=PRR35 PE=4 SV=2                                   | 0.29 | 0.30 | 93.90  | 158230.7 | 1 | 1 | 0 | 1.49 | 536  | 44008 |
| >sp Q28895 NPC2_CANLF NPC intracellular cholesterol transporter 2 OS=Canis lupus familiaris OX=9615 GN=NPC2 PE=2 SV=1          | 1.35 | 1.35 | 162.30 | 152904.1 | 1 | 1 | 0 | 6.04 | 149  | 153   |
| >tr F6UP22 F6UP22_CANLF Metallophosphoesterase domain containing 1 OS=Canis lupus familiaris OX=9615 GN=MPPED1 PE=4 SV=1       | 0.20 | 0.20 | 15.60  | 141792.6 | 1 | 1 | 0 | 3.34 | 359  | 4733  |
| >tr E2R179 E2R179_CANLF Coiled-coil domain containing 30 OS=Canis lupus familiaris OX=9615 GN=CCDC30 PE=4 SV=3                 | 0.29 | 0.29 | 23.60  | 141016.9 | 1 | 1 | 0 | 1.41 | 709  | 15846 |
| >tr A0A5F4DDH9 A0A5F4DDH9_CANLF Saccharopine dehydrogenase (putative) OS=Canis lupus familiaris OX=9615 GN=SCCPDH PE=4 SV=1    | 0.27 | 0.27 | 61.70  | 102848.6 | 1 | 1 | 0 | 3.09 | 421  | 6763  |
