# Supplementary material for: Age-Dependent Variations in Functional Quality and Proteomic Characteristics of Canine (Canis lupus familiaris) Epididymal Spermatozoa
Source: MDPI journal article supplement (doi:10.3390/ijms23169143), 2022-08-15
Supplement: s1 [file s1]

**Table S1** Supplementary. Proteins of Group 1 (12 to 41 months old) dog (*Canis lupus familiaris*) epididymal spermatozoa evaluated by mass spectrometry (NanoUPLC-Q-TOF/MS).

| Description                                                                                                                    | Log Prob | Best  Log Prob | Best score | Total Intensity | # of spectra | # of unique peptides | # of mod peptides | Coverage % | # AA's in protein | Protein DB number |
|--------------------------------------------------------------------------------------------------------------------------------|----------|----------------|------------|-----------------|--------------|----------------------|-------------------|------------|-------------------|-------------------|
| >tr F1PR54 F1PR54_CANLF Lactotransferrin OS=Canis lupus familiaris OX=9615 GN=LTF PE=3 SV=1                                    | 19.74    | 4.25           | 327.40     | 1267254089.0    | 84           | 13                   | 1                 | 18.22      | 708               | 40436             |
| >tr F1PR54 F1PR54_CANLF Lactotransferrin OS=Canis lupus familiaris OX=9615 GN=LTF PE=3 SV=1                                    | 18.94    | 3.80           | 339.40     | 1215051051.0    | 72           | 11                   | 1                 | 16.67      | 708               | 40436             |
| >tr F1P920 F1P920_CANLF Apoptosis resistant E3 ubiquitin protein ligase 1 OS=Canis lupus familiaris OX=9615 GN=AREL1 PE=4 SV=3 | 0.10     | 0.00           | 71.90      | 1167711957.3    | 15           | 1                    | 0                 | 0.88       | 793               | 14252             |
| >tr A0A5F4BVF3 A0A5F4BVF3_CANLF Lactotransferrin OS=Canis lupus familiaris OX=9615 GN=LTF PE=3 SV=1                            | 6.26     | 2.91           | 378.90     | 949659431.2     | 67           | 9                    | 0                 | 15.97      | 626               | 32850             |
| >tr A0A5F4BVF3 A0A5F4BVF3_CANLF Lactotransferrin OS=Canis lupus familiaris OX=9615 GN=LTF PE=3 SV=1                            | 11.06    | 3.33           | 380.50     | 806283865.7     | 76           | 14                   | 1                 | 21.09      | 626               | 32850             |
| >sp Q28895 NPC2_CANLF NPC intracellular cholesterol transporter 2 OS=Canis lupus familiaris OX=9615 GN=NPC2 PE=2 SV=1          | 18.28    | 5.26           | 587.30     | 788208902.3     | 68           | 4                    | 0                 | 36.91      | 149               | 153               |
| >tr F1P920 F1P920_CANLF Apoptosis resistant E3 ubiquitin protein ligase 1 OS=Canis lupus familiaris OX=9615 GN=AREL1 PE=4 SV=3 | 0.23     | 0.03           | 59.60      | 785239591.8     | 11           | 1                    | 0                 | 0.88       | 793               | 14252             |
| >tr F1PMI1 F1PMI1_CANLF Sidekick cell adhesion molecule 2 OS=Canis lupus familiaris OX=9615 GN=SDK2 PE=4 SV=3                  | 0.18     | 0.02           | 21.40      | 670721164.1     | 9            | 1                    | 0                 | 0.28       | 2120              | 44885             |
| >tr A0A5F4DD58 A0A5F4DD58_CANLF Phosphoinositide phospholipase C OS=Canis lupus familiaris OX=9615 GN=PLCD3 PE=4 SV=1          | 0.24     | 0.02           | 146.60     | 656412058.5     | 83           | 4                    | 1                 | 1.48       | 741               | 3088              |
| >tr F2Z4Q6 F2Z4Q6_CANLF Alpha fetoprotein OS=Canis lupus familiaris OX=9615 GN=AFP PE=4 SV=2                                   | 20.91    | 4.01           | 308.90     | 651306681.1     | 130          | 17                   | 2                 | 33.28      | 637               | 24990             |
| >tr A0A5F4BVF3 A0A5F4BVF3_CANLF Lactotransferrin OS=Canis lupus familiaris OX=9615 GN=LTF PE=3 SV=1                            | 12.50    | 3.24           | 332.00     | 628759365.5     | 76           | 10                   | 0                 | 11.50      | 626               | 32850             |
| >sp P49822 ALBU_CANLF Albumin OS=Canis lupus familiaris OX=9615 GN=ALB PE=1 SV=3                                               | 10.77    | 4.02           | 295.20     | 624251171.4     | 36           | 7                    | 0                 | 14.80      | 608               | 490               |
| >tr F1PR54 F1PR54_CANLF Lactotransferrin OS=Canis lupus familiaris OX=9615 GN=LTF PE=3 SV=1                                    | 21.93    | 4.03           | 351.30     | 622958392.6     | 69           | 11                   | 0                 | 14.41      | 708               | 40436             |
| >tr J9P6V7 J9P6V7_CANLF HTH CENPB-type domain-containing protein OS=Canis lupus familiaris OX=9615 GN=LOC102153482 PE=3 SV=2   | 0.67     | 0.53           | 28.10      | 620016126.3     | 8            | 1                    | 0                 | 0.85       | 702               | 13682             |
| >tr E2RCT1 E2RCT1_CANLF WAP domain-containing protein OS=Canis lupus familiaris OX=9615 PE=4 SV=2                              | 6.73     | 3.20           | 315.30     | 602951558.5     | 30           | 2                    | 0                 | 9.48       | 116               | 21717             |
| >tr E2RCT1 E2RCT1_CANLF WAP domain-containing protein OS=Canis lupus familiaris OX=9615 PE=4 SV=2                              | 5.40     | 2.72           | 289.30     | 557446362.7     | 36           | 2                    | 0                 | 9.48       | 116               | 21717             |
| >sp P49822 ALBU_CANLF Albumin OS=Canis lupus familiaris OX=9615 GN=ALB PE=1 SV=3                                               | 10.39    | 3.28           | 337.00     | 543988868.7     | 25           | 7                    | 0                 | 12.99      | 608               | 490               |
| >tr E2QRT5 E2QRT5_CANLF Structural maintenance of chromosomes protein OS=Canis lupus familiaris OX=9615 GN=SMC1B PE=3 SV=1     | 0.86     | 0.44           | 64.40      | 496319666.9     | 22           | 1                    | 0                 | 0.49       | 1235              | 2380              |
| >sp Q9XS65 PTGDS_CANLF Prostaglandin-H2 D-isomerase OS=Canis lupus familiaris OX=9615 GN=PTGDS PE=2 SV=1                       | 7.98     | 2.36           | 377.40     | 474370331.8     | 47           | 5                    | 1                 | 14.14      | 191               | 165               |
| >sp E2RKA8 RL32_CANLF 60S ribosomal protein L32 OS=Canis lupus familiaris OX=9615 GN=RPL32 PE=1 SV=1                           | 1.24     | 0.02           | 111.40     | 460727872.2     | 89           | 2                    | 0                 | 4.44       | 135               | 275               |

|                                                                                                                                         |       |      |        |             |    |    |   |       |      |       |
|-----------------------------------------------------------------------------------------------------------------------------------------|-------|------|--------|-------------|----|----|---|-------|------|-------|
| >tr F1PR54 F1PR54_CANLF Lactotransferrin OS=Canis lupus familiaris OX=9615 GN=LTF PE=3 SV=1                                             | 17.10 | 3.60 | 337.30 | 435790428.3 | 70 | 11 | 0 | 14.41 | 708  | 40436 |
| >tr Q9XSV4 Q9XSV4_CANLF CE10 protein OS=Canis lupus familiaris OX=9615 GN=ce10 PE=2 SV=1                                                | 5.15  | 3.99 | 327.80 | 408366088.7 | 35 | 3  | 0 | 12.73 | 110  | 41542 |
| >sp P62286 ASPM_CANLF Abnormal spindle-like microcephaly-associated protein homolog OS=Canis lupus familiaris OX=9615 GN=ASPM PE=2 SV=2 | 0.60  | 0.49 | 150.80 | 394855697.9 | 87 | 3  | 0 | 0.23  | 3469 | 677   |
| >tr Q9XSV4 Q9XSV4_CANLF CE10 protein OS=Canis lupus familiaris OX=9615 GN=ce10 PE=2 SV=1                                                | 3.23  | 2.66 | 238.70 | 383807575.7 | 28 | 3  | 0 | 12.73 | 110  | 41542 |
| >tr A0A5F4CUD4 A0A5F4CUD4_CANLF Transcription initiation factor TFIID subunit OS=Canis lupus familiaris OX=9615 GN=TAF1 PE=3 SV=1       | 0.61  | 0.12 | 101.20 | 379105437.2 | 33 | 2  | 0 | 0.53  | 1897 | 4265  |
| >sp Q28895 NPC2_CANLF NPC intracellular cholesterol transporter 2 OS=Canis lupus familiaris OX=9615 GN=NPC2 PE=2 SV=1                   | 4.98  | 4.24 | 362.30 | 373918670.2 | 28 | 2  | 0 | 12.75 | 149  | 153   |
| >sp Q9XS65 PTGDS_CANLF Prostaglandin-H2 D-isomerase OS=Canis lupus familiaris OX=9615 GN=PTGDS PE=2 SV=1                                | 3.45  | 1.81 | 308.70 | 368463965.4 | 17 | 2  | 1 | 10.47 | 191  | 165   |
| >sp E2RKA8 RL32_CANLF 60S ribosomal protein L32 OS=Canis lupus familiaris OX=9615 GN=RPL32 PE=1 SV=1                                    | 1.38  | 0.04 | 94.00  | 358661369.7 | 68 | 2  | 0 | 4.44  | 135  | 275   |
| >sp E2RKA8 RL32_CANLF 60S ribosomal protein L32 OS=Canis lupus familiaris OX=9615 GN=RPL32 PE=1 SV=1                                    | 1.90  | 0.15 | 167.30 | 351563558.8 | 87 | 2  | 0 | 4.44  | 135  | 275   |
| >tr A0A5F4D6L9 A0A5F4D6L9_CANLF Sacsin molecular chaperone OS=Canis lupus familiaris OX=9615 GN=SACS PE=4 SV=1                          | 0.10  | 0.01 | 75.30  | 331955034.6 | 43 | 1  | 0 | 0.09  | 4500 | 1444  |
| >tr A0A5F4C1S8 A0A5F4C1S8_CANLF E3 ubiquitin-protein ligase CBL OS=Canis lupus familiaris OX=9615 GN=CBL PE=4 SV=1                      | 1.50  | 0.48 | 198.40 | 330371188.7 | 50 | 2  | 0 | 0.91  | 773  | 1308  |
| >tr F1PR54 F1PR54_CANLF Lactotransferrin OS=Canis lupus familiaris OX=9615 GN=LTF PE=3 SV=1                                             | 9.42  | 3.49 | 352.00 | 328762076.3 | 51 | 9  | 1 | 11.02 | 708  | 40436 |
| >tr F6Y6X6 F6Y6X6_CANLF IQ motif containing GTPase activating protein 3 OS=Canis lupus familiaris OX=9615 GN=IQGAP3 PE=4 SV=2           | 0.18  | 0.06 | 91.10  | 326817609.0 | 19 | 3  | 1 | 0.95  | 1693 | 7673  |
| >tr F1PJ71 F1PJ71_CANLF Glutathione peroxidase OS=Canis lupus familiaris OX=9615 GN=GPX5 PE=3 SV=2                                      | 6.50  | 2.91 | 302.20 | 318253471.2 | 21 | 6  | 1 | 29.86 | 221  | 19009 |
| >tr Q9XSV4 Q9XSV4_CANLF CE10 protein OS=Canis lupus familiaris OX=9615 GN=ce10 PE=2 SV=1                                                | 6.60  | 3.56 | 400.20 | 310914392.6 | 43 | 2  | 0 | 9.09  | 110  | 41542 |
| >tr Q9XSV4 Q9XSV4_CANLF CE10 protein OS=Canis lupus familiaris OX=9615 GN=ce10 PE=2 SV=1                                                | 6.23  | 3.27 | 380.10 | 309017826.8 | 38 | 2  | 0 | 9.09  | 110  | 41542 |
| >tr A0A5F4D6L9 A0A5F4D6L9_CANLF Sacsin molecular chaperone OS=Canis lupus familiaris OX=9615 GN=SACS PE=4 SV=1                          | 1.31  | 0.38 | 241.30 | 305031485.1 | 27 | 4  | 0 | 0.53  | 4500 | 1444  |
| >tr A0A5F4CHL0 A0A5F4CHL0_CANLF Anoctamin OS=Canis lupus familiaris OX=9615 GN=ANO9 PE=3 SV=1                                           | 0.65  | 0.39 | 176.50 | 302257152.0 | 14 | 1  | 0 | 1.82  | 824  | 37323 |
| >sp Q9XS65 PTGDS_CANLF Prostaglandin-H2 D-isomerase OS=Canis lupus familiaris OX=9615 GN=PTGDS PE=2 SV=1                                | 3.47  | 1.98 | 327.80 | 295884114.0 | 14 | 2  | 1 | 10.47 | 191  | 165   |
| >sp E2RKA8 RL32_CANLF 60S ribosomal protein L32 OS=Canis lupus familiaris OX=9615 GN=RPL32 PE=1 SV=1                                    | 0.10  | 0.00 | 57.60  | 284373062.5 | 39 | 1  | 0 | 2.22  | 135  | 275   |
| >tr F1PJ71 F1PJ71_CANLF Glutathione peroxidase OS=Canis lupus familiaris OX=9615 GN=GPX5 PE=3 SV=2                                      | 6.21  | 3.02 | 260.80 | 279752926.7 | 21 | 5  | 1 | 24.89 | 221  | 19009 |
| >tr A0A5F4BVF3 A0A5F4BVF3_CANLF Lactotransferrin OS=Canis lupus familiaris OX=9615 GN=LTF PE=3 SV=1                                     | 3.85  | 1.27 | 312.30 | 273240796.5 | 28 | 5  | 0 | 8.15  | 626  | 32850 |

|                                                                                                                                               |       |      |        |             |    |    |   |       |      |       |
|-----------------------------------------------------------------------------------------------------------------------------------------------|-------|------|--------|-------------|----|----|---|-------|------|-------|
| >tr F1PR54 F1PR54_CANLF Lactotransferrin OS=Canis lupus familiaris OX=9615 GN=LTF PE=3 SV=1                                                   | 21.66 | 3.33 | 323.80 | 266657122.3 | 49 | 12 | 1 | 16.38 | 708  | 40436 |
| >tr F1PGF6 F1PGF6_CANLF Sprouty related EVH1 domain containing 1 OS=Canis lupus familiaris OX=9615 GN=SPRED1 PE=4 SV=2                        | 0.24  | 0.02 | 107.10 | 258992144.8 | 20 | 1  | 0 | 0.90  | 443  | 10620 |
| >tr A0A5F4D6L9 A0A5F4D6L9_CANLF Sacsin molecular chaperone OS=Canis lupus familiaris OX=9615 GN=SACS PE=4 SV=1                                | 1.31  | 0.36 | 238.10 | 258707327.3 | 51 | 4  | 0 | 0.53  | 4500 | 1444  |
| >tr J9PAQ2 J9PAQ2_CANLF Cyclin N-terminal domain-containing protein OS=Canis lupus familiaris OX=9615 PE=3 SV=1                               | 0.62  | 0.38 | 54.10  | 255892985.7 | 13 | 1  | 0 | 1.25  | 400  | 2385  |
| >tr A0A5F4CR89 A0A5F4CR89_CANLF Voltage-dependent R-type calcium channel subunit alpha OS=Canis lupus familiaris OX=9615 GN=CACNA1E PE=3 SV=1 | 0.61  | 0.38 | 54.10  | 255892985.7 | 13 | 1  | 0 | 0.19  | 2688 | 1145  |
| >tr F1P6X5 F1P6X5_CANLF ST6 N-acetylgalactosaminide alpha-2,6-sialyltransferase 5 OS=Canis lupus familiaris OX=9615 GN=ST6GALNAC5 PE=3 SV=3   | 0.22  | 0.02 | 84.50  | 246113203.8 | 19 | 1  | 0 | 1.18  | 338  | 4902  |
| >sp O18840 ACTB_CANLF Actin, cytoplasmic 1 OS=Canis lupus familiaris OX=9615 GN=ACTB PE=2 SV=3                                                | 1.78  | 1.56 | 240.90 | 226071178.5 | 12 | 2  | 0 | 7.73  | 375  | 642   |
| >tr Q9XSV4 Q9XSV4_CANLF CE10 protein OS=Canis lupus familiaris OX=9615 GN=ce10 PE=2 SV=1                                                      | 5.37  | 3.36 | 320.20 | 223705143.2 | 44 | 3  | 0 | 12.73 | 110  | 41542 |
| >tr A0A5F4BVF3 A0A5F4BVF3_CANLF Lactotransferrin OS=Canis lupus familiaris OX=9615 GN=LTF PE=3 SV=1                                           | 3.73  | 1.41 | 237.30 | 221525134.1 | 30 | 3  | 0 | 3.99  | 626  | 32850 |
| >tr Q9XSV4 Q9XSV4_CANLF CE10 protein OS=Canis lupus familiaris OX=9615 GN=ce10 PE=2 SV=1                                                      | 1.65  | 0.82 | 333.90 | 215728728.2 | 23 | 3  | 0 | 14.55 | 110  | 41542 |
| >sp O18840 ACTB_CANLF Actin, cytoplasmic 1 OS=Canis lupus familiaris OX=9615 GN=ACTB PE=2 SV=3                                                | 6.01  | 3.93 | 316.40 | 215049909.7 | 16 | 3  | 0 | 10.13 | 375  | 642   |
| >tr F1PJH2 F1PJH2_CANLF FAT atypical cadherin 3 OS=Canis lupus familiaris OX=9615 GN=FAT3 PE=4 SV=3                                           | 0.10  | 0.00 | 50.40  | 214399990.1 | 30 | 2  | 2 | 0.11  | 4557 | 3984  |
| >sp O18840 ACTB_CANLF Actin, cytoplasmic 1 OS=Canis lupus familiaris OX=9615 GN=ACTB PE=2 SV=3                                                | 4.29  | 3.13 | 343.40 | 208868607.2 | 18 | 2  | 0 | 5.33  | 375  | 642   |
| >tr Q9XSV4 Q9XSV4_CANLF CE10 protein OS=Canis lupus familiaris OX=9615 GN=ce10 PE=2 SV=1                                                      | 5.67  | 3.77 | 288.00 | 205217653.1 | 30 | 3  | 0 | 12.73 | 110  | 41542 |
| >tr J9PAQ2 J9PAQ2_CANLF Cyclin N-terminal domain-containing protein OS=Canis lupus familiaris OX=9615 PE=3 SV=1                               | 0.10  | 0.01 | 58.20  | 195241904.1 | 11 | 1  | 0 | 1.25  | 400  | 2385  |
| >tr A0A5F4CR89 A0A5F4CR89_CANLF Voltage-dependent R-type calcium channel subunit alpha OS=Canis lupus familiaris OX=9615 GN=CACNA1E PE=3 SV=1 | 0.10  | 0.01 | 58.20  | 195241904.1 | 11 | 1  | 0 | 0.19  | 2688 | 1145  |
| >tr A0A5F4BVF3 A0A5F4BVF3_CANLF Lactotransferrin OS=Canis lupus familiaris OX=9615 GN=LTF PE=3 SV=1                                           | 8.76  | 3.38 | 331.90 | 192363156.0 | 39 | 6  | 0 | 9.42  | 626  | 32850 |
| >sp Q28895 NPC2_CANLF NPC intracellular cholesterol transporter 2 OS=Canis lupus familiaris OX=9615 GN=NPC2 PE=2 SV=1                         | 10.26 | 4.49 | 381.70 | 191672362.0 | 21 | 4  | 0 | 30.20 | 149  | 153   |
| >sp Q28895 NPC2_CANLF NPC intracellular cholesterol transporter 2 OS=Canis lupus familiaris OX=9615 GN=NPC2 PE=2 SV=1                         | 8.08  | 3.25 | 414.00 | 187319398.5 | 27 | 4  | 0 | 30.20 | 149  | 153   |
| >tr A0A5F4D9S5 A0A5F4D9S5_CANLF Hyaluronoglucosaminidase OS=Canis lupus familiaris OX=9615 GN=CEMIP PE=3 SV=1                                 | 0.81  | 0.57 | 198.20 | 187265362.7 | 13 | 1  | 0 | 0.24  | 1684 | 9775  |
| >tr J9P0B4 J9P0B4_CANLF Tudor domain containing 15 OS=Canis lupus familiaris OX=9615 GN=TDRD15 PE=4 SV=2                                      | 1.59  | 1.43 | 231.60 | 186749628.5 | 9  | 1  | 0 | 0.57  | 2105 | 4188  |
| >tr A0A5F4CCF4 A0A5F4CCF4_CANLF Activated leukocyte cell adhesion molecule OS=Canis lupus familiaris OX=9615 GN=ALCAM PE=4 SV=1               | 0.10  | 0.00 | 19.40  | 183809298.5 | 17 | 1  | 1 | 0.74  | 542  | 12753 |

|                                                                                                                                       |       |      |        |             |    |   |   |       |       |       |
|---------------------------------------------------------------------------------------------------------------------------------------|-------|------|--------|-------------|----|---|---|-------|-------|-------|
| >tr A0A5F4DC90 A0A5F4DC90_CANLF Marker of proliferation Ki-67 OS=Canis lupus familiaris OX=9615 GN=MKI67 PE=4 SV=1                    | 0.10  | 0.00 | 19.40  | 183809298.5 | 17 | 1 | 1 | 0.16  | 2529  | 1622  |
| >sp Q28895 NPC2_CANLF NPC intracellular cholesterol transporter 2 OS=Canis lupus familiaris OX=9615 GN=NPC2 PE=2 SV=1                 | 11.28 | 5.59 | 422.90 | 182362786.5 | 25 | 4 | 0 | 30.20 | 149   | 153   |
| >sp O18840 ACTB_CANLF Actin, cytoplasmic 1 OS=Canis lupus familiaris OX=9615 GN=ACTB PE=2 SV=3                                        | 2.31  | 1.21 | 193.70 | 178525809.1 | 10 | 2 | 0 | 7.73  | 375   | 642   |
| >tr A0A5F4C5Q4 A0A5F4C5Q4_CANLF Protein MCM10 homolog OS=Canis lupus familiaris OX=9615 GN=MCM10 PE=3 SV=1                            | 0.10  | 0.00 | 14.70  | 176286212.2 | 15 | 1 | 0 | 0.47  | 856   | 2094  |
| >tr A0A5F4BU36 A0A5F4BU36_CANLF Titin OS=Canis lupus familiaris OX=9615 GN=TTN PE=3 SV=1                                              | 0.23  | 0.03 | 38.30  | 175131771.3 | 15 | 2 | 0 | 0.04  | 27097 | 33785 |
| >tr A0A5F4D9S5 A0A5F4D9S5_CANLF Hyaluronoglucosaminidase OS=Canis lupus familiaris OX=9615 GN=CEMIP PE=3 SV=1                         | 0.27  | 0.04 | 187.80 | 169746454.8 | 13 | 1 | 0 | 0.24  | 1684  | 9775  |
| >sp Q2PQH8 GDE_CANLF Glycogen debranching enzyme OS=Canis lupus familiaris OX=9615 GN=AGL PE=2 SV=1                                   | 0.70  | 0.34 | 78.10  | 168347768.2 | 13 | 2 | 0 | 0.26  | 1533  | 23    |
| >tr F1PBU5 F1PBU5_CANLF Non-specific serine/threonine protein kinase OS=Canis lupus familiaris OX=9615 GN=SMG1 PE=3 SV=3              | 0.95  | 0.39 | 163.60 | 167474779.0 | 11 | 2 | 0 | 0.17  | 3634  | 6898  |
| >tr A0A5K1V0D8 A0A5K1V0D8_CANLF Sulfatase 2 OS=Canis lupus familiaris OX=9615 GN=SULF2 PE=3 SV=1                                      | 0.42  | 0.17 | 181.60 | 157954121.7 | 15 | 2 | 0 | 0.81  | 859   | 1192  |
| >tr A0A5F4DHJ7 A0A5F4DHJ7_CANLF APC-binding protein EB1 OS=Canis lupus familiaris OX=9615 PE=3 SV=1                                   | 0.10  | 0.00 | 33.60  | 156720911.0 | 19 | 2 | 2 | 1.67  | 300   | 38718 |
| >tr A0A5F4BVF3 A0A5F4BVF3_CANLF Lactotransferrin OS=Canis lupus familiaris OX=9615 GN=LTF PE=3 SV=1                                   | 3.63  | 2.38 | 321.00 | 153715851.7 | 31 | 4 | 0 | 5.91  | 626   | 32850 |
| >sp Q9XS65 PTGDS_CANLF Prostaglandin-H2 D-isomerase OS=Canis lupus familiaris OX=9615 GN=PTGDS PE=2 SV=1                              | 2.19  | 1.42 | 297.60 | 149308819.0 | 12 | 2 | 0 | 10.47 | 191   | 165   |
| >sp O18840 ACTB_CANLF Actin, cytoplasmic 1 OS=Canis lupus familiaris OX=9615 GN=ACTB PE=2 SV=3                                        | 7.57  | 4.92 | 325.70 | 148633565.9 | 22 | 2 | 0 | 5.33  | 375   | 642   |
| >tr F1PR54 F1PR54_CANLF Lactotransferrin OS=Canis lupus familiaris OX=9615 GN=LTF PE=3 SV=1                                           | 2.12  | 0.75 | 244.50 | 148619287.0 | 21 | 4 | 0 | 5.23  | 708   | 40436 |
| >tr F1PJY1 F1PJY1_CANLF Mannosyl-glycoprotein endo-beta-N-acetylglucosaminidase OS=Canis lupus familiaris OX=9615 GN=ENGASE PE=3 SV=3 | 1.06  | 0.39 | 154.00 | 146672909.4 | 17 | 3 | 2 | 1.74  | 690   | 32761 |
| >sp O18840 ACTB_CANLF Actin, cytoplasmic 1 OS=Canis lupus familiaris OX=9615 GN=ACTB PE=2 SV=3                                        | 3.78  | 1.84 | 297.70 | 143880969.5 | 18 | 3 | 0 | 9.87  | 375   | 642   |
| >tr J9P6V7 J9P6V7_CANLF HTH CENPB-type domain-containing protein OS=Canis lupus familiaris OX=9615 GN=LOC102153482 PE=3 SV=2          | 0.10  | 0.06 | 20.10  | 143181095.0 | 2  | 1 | 0 | 0.85  | 702   | 13682 |
| >sp O18840 ACTB_CANLF Actin, cytoplasmic 1 OS=Canis lupus familiaris OX=9615 GN=ACTB PE=2 SV=3                                        | 5.00  | 2.91 | 354.90 | 142626884.3 | 14 | 3 | 0 | 10.13 | 375   | 642   |
| >sp P49822 ALBU_CANLF Albumin OS=Canis lupus familiaris OX=9615 GN=ALB PE=1 SV=3                                                      | 1.54  | 1.18 | 254.90 | 141176435.5 | 17 | 5 | 2 | 11.02 | 608   | 490   |
| >tr Q30KS5 Q30KS5_CANLF Beta-defensin 129 OS=Canis lupus familiaris OX=9615 GN=DEFB129 PE=2 SV=1                                      | 2.65  | 2.49 | 340.70 | 137028954.2 | 9  | 1 | 0 | 4.22  | 166   | 41730 |
| >sp Q28895 NPC2_CANLF NPC intracellular cholesterol transporter 2 OS=Canis lupus familiaris OX=9615 GN=NPC2 PE=2 SV=1                 | 5.75  | 4.15 | 358.30 | 136510608.5 | 18 | 2 | 0 | 21.48 | 149   | 153   |
| >tr E2QRT5 E2QRT5_CANLF Structural maintenance of chromosomes protein OS=Canis lupus familiaris OX=9615 GN=SMC1B PE=3 SV=1            | 0.23  | 0.11 | 53.50  | 135883701.4 | 7  | 1 | 0 | 0.49  | 1235  | 2380  |

|                                                                                                                                                   |       |      |        |             |    |   |   |       |      |       |
|---------------------------------------------------------------------------------------------------------------------------------------------------|-------|------|--------|-------------|----|---|---|-------|------|-------|
| >tr F1PCW0 F1PCW0_CANLF Golgin A4 OS=Canis lupus familiaris OX=9615 GN=GOLGA4 PE=4 SV=3                                                           | 0.18  | 0.02 | 35.60  | 134233498.2 | 13 | 2 | 0 | 0.45  | 2239 | 2331  |
| >tr J9P9B1 J9P9B1_CANLF Mitochondrial translational initiation factor 2 OS=Canis lupus familiaris OX=9615 GN=MTIF2 PE=4 SV=2                      | 0.20  | 0.02 | 43.10  | 132212898.4 | 12 | 1 | 0 | 0.75  | 668  | 1755  |
| >tr E2RRF5 E2RRF5_CANLF RNA binding motif protein 19 OS=Canis lupus familiaris OX=9615 GN=RBM19 PE=4 SV=3                                         | 0.10  | 0.01 | 101.40 | 131832452.8 | 44 | 2 | 0 | 0.72  | 970  | 905   |
| >sp Q28895 NPC2_CANLF NPC intracellular cholesterol transporter 2 OS=Canis lupus familiaris OX=9615 GN=NPC2 PE=2 SV=1                             | 10.34 | 3.97 | 448.10 | 131596555.2 | 39 | 5 | 0 | 30.20 | 149  | 153   |
| >tr F1PR54 F1PR54_CANLF Lactotransferrin OS=Canis lupus familiaris OX=9615 GN=LTF PE=3 SV=1                                                       | 5.24  | 1.63 | 235.10 | 127971923.9 | 27 | 8 | 0 | 12.71 | 708  | 40436 |
| >sp Q9XS65 PTGDS_CANLF Prostaglandin-H2 D-isomerase OS=Canis lupus familiaris OX=9615 GN=PTGDS PE=2 SV=1                                          | 4.20  | 2.78 | 330.70 | 123756320.5 | 18 | 3 | 1 | 13.61 | 191  | 165   |
| >tr Q9XSV4 Q9XSV4_CANLF CE10 protein OS=Canis lupus familiaris OX=9615 GN=ce10 PE=2 SV=1                                                          | 3.99  | 2.29 | 391.70 | 122646525.0 | 23 | 2 | 0 | 9.09  | 110  | 41542 |
| >tr F1PJ71 F1PJ71_CANLF Glutathione peroxidase OS=Canis lupus familiaris OX=9615 GN=GPX5 PE=3 SV=2                                                | 1.47  | 0.58 | 271.10 | 122645604.4 | 14 | 4 | 1 | 15.84 | 221  | 19009 |
| >sp O46607 GPX5_CANLF Epididymal secretory glutathione peroxidase OS=Canis lupus familiaris OX=9615 GN=GPX5 PE=2 SV=1                             | 2.25  | 1.76 | 287.00 | 122228480.8 | 8  | 2 | 0 | 4.52  | 221  | 564   |
| >sp O46669 SCNAA_CANLF Sodium channel protein type 10 subunit alpha OS=Canis lupus familiaris OX=9615 GN=SCN10A PE=2 SV=1                         | 1.83  | 0.75 | 139.20 | 121295373.1 | 22 | 6 | 0 | 1.22  | 1962 | 90    |
| >tr A0A5F4CQE4 A0A5F4CQE4_CANLF LARGE xylosyl- and glucuronyltransferase 1 OS=Canis lupus familiaris OX=9615 GN=LARGE1 PE=4 SV=1                  | 0.10  | 0.00 | 91.90  | 119276057.0 | 15 | 1 | 0 | 0.70  | 714  | 7538  |
| >sp P49822 ALBU_CANLF Albumin OS=Canis lupus familiaris OX=9615 GN=ALB PE=1 SV=3                                                                  | 3.89  | 1.45 | 241.20 | 118117499.8 | 16 | 5 | 2 | 8.55  | 608  | 490   |
| >sp Q9XS65 PTGDS_CANLF Prostaglandin-H2 D-isomerase OS=Canis lupus familiaris OX=9615 GN=PTGDS PE=2 SV=1                                          | 4.00  | 1.74 | 334.90 | 117715935.6 | 19 | 4 | 1 | 13.61 | 191  | 165   |
| >sp Q9XSU7 RL27_CANLF 60S ribosomal protein L27 OS=Canis lupus familiaris OX=9615 GN=RPL27 PE=2 SV=3                                              | 0.62  | 0.02 | 60.20  | 117000186.3 | 78 | 1 | 0 | 3.68  | 136  | 314   |
| >tr A0A5F4CQE4 A0A5F4CQE4_CANLF LARGE xylosyl- and glucuronyltransferase 1 OS=Canis lupus familiaris OX=9615 GN=LARGE1 PE=4 SV=1                  | 0.45  | 0.27 | 41.00  | 114868641.5 | 12 | 1 | 0 | 0.70  | 714  | 7538  |
| >tr J9NS29 J9NS29_CANLF Cystatin domain-containing protein OS=Canis lupus familiaris OX=9615 GN=LOC607874 PE=4 SV=2                               | 4.61  | 2.46 | 289.60 | 114468559.1 | 10 | 3 | 0 | 16.29 | 313  | 30016 |
| >tr A0A5F4CAK8 A0A5F4CAK8_CANLF Ankyrin repeat and sterile alpha motif domain containing 1B OS=Canis lupus familiaris OX=9615 GN=ANKS1B PE=4 SV=1 | 0.10  | 0.00 | 49.50  | 114257500.4 | 13 | 2 | 2 | 0.86  | 1281 | 31927 |
| >tr F1PPN1 F1PPN1_CANLF Scaffold attachment factor B2 OS=Canis lupus familiaris OX=9615 GN=SAFB2 PE=4 SV=3                                        | 0.10  | 0.00 | 69.70  | 113741557.9 | 6  | 1 | 0 | 0.63  | 954  | 22763 |
| >sp O18840 ACTB_CANLF Actin, cytoplasmic 1 OS=Canis lupus familiaris OX=9615 GN=ACTB PE=2 SV=3                                                    | 5.84  | 4.16 | 281.40 | 112762253.4 | 20 | 2 | 0 | 5.33  | 375  | 642   |
| >tr F1P884 F1P884_CANLF PiggyBac transposable element derived 5 OS=Canis lupus familiaris OX=9615 GN=PGBD5 PE=4 SV=3                              | 0.24  | 0.12 | 141.60 | 107595841.1 | 7  | 1 | 0 | 2.40  | 458  | 28672 |
| >tr F1PJ71 F1PJ71_CANLF Glutathione peroxidase OS=Canis lupus familiaris OX=9615 GN=GPX5 PE=3 SV=2                                                | 2.53  | 2.00 | 304.60 | 106948021.5 | 16 | 4 | 0 | 25.34 | 221  | 19009 |
| >sp Q28895 NPC2_CANLF NPC intracellular cholesterol transporter 2 OS=Canis lupus familiaris OX=9615 GN=NPC2 PE=2 SV=1                             | 5.37  | 1.81 | 343.30 | 104984185.1 | 14 | 4 | 0 | 30.20 | 149  | 153   |

|                                                                                                                            |      |      |        |             |    |   |   |       |      |       |
|----------------------------------------------------------------------------------------------------------------------------|------|------|--------|-------------|----|---|---|-------|------|-------|
| >tr A0A5F4BZW4 A0A5F4BZW4_CANLF Malonyl-CoA decarboxylase OS=Canis lupus familiaris OX=9615 GN=MLYCD PE=4 SV=1             | 0.48 | 0.34 | 187.00 | 103394674.3 | 8  | 1 | 0 | 1.30  | 461  | 4809  |
| >sp O18840 ACTB_CANLF Actin, cytoplasmic 1 OS=Canis lupus familiaris OX=9615 GN=ACTB PE=2 SV=3                             | 1.94 | 1.72 | 238.10 | 103375480.6 | 12 | 1 | 0 | 2.93  | 375  | 642   |
| >sp Q9MZY0 CP2E1_CANLF Cytochrome P450 2E1 OS=Canis lupus familiaris OX=9615 GN=CYP2E1 PE=2 SV=1                           | 0.10 | 0.03 | 165.90 | 103304842.3 | 6  | 3 | 2 | 4.66  | 494  | 522   |
| >tr A0A5F4C7Q7 A0A5F4C7Q7_CANLF IQ motif and Sec7 domain ArfGEF 1 OS=Canis lupus familiaris OX=9615 GN=IQSEC1 PE=3 SV=1    | 0.17 | 0.02 | 83.80  | 101797261.8 | 10 | 1 | 0 | 0.51  | 971  | 4269  |
| >tr J9NS29 J9NS29_CANLF Cystatin domain-containing protein OS=Canis lupus familiaris OX=9615 GN=LOC607874 PE=4 SV=2        | 1.32 | 1.27 | 245.20 | 101142675.0 | 7  | 1 | 0 | 6.39  | 313  | 30016 |
| >tr E2R186 E2R186_CANLF Fibroblast growth factor receptor OS=Canis lupus familiaris OX=9615 GN=FGFR1 PE=3 SV=3             | 0.12 | 0.02 | 62.60  | 100670644.0 | 13 | 1 | 0 | 0.59  | 853  | 9797  |
| >sp O18840 ACTB_CANLF Actin, cytoplasmic 1 OS=Canis lupus familiaris OX=9615 GN=ACTB PE=2 SV=3                             | 6.15 | 4.10 | 411.00 | 99965065.4  | 11 | 2 | 0 | 5.33  | 375  | 642   |
| >tr E2RA54 E2RA54_CANLF Bromodomain and WD repeat domain containing 3 OS=Canis lupus familiaris OX=9615 GN=BRWD3 PE=4 SV=3 | 0.67 | 0.56 | 187.20 | 97944614.4  | 11 | 2 | 0 | 0.80  | 1750 | 4294  |
| >sp Q28894 WFDC2_CANLF WAP four-disulfide core domain protein 2 OS=Canis lupus familiaris OX=9615 GN=WFDC2 PE=2 SV=1       | 3.06 | 2.68 | 393.10 | 96221301.8  | 20 | 1 | 0 | 6.45  | 124  | 53    |
| >tr F1PI09 F1PI09_CANLF Aldehyde oxidase OS=Canis lupus familiaris OX=9615 GN=AOX2 PE=3 SV=3                               | 2.39 | 2.29 | 228.50 | 96041029.3  | 6  | 1 | 0 | 0.67  | 1347 | 21650 |
| >sp F1PTE3 RAB13_CANLF Ras-related protein Rab-13 OS=Canis lupus familiaris OX=9615 GN=RAB13 PE=1 SV=2                     | 0.50 | 0.23 | 142.90 | 95584726.0  | 6  | 2 | 0 | 2.46  | 203  | 147   |
| >tr Q30KS5 Q30KS5_CANLF Beta-defensin 129 OS=Canis lupus familiaris OX=9615 GN=DEFB129 PE=2 SV=1                           | 1.47 | 1.35 | 326.80 | 93102732.0  | 7  | 1 | 0 | 4.22  | 166  | 41730 |
| >tr A0A5F4D6L9 A0A5F4D6L9_CANLF Sacsin molecular chaperone OS=Canis lupus familiaris OX=9615 GN=SACS PE=4 SV=1             | 1.02 | 0.85 | 229.70 | 92992927.0  | 17 | 4 | 1 | 0.33  | 4500 | 1444  |
| >sp Q2PQH8 GDE_CANLF Glycogen debranching enzyme OS=Canis lupus familiaris OX=9615 GN=AGL PE=2 SV=1                        | 0.42 | 0.09 | 104.80 | 92985336.0  | 15 | 2 | 0 | 0.26  | 1533 | 23    |
| >tr F1PPN1 F1PPN1_CANLF Scaffold attachment factor B2 OS=Canis lupus familiaris OX=9615 GN=SAFB2 PE=4 SV=3                 | 0.15 | 0.07 | 69.40  | 92373389.0  | 5  | 1 | 0 | 0.63  | 954  | 22763 |
| >tr Q9XSV4 Q9XSV4_CANLF CE10 protein OS=Canis lupus familiaris OX=9615 GN=ce10 PE=2 SV=1                                   | 4.13 | 2.46 | 333.50 | 92001608.0  | 28 | 2 | 0 | 9.09  | 110  | 41542 |
| >sp Q2PQH8 GDE_CANLF Glycogen debranching enzyme OS=Canis lupus familiaris OX=9615 GN=AGL PE=2 SV=1                        | 0.45 | 0.18 | 130.60 | 90954014.0  | 14 | 2 | 0 | 0.26  | 1533 | 23    |
| >sp Q9MZY0 CP2E1_CANLF Cytochrome P450 2E1 OS=Canis lupus familiaris OX=9615 GN=CYP2E1 PE=2 SV=1                           | 0.10 | 0.02 | 92.20  | 90796602.3  | 9  | 1 | 1 | 4.05  | 494  | 522   |
| >sp O18840 ACTB_CANLF Actin, cytoplasmic 1 OS=Canis lupus familiaris OX=9615 GN=ACTB PE=2 SV=3                             | 2.55 | 1.19 | 236.40 | 90298869.2  | 14 | 3 | 0 | 9.87  | 375  | 642   |
| >sp Q28895 NPC2_CANLF NPC intracellular cholesterol transporter 2 OS=Canis lupus familiaris OX=9615 GN=NPC2 PE=2 SV=1      | 5.01 | 3.36 | 264.20 | 90121962.8  | 29 | 3 | 0 | 21.48 | 149  | 153   |
| >sp Q9XS65 PTGDS_CANLF Prostaglandin-H2 D-isomerase OS=Canis lupus familiaris OX=9615 GN=PTGDS PE=2 SV=1                   | 2.23 | 1.28 | 283.50 | 89686197.0  | 13 | 3 | 1 | 10.47 | 191  | 165   |
| >tr J9P5T2 J9P5T2_CANLF Non-specific serine/threonine protein kinase OS=Canis lupus familiaris OX=9615 GN=WNK3 PE=4 SV=2   | 0.10 | 0.00 | 45.10  | 89526200.9  | 11 | 1 | 0 | 0.22  | 2294 | 5229  |

|                                                                                                                                                   |      |      |        |            |    |   |   |       |      |       |
|---------------------------------------------------------------------------------------------------------------------------------------------------|------|------|--------|------------|----|---|---|-------|------|-------|
| >tr F1PGF9 F1PGF9_CANLF Rho guanine nucleotide exchange factor 26 OS=Canis lupus familiaris OX=9615 GN=ARHGEF26 PE=4 SV=3                         | 1.39 | 1.29 | 320.30 | 87856755.1 | 6  | 1 | 0 | 0.84  | 594  | 22876 |
| >tr A0A5F4C535 A0A5F4C535_CANLF ADAM metallopeptidase with thrombospondin type 1 motif 13 OS=Canis lupus familiaris OX=9615 GN=ADAMTS13 PE=4 SV=1 | 0.10 | 0.02 | 84.50  | 87599235.6 | 7  | 1 | 0 | 0.90  | 444  | 2664  |
| >sp Q9XS65 PTGDS_CANLF Prostaglandin-H2 D-isomerase OS=Canis lupus familiaris OX=9615 GN=PTGDS PE=2 SV=1                                          | 2.01 | 1.55 | 288.50 | 85454601.9 | 11 | 2 | 1 | 10.47 | 191  | 165   |
| >tr A0A5F4CDY8 A0A5F4CDY8_CANLF Kinesin family member 16B OS=Canis lupus familiaris OX=9615 GN=KIF16B PE=3 SV=1                                   | 0.95 | 0.02 | 85.80  | 85362610.9 | 61 | 1 | 1 | 0.96  | 1245 | 3757  |
| >tr A0A5F4DK55 A0A5F4DK55_CANLF Reverse transcriptase domain-containing protein OS=Canis lupus familiaris OX=9615 PE=4 SV=1                       | 0.50 | 0.23 | 180.50 | 81982953.1 | 7  | 2 | 0 | 0.55  | 1275 | 1651  |
| >tr A0A5F4BVF3 A0A5F4BVF3_CANLF Lactotransferrin OS=Canis lupus familiaris OX=9615 GN=LTF PE=3 SV=1                                               | 1.05 | 0.97 | 275.10 | 81961926.1 | 13 | 3 | 0 | 3.99  | 626  | 32850 |
| >tr F1Q0P9 F1Q0P9_CANLF AT-hook containing transcription factor 1 OS=Canis lupus familiaris OX=9615 GN=AHCTF1 PE=4 SV=3                           | 0.23 | 0.03 | 93.20  | 81588408.8 | 13 | 2 | 0 | 0.26  | 2321 | 1521  |
| >tr F1PI09 F1PI09_CANLF Aldehyde oxidase OS=Canis lupus familiaris OX=9615 GN=AOX2 PE=3 SV=3                                                      | 2.47 | 2.39 | 213.10 | 81422792.8 | 5  | 1 | 0 | 0.67  | 1347 | 21650 |
| >tr F1P7F0 F1P7F0_CANLF DENN domain containing 2A OS=Canis lupus familiaris OX=9615 GN=DENND2A PE=4 SV=3                                          | 0.10 | 0.01 | 34.30  | 80662709.3 | 7  | 1 | 0 | 0.45  | 1104 | 2294  |
| >tr E2R5H9 E2R5H9_CANLF Blood vessel epicardial substance OS=Canis lupus familiaris OX=9615 GN=BVES PE=3 SV=1                                     | 0.50 | 0.44 | 67.50  | 77690368.2 | 4  | 1 | 0 | 1.67  | 360  | 8594  |
| >tr F1PGF9 F1PGF9_CANLF Rho guanine nucleotide exchange factor 26 OS=Canis lupus familiaris OX=9615 GN=ARHGEF26 PE=4 SV=3                         | 0.57 | 0.53 | 266.90 | 76427460.5 | 3  | 1 | 0 | 0.84  | 594  | 22876 |
| >sp O18840 ACTB_CANLF Actin, cytoplasmic 1 OS=Canis lupus familiaris OX=9615 GN=ACTB PE=2 SV=3                                                    | 2.49 | 1.58 | 266.20 | 76102799.8 | 11 | 2 | 0 | 5.07  | 375  | 642   |
| >tr A0A5F4CCD0 A0A5F4CCD0_CANLF Cysteine rich secretory protein 2 OS=Canis lupus familiaris OX=9615 GN=CRISP2 PE=3 SV=1                           | 1.32 | 1.26 | 213.50 | 75936743.2 | 5  | 2 | 0 | 7.07  | 311  | 11017 |
| >tr A0A5F4DHE4 A0A5F4DHE4_CANLF Protein tyrosine phosphatase non-receptor type 22 OS=Canis lupus familiaris OX=9615 GN=PTPN22 PE=4 SV=1           | 0.54 | 0.51 | 173.30 | 75764927.7 | 4  | 2 | 1 | 2.42  | 784  | 5054  |
| >tr J9JHT4 J9JHT4_CANLF Unc-79 homolog, NALCN channel complex subunit OS=Canis lupus familiaris OX=9615 GN=UNC79 PE=4 SV=2                        | 0.36 | 0.27 | 38.30  | 74913627.1 | 6  | 1 | 0 | 0.19  | 2622 | 39915 |
| >tr E2RCT1 E2RCT1_CANLF WAP domain-containing protein OS=Canis lupus familiaris OX=9615 PE=4 SV=2                                                 | 3.06 | 1.64 | 242.50 | 74730589.2 | 12 | 2 | 0 | 9.48  | 116  | 21717 |
| >tr J9NTF0 J9NTF0_CANLF PTPRF interacting protein alpha 1 OS=Canis lupus familiaris OX=9615 GN=PPFIA1 PE=3 SV=2                                   | 0.10 | 0.00 | 6.70   | 74343383.3 | 5  | 1 | 1 | 0.47  | 1288 | 2190  |
| >tr F1PEX6 F1PEX6_CANLF Tyrosine-protein kinase OS=Canis lupus familiaris OX=9615 GN=ABL1 PE=3 SV=2                                               | 0.17 | 0.02 | 219.40 | 74134182.7 | 11 | 1 | 1 | 0.70  | 1150 | 1051  |
| >sp P49822 ALBU_CANLF Albumin OS=Canis lupus familiaris OX=9615 GN=ALB PE=1 SV=3                                                                  | 3.43 | 2.97 | 251.90 | 72775789.7 | 7  | 3 | 0 | 6.91  | 608  | 490   |
| >tr A0A5F4D850 A0A5F4D850_CANLF Structural maintenance of chromosomes protein OS=Canis lupus familiaris OX=9615 GN=SMC3 PE=3 SV=1                 | 0.10 | 0.02 | 40.70  | 72513150.7 | 3  | 1 | 0 | 0.41  | 1219 | 7467  |
| >tr A0A5F4C7X0 A0A5F4C7X0_CANLF Centriolin OS=Canis lupus familiaris OX=9615 GN=CNTRL PE=4 SV=1                                                   | 0.10 | 0.02 | 40.70  | 72513150.7 | 3  | 1 | 0 | 0.20  | 2506 | 3658  |
| >tr J9NZY7 J9NZY7_CANLF Midasin OS=Canis lupus familiaris OX=9615 GN=MDN1 PE=3 SV=2                                                               | 0.10 | 0.02 | 40.70  | 72513150.7 | 3  | 1 | 0 | 0.09  | 5558 | 2169  |

|                                                                                                                                       |      |      |        |            |    |   |   |       |      |       |
|---------------------------------------------------------------------------------------------------------------------------------------|------|------|--------|------------|----|---|---|-------|------|-------|
| >sp Q28894 WFDC2_CANLF WAP four-disulfide core domain protein 2 OS=Canis lupus familiaris OX=9615 GN=WFDC2 PE=2 SV=1                  | 2.29 | 2.07 | 427.50 | 71379011.9 | 12 | 1 | 0 | 6.45  | 124  | 53    |
| >tr A0A5F4BVF3 A0A5F4BVF3_CANLF Lactotransferrin OS=Canis lupus familiaris OX=9615 GN=LTF PE=3 SV=1                                   | 2.55 | 2.36 | 294.00 | 71122865.2 | 10 | 3 | 0 | 3.99  | 626  | 32850 |
| >tr A0A5F4CB08 A0A5F4CB08_CANLF Glutathione transferase OS=Canis lupus familiaris OX=9615 GN=LOC100856518 PE=3 SV=1                   | 0.58 | 0.56 | 199.40 | 71054194.6 | 4  | 1 | 0 | 3.08  | 292  | 4491  |
| >sp Q8WN22 PRKDC_CANLF DNA-dependent protein kinase catalytic subunit OS=Canis lupus familiaris OX=9615 GN=PRKDC PE=2 SV=1            | 1.07 | 0.72 | 83.40  | 70510292.8 | 9  | 3 | 0 | 0.19  | 4144 | 338   |
| >tr A0A5F4DGF5 A0A5F4DGF5_CANLF Alkaline phosphatase OS=Canis lupus familiaris OX=9615 GN=ALPL PE=3 SV=1                              | 5.03 | 3.46 | 347.90 | 69987456.6 | 7  | 3 | 0 | 5.77  | 572  | 6357  |
| >tr A0A5F4CHL0 A0A5F4CHL0_CANLF Anoctamin OS=Canis lupus familiaris OX=9615 GN=ANO9 PE=3 SV=1                                         | 0.44 | 0.38 | 139.70 | 68736909.1 | 4  | 1 | 0 | 1.82  | 824  | 37323 |
| >tr J9NTK2 J9NTK2_CANLF J domain-containing protein OS=Canis lupus familiaris OX=9615 GN=DNAJC12 PE=4 SV=2                            | 0.27 | 0.03 | 202.00 | 68153747.8 | 13 | 1 | 0 | 4.72  | 106  | 2310  |
| >tr E2RIK1 E2RIK1_CANLF Phosphatidylinositol-4-phosphate 3-kinase OS=Canis lupus familiaris OX=9615 GN=PIK3C2G PE=3 SV=3              | 0.10 | 0.01 | 86.40  | 67553350.1 | 3  | 1 | 0 | 0.42  | 1445 | 5924  |
| >sp Q6AW47 EST5A_CANLF Carboxylesterase 5A OS=Canis lupus familiaris OX=9615 GN=CES5A PE=2 SV=1                                       | 3.04 | 1.47 | 266.70 | 66636742.9 | 11 | 4 | 0 | 5.22  | 575  | 629   |
| >tr F1PJ71 F1PJ71_CANLF Glutathione peroxidase OS=Canis lupus familiaris OX=9615 GN=GPX5 PE=3 SV=2                                    | 0.86 | 0.60 | 231.50 | 66067554.5 | 10 | 4 | 0 | 25.34 | 221  | 19009 |
| >tr F1P8L2 F1P8L2_CANLF Thymine DNA glycosylase OS=Canis lupus familiaris OX=9615 GN=TDG PE=4 SV=2                                    | 0.10 | 0.05 | 18.60  | 65118195.8 | 4  | 1 | 0 | 1.97  | 406  | 37574 |
| >tr E2R6E0 E2R6E0_CANLF Lipocln_cytosolic_FA-bd_dom domain-containing protein OS=Canis lupus familiaris OX=9615 GN=LCNL1 PE=3 SV=2    | 2.28 | 2.18 | 228.10 | 64505297.6 | 6  | 1 | 0 | 3.01  | 299  | 1932  |
| >tr A0A5F4CNT4 A0A5F4CNT4_CANLF Microtubule actin crosslinking factor 1 OS=Canis lupus familiaris OX=9615 GN=MACF1 PE=4 SV=1          | 0.85 | 0.71 | 153.50 | 64378332.7 | 8  | 1 | 0 | 0.11  | 7352 | 1251  |
| >tr F1PDQ3 F1PDQ3_CANLF Beta-nerve growth factor OS=Canis lupus familiaris OX=9615 GN=NGF PE=3 SV=3                                   | 0.10 | 0.07 | 37.20  | 63003806.8 | 9  | 3 | 2 | 2.08  | 240  | 6254  |
| >tr J9P436 J9P436_CANLF G protein-coupled receptor 45 OS=Canis lupus familiaris OX=9615 GN=GPR45 PE=4 SV=2                            | 0.10 | 0.07 | 37.20  | 63003806.8 | 9  | 2 | 1 | 1.34  | 373  | 7720  |
| >sp O18840 ACTB_CANLF Actin, cytoplasmic 1 OS=Canis lupus familiaris OX=9615 GN=ACTB PE=2 SV=3                                        | 1.91 | 1.73 | 225.70 | 62856604.7 | 10 | 1 | 0 | 2.93  | 375  | 642   |
| >tr A0A5F4CL05 A0A5F4CL05_CANLF Chloride channel protein OS=Canis lupus familiaris OX=9615 GN=CLCN7 PE=3 SV=1                         | 0.35 | 0.27 | 38.30  | 62752256.0 | 5  | 1 | 0 | 0.59  | 844  | 10399 |
| >sp Q5TJE5 RGL2_CANLF Ral guanine nucleotide dissociation stimulator-like 2 OS=Canis lupus familiaris OX=9615 GN=RGL2 PE=3 SV=1       | 1.32 | 0.93 | 101.00 | 61436340.9 | 4  | 2 | 0 | 0.64  | 780  | 266   |
| >sp Q28298 RRBP1_CANLF Ribosome-binding protein 1 OS=Canis lupus familiaris OX=9615 GN=RRBP1 PE=2 SV=1                                | 0.48 | 0.27 | 99.90  | 61403971.8 | 14 | 3 | 0 | 0.46  | 1534 | 61    |
| >sp Q2PQH8 GDE_CANLF Glycogen debranching enzyme OS=Canis lupus familiaris OX=9615 GN=AGL PE=2 SV=1                                   | 0.98 | 0.39 | 106.20 | 60463153.8 | 13 | 5 | 0 | 0.65  | 1533 | 23    |
| >tr E2RIK1 E2RIK1_CANLF Phosphatidylinositol-4-phosphate 3-kinase OS=Canis lupus familiaris OX=9615 GN=PIK3C2G PE=3 SV=3              | 0.48 | 0.44 | 55.60  | 59105479.1 | 3  | 1 | 0 | 0.42  | 1445 | 5924  |
| >tr F1PJY1 F1PJY1_CANLF Mannosyl-glycoprotein endo-beta-N-acetylglucosaminidase OS=Canis lupus familiaris OX=9615 GN=ENGASE PE=3 SV=3 | 0.25 | 0.02 | 183.30 | 58690567.6 | 13 | 2 | 2 | 1.74  | 690  | 32761 |

|                                                                                                                                                  |      |      |        |            |    |   |   |       |      |       |
|--------------------------------------------------------------------------------------------------------------------------------------------------|------|------|--------|------------|----|---|---|-------|------|-------|
| >tr F1PBU5 F1PBU5_CANLF Non-specific serine/threonine protein kinase OS=Canis lupus familiaris OX=9615 GN=SMG1 PE=3 SV=3                         | 0.80 | 0.49 | 201.10 | 58165901.4 | 13 | 2 | 0 | 0.17  | 3634 | 6898  |
| >tr E2RQN7 E2RQN7_CANLF RNA helicase OS=Canis lupus familiaris OX=9615 GN=DHX35 PE=4 SV=3                                                        | 0.10 | 0.02 | 37.30  | 57891199.6 | 4  | 1 | 0 | 2.95  | 679  | 32613 |
| >sp P62286 ASPM_CANLF Abnormal spindle-like microcephaly-associated protein homolog OS=Canis lupus familiaris OX=9615 GN=ASPM PE=2 SV=2          | 0.94 | 0.36 | 101.20 | 57685539.8 | 6  | 4 | 0 | 0.32  | 3469 | 677   |
| >tr A0A5F4CCD0 A0A5F4CCD0_CANLF Cysteine rich secretory protein 2 OS=Canis lupus familiaris OX=9615 GN=CRISP2 PE=3 SV=1                          | 0.83 | 0.79 | 174.80 | 57143240.6 | 4  | 2 | 0 | 7.07  | 311  | 11017 |
| >tr A0A5K1V0D8 A0A5K1V0D8_CANLF Sulfatase 2 OS=Canis lupus familiaris OX=9615 GN=SULF2 PE=3 SV=1                                                 | 0.46 | 0.36 | 168.00 | 56781003.6 | 6  | 1 | 0 | 0.35  | 859  | 1192  |
| >tr F1PCW0 F1PCW0_CANLF Golgin A4 OS=Canis lupus familiaris OX=9615 GN=GOLGA4 PE=4 SV=3                                                          | 0.10 | 0.00 | 14.70  | 56622341.0 | 8  | 1 | 0 | 0.22  | 2239 | 2331  |
| >tr A0A5F4D9S5 A0A5F4D9S5_CANLF Hyaluronoglucosaminidase OS=Canis lupus familiaris OX=9615 GN=CEMIP PE=3 SV=1                                    | 0.35 | 0.21 | 133.40 | 56062704.2 | 8  | 1 | 0 | 0.24  | 1684 | 9775  |
| >tr E2R856 E2R856_CANLF Myeloid derived growth factor OS=Canis lupus familiaris OX=9615 GN=MYDGF PE=4 SV=3                                       | 0.31 | 0.27 | 29.00  | 56022807.2 | 3  | 1 | 0 | 3.47  | 173  | 26349 |
| >tr A0A5F4CTQ6 A0A5F4CTQ6_CANLF SLC9A3 regulator 2 OS=Canis lupus familiaris OX=9615 GN=SLC9A3R2 PE=4 SV=1                                       | 0.31 | 0.27 | 29.00  | 56022807.2 | 3  | 1 | 0 | 1.90  | 315  | 18010 |
| >tr E2RKA1 E2RKA1_CANLF Tyrosine-protein kinase receptor OS=Canis lupus familiaris OX=9615 GN=NTRK2 PE=3 SV=2                                    | 0.31 | 0.27 | 29.00  | 56022807.2 | 3  | 1 | 0 | 0.73  | 822  | 20603 |
| >tr F1PEA8 F1PEA8_CANLF Phosphatidylinositol-3,4,5-trisphosphate 5-phosphatase OS=Canis lupus familiaris OX=9615 GN=INPP5D PE=3 SV=3             | 0.31 | 0.27 | 29.00  | 56022807.2 | 3  | 1 | 0 | 0.43  | 1399 | 17627 |
| >tr E2QX33 E2QX33_CANLF Coiled-coil and C2 domain containing 1A OS=Canis lupus familiaris OX=9615 GN=CC2D1A PE=3 SV=1                            | 0.10 | 0.03 | 148.20 | 55979391.6 | 5  | 1 | 1 | 0.84  | 951  | 10961 |
| >tr A0A5F4BSC2 A0A5F4BSC2_CANLF Galectin OS=Canis lupus familiaris OX=9615 GN=LGALS4 PE=4 SV=1                                                   | 0.10 | 0.00 | 74.20  | 55878627.6 | 6  | 1 | 0 | 1.62  | 309  | 19997 |
| >tr A0A5F4CM35 A0A5F4CM35_CANLF Glycerophosphodiester phosphodiesterase domain containing 2 OS=Canis lupus familiaris OX=9615 GN=GDPD2 PE=3 SV=1 | 0.10 | 0.00 | 24.40  | 55805501.5 | 9  | 1 | 1 | 0.65  | 614  | 16708 |
| >sp O18840 ACTB_CANLF Actin, cytoplasmic 1 OS=Canis lupus familiaris OX=9615 GN=ACTB PE=2 SV=3                                                   | 1.44 | 1.30 | 287.50 | 55329329.6 | 10 | 2 | 0 | 5.07  | 375  | 642   |
| >sp Q9MZY0 CP2E1_CANLF Cytochrome P450 2E1 OS=Canis lupus familiaris OX=9615 GN=CYP2E1 PE=2 SV=1                                                 | 1.57 | 1.04 | 129.10 | 55324154.9 | 8  | 2 | 1 | 4.66  | 494  | 522   |
| >tr E2RCT1 E2RCT1_CANLF WAP domain-containing protein OS=Canis lupus familiaris OX=9615 PE=4 SV=2                                                | 4.69 | 3.76 | 349.40 | 54634292.4 | 8  | 2 | 0 | 14.66 | 116  | 21717 |
| >tr E2R6E0 E2R6E0_CANLF Lipocln_cytosolic_FA-bd_dom domain-containing protein OS=Canis lupus familiaris OX=9615 GN=LCNL1 PE=3 SV=2               | 2.40 | 2.36 | 135.40 | 54394337.6 | 3  | 1 | 0 | 3.01  | 299  | 1932  |
| >tr A0A5F4CLI1 A0A5F4CLI1_CANLF Histone deacetylase 6 OS=Canis lupus familiaris OX=9615 GN=HDAC6 PE=4 SV=1                                       | 0.49 | 0.45 | 172.70 | 54364173.4 | 3  | 1 | 0 | 0.43  | 1175 | 4057  |
| >tr E2RKA1 E2RKA1_CANLF Tyrosine-protein kinase receptor OS=Canis lupus familiaris OX=9615 GN=NTRK2 PE=3 SV=2                                    | 0.20 | 0.18 | 58.00  | 54282136.4 | 2  | 1 | 0 | 0.73  | 822  | 20603 |
| >tr F1PBJ1 F1PBJ1_CANLF Methylcytosine dioxygenase TET OS=Canis lupus familiaris OX=9615 GN=TET3 PE=3 SV=2                                       | 0.10 | 0.00 | 86.80  | 53409123.6 | 5  | 1 | 0 | 0.28  | 1795 | 1529  |
| >sp P25473 CLUS_CANLF Clusterin OS=Canis lupus familiaris OX=9615 GN=CLU PE=2 SV=1                                                               | 0.38 | 0.34 | 218.40 | 53142113.9 | 3  | 1 | 0 | 0.90  | 445  | 725   |

|                                                                                                                                       |      |      |        |            |    |   |   |       |      |       |
|---------------------------------------------------------------------------------------------------------------------------------------|------|------|--------|------------|----|---|---|-------|------|-------|
| >sp F1PRN2 MYO1D_CANLF Unconventional myosin-Id OS=Canis lupus familiaris OX=9615<br>GN=MYO1D PE=1 SV=2                               | 1.09 | 0.57 | 160.80 | 52902342.3 | 9  | 2 | 0 | 0.60  | 1006 | 763   |
| >tr E2RE16 E2RE16_CANLF Non-specific serine/threonine protein kinase OS=Canis lupus<br>familiaris OX=9615 GN=PAK4 PE=4 SV=1           | 0.34 | 0.08 | 95.30  | 52479900.2 | 41 | 1 | 0 | 0.84  | 592  | 12735 |
| >tr E2RIK1 E2RIK1_CANLF Phosphatidylinositol-4-phosphate 3-kinase OS=Canis lupus<br>familiaris OX=9615 GN=PIK3C2G PE=3 SV=3           | 0.46 | 0.44 | 67.00  | 52439169.9 | 2  | 1 | 0 | 0.42  | 1445 | 5924  |
| >tr E2RCT1 E2RCT1_CANLF WAP domain-containing protein OS=Canis lupus familiaris<br>OX=9615 PE=4 SV=2                                  | 5.07 | 3.13 | 393.10 | 50869292.0 | 8  | 2 | 0 | 14.66 | 116  | 21717 |
| >sp O18840 ACTB_CANLF Actin, cytoplasmic 1 OS=Canis lupus familiaris OX=9615<br>GN=ACTB PE=2 SV=3                                     | 0.61 | 0.47 | 273.20 | 50476927.3 | 8  | 2 | 0 | 5.07  | 375  | 642   |
| >tr J9P7Y2 J9P7Y2_CANLF Angiotensin-converting enzyme OS=Canis lupus familiaris<br>OX=9615 GN=ACE2 PE=3 SV=1                          | 0.10 | 0.02 | 90.80  | 49895948.3 | 3  | 1 | 0 | 1.62  | 804  | 1041  |
| >tr E2RN16 E2RN16_CANLF Mitogen-activated protein kinase kinase kinase 2 OS=Canis lupus<br>familiaris OX=9615 GN=MAP3K2 PE=4 SV=2     | 0.40 | 0.34 | 188.30 | 49798235.8 | 4  | 1 | 0 | 0.97  | 620  | 34325 |
| >tr A0A5F4BYT5 A0A5F4BYT5_CANLF Tyrosine-protein kinase OS=Canis lupus familiaris<br>OX=9615 GN=ZAP70 PE=3 SV=1                       | 0.43 | 0.35 | 99.40  | 47983643.3 | 5  | 1 | 0 | 3.72  | 592  | 15350 |
| >tr A0A5F4DIZ5 A0A5F4DIZ5_CANLF Kinesin-like protein OS=Canis lupus familiaris<br>OX=9615 GN=KIF9 PE=3 SV=1                           | 0.14 | 0.06 | 174.80 | 47784525.6 | 5  | 1 | 0 | 1.50  | 732  | 7709  |
| >tr A0A5F4C730 A0A5F4C730_CANLF Semaphorin 4D OS=Canis lupus familiaris OX=9615<br>GN=SEMA4D PE=3 SV=1                                | 0.23 | 0.15 | 124.20 | 47685286.2 | 5  | 1 | 0 | 0.28  | 1067 | 1802  |
| >tr Q9XSV4 Q9XSV4_CANLF CE10 protein OS=Canis lupus familiaris OX=9615 GN=ce10<br>PE=2 SV=1                                           | 1.04 | 0.40 | 187.20 | 47663466.3 | 15 | 3 | 0 | 12.73 | 110  | 41542 |
| >sp Q6AW47 EST5A_CANLF Carboxylesterase 5A OS=Canis lupus familiaris OX=9615<br>GN=CES5A PE=2 SV=1                                    | 1.74 | 0.82 | 255.20 | 47577384.0 | 8  | 3 | 0 | 3.65  | 575  | 629   |
| >tr A0A5F4DD58 A0A5F4DD58_CANLF Phosphoinositide phospholipase C OS=Canis lupus<br>familiaris OX=9615 GN=PLCD3 PE=4 SV=1              | 0.17 | 0.01 | 52.90  | 46589241.4 | 54 | 2 | 0 | 1.08  | 741  | 3088  |
| >tr A0A5F4C615 A0A5F4C615_CANLF Glucocorticoid receptor OS=Canis lupus familiaris<br>OX=9615 GN=NR3C1 PE=3 SV=1                       | 0.10 | 0.06 | 106.90 | 45155646.5 | 3  | 2 | 1 | 2.76  | 725  | 7049  |
| >tr F1PLV2 F1PLV2_CANLF Peptidyl-prolyl cis-trans isomerase OS=Canis lupus familiaris<br>OX=9615 GN=CSNK1G1 PE=3 SV=3                 | 0.67 | 0.65 | 193.00 | 45151630.6 | 3  | 1 | 0 | 5.35  | 243  | 4290  |
| >sp Q9XSU7 RL27_CANLF 60S ribosomal protein L27 OS=Canis lupus familiaris OX=9615<br>GN=RPL27 PE=2 SV=3                               | 0.54 | 0.02 | 42.80  | 44466788.4 | 74 | 1 | 0 | 3.68  | 136  | 314   |
| >tr F1P8J6 F1P8J6_CANLF RNA helicase OS=Canis lupus familiaris OX=9615 GN=DDX55<br>PE=3 SV=3                                          | 0.28 | 0.24 | 147.60 | 44211263.8 | 3  | 1 | 0 | 1.58  | 568  | 8934  |
| >tr E2R186 E2R186_CANLF Fibroblast growth factor receptor OS=Canis lupus familiaris<br>OX=9615 GN=FGFR1 PE=3 SV=3                     | 0.10 | 0.00 | 116.70 | 43892865.4 | 8  | 1 | 0 | 0.59  | 853  | 9797  |
| >sp P06625 SRPRA_CANLF Signal recognition particle receptor subunit alpha OS=Canis lupus<br>familiaris OX=9615 GN=SRPRA PE=2 SV=2     | 0.14 | 0.05 | 179.10 | 43747251.5 | 5  | 3 | 0 | 2.82  | 638  | 369   |
| >tr F1P7Z8 F1P7Z8_CANLF Coiled-coil domain-containing protein 93 OS=Canis lupus<br>familiaris OX=9615 GN=CCDC93 PE=3 SV=2             | 0.10 | 0.03 | 34.80  | 42083001.7 | 5  | 1 | 0 | 0.63  | 631  | 1813  |
| >tr E2R6E0 E2R6E0_CANLF Lipocln_cytosolic_FA-bd_dom domain-containing protein<br>OS=Canis lupus familiaris OX=9615 GN=LCNL1 PE=3 SV=2 | 2.14 | 2.06 | 224.10 | 42056053.9 | 5  | 1 | 0 | 3.01  | 299  | 1932  |
| >tr A0A5F4BXA7 A0A5F4BXA7_CANLF Leucine rich repeat containing 7 OS=Canis lupus<br>familiaris OX=9615 GN=LRRC7 PE=3 SV=1              | 0.13 | 0.05 | 130.20 | 41644681.3 | 5  | 1 | 0 | 0.39  | 1542 | 2603  |

|                                                                                                                                                  |      |      |        |            |    |   |   |       |      |       |
|--------------------------------------------------------------------------------------------------------------------------------------------------|------|------|--------|------------|----|---|---|-------|------|-------|
| >tr F1PGK9 F1PGK9_CANLF ADAM metallopeptidase with thrombospondin type 1 motif 5 OS=Canis lupus familiaris OX=9615 GN=ADAMTS5 PE=4 SV=3          | 0.12 | 0.02 | 75.80  | 41480860.2 | 27 | 1 | 0 | 0.59  | 845  | 11956 |
| >tr F1PM73 F1PM73_CANLF Palmitoyltransferase OS=Canis lupus familiaris OX=9615 GN=ZDHHC23 PE=3 SV=3                                              | 0.24 | 0.16 | 55.50  | 41316872.2 | 5  | 1 | 0 | 3.98  | 427  | 22460 |
| >tr A0A5F4CM35 A0A5F4CM35_CANLF Glycerophosphodiester phosphodiesterase domain containing 2 OS=Canis lupus familiaris OX=9615 GN=GDPD2 PE=3 SV=1 | 0.10 | 0.01 | 64.70  | 41155352.5 | 4  | 1 | 1 | 0.65  | 614  | 16708 |
| >tr F1PP47 F1PP47_CANLF RE1 silencing transcription factor OS=Canis lupus familiaris OX=9615 GN=REST PE=4 SV=2                                   | 0.10 | 0.03 | 107.10 | 41062721.9 | 5  | 2 | 1 | 0.90  | 996  | 17823 |
| >tr F1PBU5 F1PBU5_CANLF Non-specific serine/threonine protein kinase OS=Canis lupus familiaris OX=9615 GN=SMG1 PE=3 SV=3                         | 1.51 | 0.81 | 177.20 | 40793140.9 | 10 | 2 | 0 | 0.17  | 3634 | 6898  |
| >tr F1PRU0 F1PRU0_CANLF WD_REPEATS_REGION domain-containing protein OS=Canis lupus familiaris OX=9615 GN=TLE7 PE=3 SV=2                          | 0.33 | 0.05 | 31.10  | 40601505.3 | 15 | 1 | 0 | 1.16  | 431  | 22849 |
| >tr E2RCT1 E2RCT1_CANLF WAP domain-containing protein OS=Canis lupus familiaris OX=9615 PE=4 SV=2                                                | 1.47 | 1.40 | 135.90 | 40419871.7 | 3  | 2 | 0 | 9.48  | 116  | 21717 |
| >tr E2R6E0 E2R6E0_CANLF Lipocln_cytosolic_FA-bd_dom domain-containing protein OS=Canis lupus familiaris OX=9615 GN=LCNL1 PE=3 SV=2               | 8.13 | 2.94 | 152.90 | 40061195.9 | 5  | 3 | 0 | 9.36  | 299  | 1932  |
| >tr A0A5F4DGX9 A0A5F4DGX9_CANLF Target of myb1 membrane trafficking protein OS=Canis lupus familiaris OX=9615 GN=TOM1 PE=3 SV=1                  | 0.16 | 0.08 | 164.80 | 39625191.0 | 5  | 1 | 0 | 3.35  | 477  | 40074 |
| >tr A0A5F4CRP9 A0A5F4CRP9_CANLF Tumor suppressor candidate 3 OS=Canis lupus familiaris OX=9615 GN=TUSC3 PE=3 SV=1                                | 0.42 | 0.30 | 84.90  | 38762611.3 | 7  | 1 | 0 | 3.18  | 314  | 6225  |
| >sp Q9XS65 PTGDS_CANLF Prostaglandin-H2 D-isomerase OS=Canis lupus familiaris OX=9615 GN=PTGDS PE=2 SV=1                                         | 9.62 | 2.91 | 344.50 | 38730905.4 | 74 | 4 | 1 | 19.37 | 191  | 165   |
| >tr F1P9J6 F1P9J6_CANLF Zinc finger protein 16 OS=Canis lupus familiaris OX=9615 GN=ZNF16 PE=4 SV=3                                              | 0.38 | 0.36 | 158.40 | 38657674.5 | 2  | 1 | 0 | 1.47  | 680  | 39751 |
| >tr A0A5F4DGF5 A0A5F4DGF5_CANLF Alkaline phosphatase OS=Canis lupus familiaris OX=9615 GN=ALPL PE=3 SV=1                                         | 0.87 | 0.77 | 206.80 | 37988761.9 | 3  | 2 | 0 | 5.77  | 572  | 6357  |
| >tr A0A5F4BXD8 A0A5F4BXD8_CANLF Matrix metallopeptidase 16 OS=Canis lupus familiaris OX=9615 GN=MMP16 PE=3 SV=1                                  | 0.45 | 0.43 | 183.90 | 37714034.6 | 2  | 1 | 0 | 2.65  | 566  | 6476  |
| >tr E2R6E0 E2R6E0_CANLF Lipocln_cytosolic_FA-bd_dom domain-containing protein OS=Canis lupus familiaris OX=9615 GN=LCNL1 PE=3 SV=2               | 1.71 | 1.55 | 189.00 | 37651996.4 | 9  | 1 | 0 | 3.68  | 299  | 1932  |
| >sp Q6AW47 EST5A_CANLF Carboxylesterase 5A OS=Canis lupus familiaris OX=9615 GN=CES5A PE=2 SV=1                                                  | 0.59 | 0.53 | 164.10 | 37613594.5 | 3  | 2 | 0 | 3.83  | 575  | 629   |
| >sp P49822 ALBU_CANLF Albumin OS=Canis lupus familiaris OX=9615 GN=ALB PE=1 SV=3                                                                 | 1.27 | 0.75 | 97.60  | 37265884.2 | 6  | 2 | 0 | 4.77  | 608  | 490   |
| >tr A0A5K1V0D8 A0A5K1V0D8_CANLF Sulfatase 2 OS=Canis lupus familiaris OX=9615 GN=SULF2 PE=3 SV=1                                                 | 0.29 | 0.13 | 207.90 | 37025926.2 | 9  | 1 | 0 | 0.35  | 859  | 1192  |
| >tr A0A5F4BSC2 A0A5F4BSC2_CANLF Galectin OS=Canis lupus familiaris OX=9615 GN=LGALS4 PE=4 SV=1                                                   | 0.10 | 0.02 | 6.00   | 36912888.7 | 3  | 1 | 0 | 1.62  | 309  | 19997 |
| >sp Q6AW47 EST5A_CANLF Carboxylesterase 5A OS=Canis lupus familiaris OX=9615 GN=CES5A PE=2 SV=1                                                  | 0.70 | 0.36 | 189.80 | 36484739.2 | 2  | 2 | 0 | 1.57  | 575  | 629   |
| >sp Q2PQH8 GDE_CANLF Glycogen debranching enzyme OS=Canis lupus familiaris OX=9615 GN=AGL PE=2 SV=1                                              | 0.51 | 0.50 | 81.40  | 36251439.8 | 2  | 1 | 0 | 0.13  | 1533 | 23    |
| >tr A0A5F4CQE4 A0A5F4CQE4_CANLF LARGE xylosyl- and glucuronyltransferase 1 OS=Canis lupus familiaris OX=9615 GN=LARGE1 PE=4 SV=1                 | 0.10 | 0.00 | 17.90  | 36057021.7 | 5  | 1 | 0 | 0.70  | 714  | 7538  |

|                                                                                                                                                 |      |      |        |            |    |   |   |      |      |       |
|-------------------------------------------------------------------------------------------------------------------------------------------------|------|------|--------|------------|----|---|---|------|------|-------|
| >tr A0A5F4CYM0 A0A5F4CYM0_CANLF Quiescin sulphydryl oxidase 2 OS=Canis lupus familiaris OX=9615 GN=QSOX2 PE=4 SV=1                              | 0.10 | 0.02 | 76.90  | 35835400.1 | 10 | 1 | 0 | 2.52 | 636  | 1464  |
| >tr F1PQZ1 F1PQZ1_CANLF Hyaluronan binding protein 4 OS=Canis lupus familiaris OX=9615 GN=HABP4 PE=4 SV=2                                       | 0.15 | 0.09 | 161.80 | 35234505.3 | 4  | 1 | 0 | 7.91 | 215  | 39227 |
| >tr J9NTK2 J9NTK2_CANLF J domain-containing protein OS=Canis lupus familiaris OX=9615 GN=DNAJC12 PE=4 SV=2                                      | 0.10 | 0.03 | 121.30 | 34933309.7 | 2  | 1 | 0 | 4.72 | 106  | 2310  |
| >tr A0A5F4BZW4 A0A5F4BZW4_CANLF Malonyl-CoA decarboxylase OS=Canis lupus familiaris OX=9615 GN=MLYCD PE=4 SV=1                                  | 0.25 | 0.17 | 204.20 | 34887633.1 | 5  | 1 | 0 | 1.30 | 461  | 4809  |
| >tr A0A5F4D0B3 A0A5F4D0B3_CANLF Bromodomain containing 1 OS=Canis lupus familiaris OX=9615 GN=BRD1 PE=4 SV=1                                    | 0.19 | 0.17 | 154.30 | 34688350.5 | 2  | 1 | 0 | 0.81 | 1112 | 1580  |
| >tr J9NS28 J9NS28_CANLF RBR-type E3 ubiquitin transferase OS=Canis lupus familiaris OX=9615 GN=ANKIB1 PE=4 SV=2                                 | 0.23 | 0.19 | 37.00  | 34454786.8 | 3  | 1 | 0 | 2.33 | 988  | 26345 |
| >tr J9P3V5 J9P3V5_CANLF FAM75 domain-containing protein OS=Canis lupus familiaris OX=9615 PE=4 SV=2                                             | 0.10 | 0.08 | 173.80 | 34311408.5 | 2  | 1 | 0 | 0.36 | 1370 | 32063 |
| >tr A0A5F4CT98 A0A5F4CT98_CANLF [Heparan sulfate]-glucosamine N-sulfotransferase OS=Canis lupus familiaris OX=9615 GN=NDST1 PE=3 SV=1           | 0.14 | 0.14 | 177.60 | 34027788.6 | 5  | 2 | 1 | 2.04 | 932  | 9786  |
| >tr J9P7Y2 J9P7Y2_CANLF Angiotensin-converting enzyme OS=Canis lupus familiaris OX=9615 GN=ACE2 PE=3 SV=1                                       | 0.10 | 0.02 | 134.00 | 33954793.5 | 4  | 1 | 0 | 1.62 | 804  | 1041  |
| >sp P49822 ALBU_CANLF Albumin OS=Canis lupus familiaris OX=9615 GN=ALB PE=1 SV=3                                                                | 0.30 | 0.25 | 178.50 | 33756533.6 | 7  | 2 | 1 | 2.30 | 608  | 490   |
| >tr E2R4F0 E2R4F0_CANLF Cadherin EGF LAG seven-pass G-type receptor 2 OS=Canis lupus familiaris OX=9615 GN=CELSR2 PE=3 SV=2                     | 0.14 | 0.04 | 72.20  | 33750901.4 | 6  | 3 | 3 | 0.65 | 2919 | 12898 |
| >tr F1PBU5 F1PBU5_CANLF Non-specific serine/threonine protein kinase OS=Canis lupus familiaris OX=9615 GN=SMG1 PE=3 SV=3                        | 0.36 | 0.31 | 167.70 | 33714348.1 | 4  | 1 | 0 | 0.08 | 3634 | 6898  |
| >tr A0A5F4C9Z9 A0A5F4C9Z9_CANLF UTP20 small subunit processome component OS=Canis lupus familiaris OX=9615 GN=UTP20 PE=4 SV=1                   | 0.15 | 0.15 | 72.60  | 33460592.3 | 2  | 2 | 1 | 0.44 | 2758 | 1779  |
| >tr E2QXW6 E2QXW6_CANLF Patatin like phospholipase domain containing 7 OS=Canis lupus familiaris OX=9615 GN=PNPLA7 PE=3 SV=2                    | 0.10 | 0.06 | 35.90  | 33412088.3 | 3  | 1 | 1 | 1.58 | 1456 | 31798 |
| >tr E2RGH9 E2RGH9_CANLF HECT-type E3 ubiquitin transferase OS=Canis lupus familiaris OX=9615 GN=HECTD1 PE=3 SV=2                                | 0.10 | 0.06 | 147.40 | 33389415.2 | 2  | 1 | 0 | 0.31 | 2609 | 36968 |
| >tr F1PSM3 F1PSM3_CANLF Symplekin OS=Canis lupus familiaris OX=9615 GN=SYMPK PE=4 SV=2                                                          | 0.10 | 0.00 | 29.80  | 33109043.8 | 4  | 2 | 2 | 0.39 | 1275 | 9214  |
| >tr E2QUV0 E2QUV0_CANLF Nipped-B protein OS=Canis lupus familiaris OX=9615 GN=NIPBL PE=3 SV=3                                                   | 0.10 | 0.00 | 29.80  | 33109043.8 | 4  | 2 | 2 | 0.18 | 2722 | 14722 |
| >tr A0A5F4DFY1 A0A5F4DFY1_CANLF SHH signaling and ciliogenesis regulator SDCCAG8 OS=Canis lupus familiaris OX=9615 GN=SDCCAG8 PE=4 SV=1         | 0.40 | 0.08 | 31.50  | 33068258.0 | 17 | 1 | 1 | 0.59 | 673  | 17765 |
| >tr A0A5F4D7Y5 A0A5F4D7Y5_CANLF Pleckstrin homology, MyTH4 and FERM domain containing H1 OS=Canis lupus familiaris OX=9615 GN=PLEKHH1 PE=4 SV=1 | 1.08 | 1.02 | 260.40 | 33039458.3 | 5  | 1 | 0 | 0.30 | 1342 | 5979  |
| >tr A0A5F4DD58 A0A5F4DD58_CANLF Phosphoinositide phospholipase C OS=Canis lupus familiaris OX=9615 GN=PLCD3 PE=4 SV=1                           | 0.90 | 0.80 | 205.90 | 33023756.5 | 6  | 1 | 0 | 0.40 | 741  | 3088  |
| >tr E2RN56 E2RN56_CANLF Zinc finger CCCH-type containing 13 OS=Canis lupus familiaris OX=9615 GN=ZC3H13 PE=4 SV=3                               | 0.58 | 0.54 | 228.50 | 32881674.4 | 3  | 1 | 0 | 0.24 | 1660 | 1446  |
| >tr L7MTP6 L7MTP6_CANLF Myosin heavy chain 3 OS=Canis lupus familiaris OX=9615 GN=MYH3 PE=3 SV=1                                                | 0.10 | 0.03 | 35.90  | 32077979.8 | 3  | 1 | 0 | 0.26 | 1940 | 17787 |

|                                                                                                                                            |      |      |        |            |    |   |   |       |      |       |
|--------------------------------------------------------------------------------------------------------------------------------------------|------|------|--------|------------|----|---|---|-------|------|-------|
| >tr E2R8U5 E2R8U5_CANLF Collagen type XXIV alpha 1 chain OS=Canis lupus familiaris<br>OX=9615 GN=COL24A1 PE=4 SV=3                         | 0.10 | 0.10 | 124.20 | 31867195.8 | 2  | 2 | 1 | 0.82  | 1709 | 25162 |
| >tr F1P9I2 F1P9I2_CANLF Cdk5 and Abl enzyme substrate 1 OS=Canis lupus familiaris<br>OX=9615 GN=CABLES1 PE=4 SV=3                          | 0.10 | 0.03 | 139.60 | 31695250.6 | 2  | 1 | 0 | 0.92  | 757  | 13186 |
| >tr F1PJY1 F1PJY1_CANLF Mannosyl-glycoprotein endo-beta-N-acetylglucosaminidase<br>OS=Canis lupus familiaris OX=9615 GN=ENGASE PE=3 SV=3   | 0.10 | 0.02 | 117.80 | 31614381.6 | 4  | 1 | 1 | 1.74  | 690  | 32761 |
| >sp Q9XS65 PTGDS_CANLF Prostaglandin-H2 D-isomerase OS=Canis lupus familiaris<br>OX=9615 GN=PTGDS PE=2 SV=1                                | 1.34 | 0.77 | 257.70 | 31592600.2 | 9  | 2 | 1 | 10.47 | 191  | 165   |
| >sp Q9XS65 PTGDS_CANLF Prostaglandin-H2 D-isomerase OS=Canis lupus familiaris<br>OX=9615 GN=PTGDS PE=2 SV=1                                | 0.24 | 0.18 | 119.40 | 31259064.7 | 5  | 2 | 1 | 10.47 | 191  | 165   |
| >tr J9NTK2 J9NTK2_CANLF J domain-containing protein OS=Canis lupus familiaris OX=9615<br>GN=DNAJC12 PE=4 SV=2                              | 0.57 | 0.53 | 161.40 | 31149079.9 | 3  | 1 | 0 | 4.72  | 106  | 2310  |
| >tr A0A5F4D6L9 A0A5F4D6L9_CANLF Sacsin molecular chaperone OS=Canis lupus<br>familiaris OX=9615 GN=SACS PE=4 SV=1                          | 0.20 | 0.14 | 226.80 | 30959033.6 | 9  | 4 | 0 | 0.58  | 4500 | 1444  |
| >tr A0A5F4DIG1 A0A5F4DIG1_CANLF Interleukin 4 induced 1 OS=Canis lupus familiaris<br>OX=9615 GN=IL4I1 PE=4 SV=1                            | 0.53 | 0.45 | 189.40 | 30842373.8 | 5  | 3 | 0 | 5.08  | 571  | 21105 |
| >tr E2RRP1 E2RRP1_CANLF Butyryl-CoA dehydrogenase OS=Canis lupus familiaris<br>OX=9615 GN=IVD PE=3 SV=2                                    | 0.12 | 0.08 | 95.50  | 30783500.3 | 4  | 1 | 0 | 3.99  | 426  | 10739 |
| >tr J9P432 J9P432_CANLF Glutamine--fructose-6-phosphate transaminase (isomerizing)<br>OS=Canis lupus familiaris OX=9615 GN=GFPT1 PE=4 SV=2 | 0.33 | 0.19 | 113.50 | 30126452.3 | 8  | 1 | 0 | 1.18  | 677  | 7191  |
| >tr A0A5F4DDL6 A0A5F4DDL6_CANLF Molybdenum cofactor sulfuryase OS=Canis lupus<br>familiaris OX=9615 GN=MOCOS PE=3 SV=1                     | 0.10 | 0.05 | 129.20 | 30055326.6 | 3  | 1 | 0 | 0.57  | 876  | 14262 |
| >sp F1PRN2 MYO1D_CANLF Unconventional myosin-IId OS=Canis lupus familiaris OX=9615<br>GN=MYO1D PE=1 SV=2                                   | 0.51 | 0.49 | 158.60 | 29831028.2 | 2  | 1 | 0 | 0.30  | 1006 | 763   |
| >sp E2RED8 AP4M1_CANLF AP-4 complex subunit mu-1 OS=Canis lupus familiaris<br>OX=9615 GN=AP4M1 PE=3 SV=2                                   | 0.77 | 0.61 | 208.80 | 29709839.5 | 9  | 1 | 0 | 0.66  | 452  | 634   |
| >tr A0A5F4DCA4 A0A5F4DCA4_CANLF Reverse transcriptase domain-containing protein<br>OS=Canis lupus familiaris OX=9615 PE=4 SV=1             | 0.51 | 0.49 | 144.60 | 29591909.8 | 2  | 1 | 0 | 0.31  | 978  | 860   |
| >sp P62286 ASPM_CANLF Abnormal spindle-like microcephaly-associated protein homolog<br>OS=Canis lupus familiaris OX=9615 GN=ASPM PE=2 SV=2 | 1.03 | 0.69 | 74.70  | 29560318.9 | 6  | 3 | 0 | 0.23  | 3469 | 677   |
| >tr F1PZB6 F1PZB6_CANLF Alkaline ceramidase OS=Canis lupus familiaris OX=9615<br>GN=ACER1 PE=3 SV=3                                        | 0.59 | 0.42 | 66.80  | 29094250.6 | 13 | 2 | 2 | 4.18  | 263  | 35976 |
| >tr A0A5F4DDT5 A0A5F4DDT5_CANLF Tousled like kinase 1 OS=Canis lupus familiaris<br>OX=9615 GN=TLK1 PE=4 SV=1                               | 0.15 | 0.09 | 157.80 | 29089524.1 | 5  | 1 | 0 | 0.68  | 734  | 7453  |
| >tr A0A5F4CJI0 A0A5F4CJI0_CANLF Folate_rec domain-containing protein OS=Canis lupus<br>familiaris OX=9615 GN=FOLR1 PE=3 SV=1               | 0.61 | 0.57 | 231.20 | 28756277.6 | 3  | 1 | 0 | 3.14  | 255  | 10075 |
| >sp A2IBY8 MIP_CANLF Lens fiber major intrinsic protein OS=Canis lupus familiaris<br>OX=9615 GN=MIP PE=2 SV=1                              | 0.12 | 0.08 | 85.30  | 28513209.4 | 13 | 1 | 0 | 1.90  | 263  | 112   |
| >tr J9NW72 J9NW72_CANLF Sperm associated antigen 8 OS=Canis lupus familiaris OX=9615<br>GN=SPAG8 PE=4 SV=1                                 | 0.79 | 0.69 | 103.30 | 28470734.0 | 6  | 1 | 0 | 4.07  | 442  | 10371 |
| >tr E2RG75 E2RG75_CANLF Inactive ribonuclease-like protein 9 OS=Canis lupus familiaris<br>OX=9615 GN=RNASE9 PE=3 SV=2                      | 3.36 | 3.18 | 276.50 | 28260980.6 | 7  | 2 | 1 | 8.08  | 198  | 41734 |
| >tr E2RCT1 E2RCT1_CANLF WAP domain-containing protein OS=Canis lupus familiaris<br>OX=9615 PE=4 SV=2                                       | 3.82 | 2.59 | 249.00 | 28068068.5 | 5  | 2 | 0 | 14.66 | 116  | 21717 |

|                                                                                                                                        |      |      |        |            |    |   |   |      |      |       |
|----------------------------------------------------------------------------------------------------------------------------------------|------|------|--------|------------|----|---|---|------|------|-------|
| >tr J9NS28 J9NS28_CANLF RBR-type E3 ubiquitin transferase OS=Canis lupus familiaris OX=9615 GN=ANKIB1 PE=4 SV=2                        | 0.23 | 0.17 | 62.70  | 27866905.8 | 4  | 1 | 0 | 2.33 | 988  | 26345 |
| >tr A0A5F4DIG1 A0A5F4DIG1_CANLF Interleukin 4 induced 1 OS=Canis lupus familiaris OX=9615 GN=IL4I1 PE=4 SV=1                           | 0.78 | 0.70 | 229.40 | 27633961.0 | 4  | 3 | 0 | 5.08 | 571  | 21105 |
| >sp P49822 ALBU_CANLF Albumin OS=Canis lupus familiaris OX=9615 GN=ALB PE=1 SV=3                                                       | 0.42 | 0.30 | 120.40 | 27519003.0 | 5  | 2 | 1 | 2.30 | 608  | 490   |
| >tr F1P9X0 F1P9X0_CANLF Dolichol phosphate-mannose biosynthesis regulatory protein OS=Canis lupus familiaris OX=9615 GN=DPM2 PE=3 SV=3 | 0.10 | 0.07 | 18.60  | 27294111.0 | 7  | 1 | 1 | 5.95 | 84   | 12958 |
| >tr A0A5F4CYM0 A0A5F4CYM0_CANLF Quiescin sulphydryl oxidase 2 OS=Canis lupus familiaris OX=9615 GN=QSOX2 PE=4 SV=1                     | 0.18 | 0.03 | 137.60 | 27257639.1 | 10 | 1 | 0 | 2.52 | 636  | 1464  |
| >tr Q9XSV4 Q9XSV4_CANLF CE10 protein OS=Canis lupus familiaris OX=9615 GN=ce10 PE=2 SV=1                                               | 1.99 | 1.83 | 273.70 | 27127890.7 | 7  | 2 | 0 | 9.09 | 110  | 41542 |
| >tr A0A5F4BTI7 A0A5F4BTI7_CANLF THUMP domain containing 2 OS=Canis lupus familiaris OX=9615 GN=THUMPD2 PE=3 SV=1                       | 0.10 | 0.00 | 29.80  | 26970400.6 | 3  | 2 | 2 | 1.05 | 478  | 12577 |
| >tr E2RJ91 E2RJ91_CANLF BTB domain containing 7 OS=Canis lupus familiaris OX=9615 GN=BTBD7 PE=4 SV=1                                   | 0.10 | 0.00 | 29.80  | 26970400.6 | 3  | 2 | 2 | 0.44 | 1126 | 21940 |
| >sp O18840 ACTB_CANLF Actin, cytoplasmic 1 OS=Canis lupus familiaris OX=9615 GN=ACTB PE=2 SV=3                                         | 0.10 | 0.06 | 190.60 | 26426006.5 | 3  | 1 | 0 | 2.93 | 375  | 642   |
| >tr J9NTK2 J9NTK2_CANLF J domain-containing protein OS=Canis lupus familiaris OX=9615 GN=DNAJC12 PE=4 SV=2                             | 0.23 | 0.18 | 162.80 | 26409014.4 | 5  | 1 | 0 | 4.72 | 106  | 2310  |
| >tr A0A5F4C887 A0A5F4C887_CANLF O-acyltransferase OS=Canis lupus familiaris OX=9615 GN=DGAT1 PE=3 SV=1                                 | 0.10 | 0.02 | 51.20  | 26301544.2 | 2  | 1 | 0 | 1.93 | 623  | 22414 |
| >tr A0A5F4D848 A0A5F4D848_CANLF Lipase I OS=Canis lupus familiaris OX=9615 GN=LIPI PE=3 SV=1                                           | 0.17 | 0.15 | 170.30 | 26274176.5 | 2  | 1 | 0 | 2.09 | 431  | 1169  |
| >tr A0A5F4C7W7 A0A5F4C7W7_CANLF Phosphatidylinositol-4,5-bisphosphate 3-kinase OS=Canis lupus familiaris OX=9615 GN=PIK3CD PE=3 SV=1   | 0.46 | 0.45 | 159.40 | 26123041.8 | 3  | 1 | 0 | 1.52 | 1051 | 18533 |
| >tr A0A5F4D430 A0A5F4D430_CANLF Transcription factor AP-2 gamma OS=Canis lupus familiaris OX=9615 GN=TFAP2C PE=3 SV=1                  | 0.66 | 0.60 | 167.20 | 25996456.6 | 4  | 1 | 0 | 1.38 | 650  | 9642  |
| >sp P21842 CMA1_CANLF Chymase OS=Canis lupus familiaris OX=9615 GN=CMA1 PE=1 SV=1                                                      | 0.21 | 0.11 | 89.80  | 25921456.0 | 6  | 1 | 0 | 0.80 | 249  | 34    |
| >tr F1PBJ1 F1PBJ1_CANLF Methylcytosine dioxygenase TET OS=Canis lupus familiaris OX=9615 GN=TET3 PE=3 SV=2                             | 0.10 | 0.02 | 32.50  | 25839500.3 | 2  | 1 | 0 | 0.28 | 1795 | 1529  |
| >sp P83509 RHG35_CANLF Rho GTPase-activating protein 35 OS=Canis lupus familiaris OX=9615 GN=ARHGAP35 PE=2 SV=1                        | 0.55 | 0.47 | 115.20 | 25749029.1 | 5  | 1 | 1 | 0.73 | 1500 | 323   |
| >sp P49822 ALBU_CANLF Albumin OS=Canis lupus familiaris OX=9615 GN=ALB PE=1 SV=3                                                       | 0.11 | 0.05 | 208.20 | 25738417.0 | 4  | 1 | 0 | 2.30 | 608  | 490   |
| >sp Q28298 RRBP1_CANLF Ribosome-binding protein 1 OS=Canis lupus familiaris OX=9615 GN=RRBP1 PE=2 SV=1                                 | 0.48 | 0.38 | 83.10  | 25559518.3 | 6  | 1 | 0 | 0.13 | 1534 | 61    |
| >tr F1P704 F1P704_CANLF Zona pellucida binding protein OS=Canis lupus familiaris OX=9615 GN=ZPBP PE=3 SV=3                             | 0.57 | 0.48 | 252.70 | 25536808.4 | 4  | 2 | 0 | 7.73 | 362  | 12422 |
| >tr E2R531 E2R531_CANLF Zinc finger protein 462 OS=Canis lupus familiaris OX=9615 GN=ZNF462 PE=4 SV=3                                  | 0.57 | 0.57 | 198.60 | 25529808.8 | 6  | 2 | 1 | 0.58 | 2398 | 22062 |
| >tr A0A5F4CJI1 A0A5F4CJI1_CANLF Kelch like family member 26 OS=Canis lupus familiaris OX=9615 GN=KLHL26 PE=4 SV=1                      | 0.53 | 0.51 | 191.00 | 25251348.5 | 3  | 1 | 0 | 1.81 | 662  | 13157 |

|                                                                                                                                                     |      |      |        |            |    |   |   |       |      |       |
|-----------------------------------------------------------------------------------------------------------------------------------------------------|------|------|--------|------------|----|---|---|-------|------|-------|
| >tr F1PGF9 F1PGF9_CANLF Rho guanine nucleotide exchange factor 26 OS=Canis lupus familiaris OX=9615 GN=ARHGEF26 PE=4 SV=3                           | 1.24 | 1.20 | 296.70 | 25220664.0 | 3  | 1 | 0 | 0.84  | 594  | 22876 |
| >tr A0A5F4D3J0 A0A5F4D3J0_CANLF Dymeclin OS=Canis lupus familiaris OX=9615 GN=DYM PE=3 SV=1                                                         | 0.46 | 0.35 | 122.80 | 25111507.9 | 2  | 2 | 2 | 1.54  | 712  | 10307 |
| >tr A0A5F4BZW4 A0A5F4BZW4_CANLF Malonyl-CoA decarboxylase OS=Canis lupus familiaris OX=9615 GN=MLYCD PE=4 SV=1                                      | 0.33 | 0.27 | 199.70 | 24861305.6 | 4  | 1 | 0 | 1.30  | 461  | 4809  |
| >tr F1PM73 F1PM73_CANLF Palmitoyltransferase OS=Canis lupus familiaris OX=9615 GN=ZDHHC23 PE=3 SV=3                                                 | 0.84 | 0.82 | 42.40  | 24749138.0 | 2  | 1 | 0 | 3.98  | 427  | 22460 |
| >tr A0A5F4D6L9 A0A5F4D6L9_CANLF Sacsin molecular chaperone OS=Canis lupus familiaris OX=9615 GN=SACS PE=4 SV=1                                      | 0.59 | 0.27 | 253.90 | 24582394.0 | 7  | 3 | 0 | 0.58  | 4500 | 1444  |
| >tr A0A5F4BZB3 A0A5F4BZB3_CANLF Bassoon presynaptic cytomatrix protein OS=Canis lupus familiaris OX=9615 GN=BSN PE=4 SV=1                           | 0.35 | 0.35 | 164.40 | 24432488.5 | 4  | 1 | 0 | 0.44  | 3905 | 17263 |
| >tr F6XAM4 F6XAM4_CANLF Peptidylprolyl isomerase OS=Canis lupus familiaris OX=9615 GN=SCRN1 PE=4 SV=2                                               | 0.20 | 0.20 | 122.10 | 24306589.2 | 1  | 1 | 0 | 7.05  | 241  | 38880 |
| >tr F1PUR2 F1PUR2_CANLF CHK1 checkpoint homolog OS=Canis lupus familiaris OX=9615 GN=CHK1 PE=3 SV=3                                                 | 0.10 | 0.00 | 49.30  | 23535628.7 | 6  | 1 | 0 | 0.88  | 454  | 4485  |
| >sp Q30DN6 KDM5D_CANLF Lysine-specific demethylase 5D OS=Canis lupus familiaris OX=9615 GN=KDM5D PE=2 SV=1                                          | 0.91 | 0.85 | 187.00 | 23222062.1 | 4  | 1 | 0 | 0.26  | 1545 | 213   |
| >tr A0A5F4D9Z7 A0A5F4D9Z7_CANLF Zinc finger FYVE-type containing 19 OS=Canis lupus familiaris OX=9615 GN=ZFYE19 PE=4 SV=1                           | 0.10 | 0.07 | 93.40  | 23186453.4 | 2  | 1 | 0 | 1.53  | 392  | 13875 |
| >tr A0A5F4BQW4 A0A5F4BQW4_CANLF Zinc finger protein 654 OS=Canis lupus familiaris OX=9615 GN=ZNF654 PE=4 SV=1                                       | 0.11 | 0.10 | 203.50 | 23135482.6 | 4  | 1 | 1 | 1.03  | 1170 | 6910  |
| >tr A0A5F4CPU3 A0A5F4CPU3_CANLF SEC24 homolog D, COPII coat complex component OS=Canis lupus familiaris OX=9615 GN=SEC24D PE=3 SV=1                 | 0.15 | 0.02 | 89.30  | 23044839.7 | 24 | 1 | 0 | 0.53  | 946  | 2125  |
| >sp Q28895 NPC2_CANLF NPC intracellular cholesterol transporter 2 OS=Canis lupus familiaris OX=9615 GN=NPC2 PE=2 SV=1                               | 1.49 | 1.40 | 311.00 | 23018796.9 | 3  | 2 | 0 | 14.77 | 149  | 153   |
| >tr A0A5F4DCA4 A0A5F4DCA4_CANLF Reverse transcriptase domain-containing protein OS=Canis lupus familiaris OX=9615 PE=4 SV=1                         | 0.54 | 0.48 | 167.20 | 22970793.4 | 4  | 1 | 0 | 0.31  | 978  | 860   |
| >tr Q2A652 Q2A652_CANLF G-protein coupled receptor OS=Canis lupus familiaris OX=9615 GN=PTGDR2 PE=2 SV=1                                            | 0.10 | 0.00 | 131.20 | 22483401.3 | 3  | 1 | 0 | 1.25  | 400  | 41469 |
| >tr F1PHQ0 F1PHQ0_CANLF Clathrin heavy chain OS=Canis lupus familiaris OX=9615 GN=CLTC PE=3 SV=3                                                    | 0.16 | 0.14 | 159.40 | 22360460.1 | 2  | 1 | 1 | 0.65  | 1682 | 24646 |
| >tr Q9XSV4 Q9XSV4_CANLF CE10 protein OS=Canis lupus familiaris OX=9615 GN=ce10 PE=2 SV=1                                                            | 2.93 | 1.90 | 312.30 | 22146957.7 | 9  | 2 | 0 | 9.09  | 110  | 41542 |
| >tr A0A5F4CD39 A0A5F4CD39_CANLF Centromere protein U OS=Canis lupus familiaris OX=9615 GN=CENPU PE=3 SV=1                                           | 0.10 | 0.03 | 137.40 | 21905303.1 | 3  | 1 | 1 | 2.68  | 448  | 33164 |
| >tr J9PAZ6 J9PAZ6_CANLF Hyperpolarization activated cyclic nucleotide gated potassium channel 4 OS=Canis lupus familiaris OX=9615 GN=HCN4 PE=4 SV=2 | 0.21 | 0.17 | 103.40 | 21839012.4 | 3  | 1 | 1 | 4.91  | 530  | 19838 |
| >tr A0A5F4CCD0 A0A5F4CCD0_CANLF Cysteine rich secretory protein 2 OS=Canis lupus familiaris OX=9615 GN=CRISP2 PE=3 SV=1                             | 1.54 | 1.48 | 112.20 | 21777312.0 | 4  | 1 | 0 | 4.82  | 311  | 11017 |
| >tr Q9XSV4 Q9XSV4_CANLF CE10 protein OS=Canis lupus familiaris OX=9615 GN=ce10 PE=2 SV=1                                                            | 0.89 | 0.80 | 185.00 | 21685230.8 | 6  | 2 | 0 | 9.09  | 110  | 41542 |
| >tr A0A5F4CVL6 A0A5F4CVL6_CANLF RB transcriptional corepressor 1 OS=Canis lupus familiaris OX=9615 GN=RB1 PE=3 SV=1                                 | 0.10 | 0.02 | 34.70  | 21674741.6 | 18 | 1 | 1 | 0.43  | 927  | 1490  |

|                                                                                                                                            |      |      |        |            |    |   |   |       |      |       |
|--------------------------------------------------------------------------------------------------------------------------------------------|------|------|--------|------------|----|---|---|-------|------|-------|
| >tr A0A5F4D430 A0A5F4D430_CANLF Transcription factor AP-2 gamma OS=Canis lupus familiaris OX=9615 GN=TFAP2C PE=3 SV=1                      | 0.79 | 0.75 | 173.00 | 21557633.4 | 3  | 1 | 0 | 1.38  | 650  | 9642  |
| >tr F1PLT8 F1PLT8_CANLF Sulfhydryl oxidase OS=Canis lupus familiaris OX=9615 GN=QSOX1 PE=3 SV=3                                            | 0.11 | 0.09 | 148.90 | 21541774.5 | 2  | 1 | 0 | 2.64  | 568  | 33056 |
| >tr E2R6E0 E2R6E0_CANLF Lipocln_cytosolic_FA-bd_dom domain-containing protein OS=Canis lupus familiaris OX=9615 GN=LCNL1 PE=3 SV=2         | 1.25 | 1.19 | 126.50 | 21536887.8 | 4  | 1 | 0 | 3.01  | 299  | 1932  |
| >tr A0A5K1V0D8 A0A5K1V0D8_CANLF Sulfatase 2 OS=Canis lupus familiaris OX=9615 GN=SULF2 PE=3 SV=1                                           | 0.10 | 0.00 | 180.00 | 21470834.1 | 4  | 1 | 0 | 0.35  | 859  | 1192  |
| >tr Q30KS5 Q30KS5_CANLF Beta-defensin 129 OS=Canis lupus familiaris OX=9615 GN=DEFB129 PE=2 SV=1                                           | 1.00 | 0.96 | 279.00 | 21465779.2 | 3  | 1 | 0 | 4.22  | 166  | 41730 |
| >sp E2RED8 AP4M1_CANLF AP-4 complex subunit mu-1 OS=Canis lupus familiaris OX=9615 GN=AP4M1 PE=3 SV=2                                      | 0.30 | 0.23 | 209.40 | 21406036.1 | 5  | 1 | 0 | 0.66  | 452  | 634   |
| >tr F6PLX8 F6PLX8_CANLF Beta-defensin OS=Canis lupus familiaris OX=9615 GN=DEFB118 PE=3 SV=1                                               | 0.31 | 0.27 | 235.50 | 21401548.6 | 3  | 1 | 0 | 5.85  | 171  | 34287 |
| >sp Q8HYV8 ASB17_CANLF Ankyrin repeat and SOCS box protein 17 OS=Canis lupus familiaris OX=9615 GN=ASB17 PE=2 SV=1                         | 0.10 | 0.00 | 172.90 | 21245230.7 | 4  | 1 | 0 | 1.02  | 295  | 404   |
| >tr A0A5F4DDS5 A0A5F4DDS5_CANLF CD86 molecule OS=Canis lupus familiaris OX=9615 GN=CD86 PE=4 SV=1                                          | 0.49 | 0.47 | 164.60 | 20983189.6 | 2  | 1 | 0 | 2.22  | 315  | 17545 |
| >tr A0A5F4CQW0 A0A5F4CQW0_CANLF Polybromo 1 OS=Canis lupus familiaris OX=9615 GN=PBRM1 PE=4 SV=1                                           | 0.21 | 0.19 | 140.20 | 20883191.9 | 2  | 1 | 0 | 0.79  | 1510 | 2204  |
| >tr A0A5F4DCB2 A0A5F4DCB2_CANLF NOP2/Sun RNA methyltransferase 5 OS=Canis lupus familiaris OX=9615 GN=NSUN5 PE=3 SV=1                      | 0.10 | 0.05 | 45.70  | 20836011.4 | 1  | 1 | 0 | 1.49  | 469  | 2010  |
| >tr E2RCT1 E2RCT1_CANLF WAP domain-containing protein OS=Canis lupus familiaris OX=9615 PE=4 SV=2                                          | 0.27 | 0.21 | 154.10 | 20742543.1 | 4  | 1 | 0 | 8.62  | 116  | 21717 |
| >tr A0A5F4C0S7 A0A5F4C0S7_CANLF HEAT repeat containing 5A OS=Canis lupus familiaris OX=9615 GN=HEATR5A PE=3 SV=1                           | 0.10 | 0.02 | 93.80  | 20628990.4 | 15 | 1 | 0 | 0.25  | 1995 | 1753  |
| >tr A0A5F4CNP4 A0A5F4CNP4_CANLF ADP ribosylation factor GTPase activating protein 3 OS=Canis lupus familiaris OX=9615 GN=ARFGAP3 PE=4 SV=1 | 0.41 | 0.37 | 183.20 | 20553248.6 | 3  | 1 | 0 | 1.12  | 714  | 964   |
| >tr E2RE16 E2RE16_CANLF Non-specific serine/threonine protein kinase OS=Canis lupus familiaris OX=9615 GN=PAK4 PE=4 SV=1                   | 0.29 | 0.12 | 101.60 | 20491308.1 | 10 | 1 | 0 | 0.84  | 592  | 12735 |
| >tr A0A5F4CCD0 A0A5F4CCD0_CANLF Cysteine rich secretory protein 2 OS=Canis lupus familiaris OX=9615 GN=CRISP2 PE=3 SV=1                    | 1.05 | 1.01 | 160.70 | 20009199.8 | 3  | 1 | 0 | 4.82  | 311  | 11017 |
| >tr Q9XSV4 Q9XSV4_CANLF CE10 protein OS=Canis lupus familiaris OX=9615 GN=ce10 PE=2 SV=1                                                   | 1.38 | 1.12 | 233.10 | 19989969.8 | 6  | 3 | 0 | 14.55 | 110  | 41542 |
| >sp Q5QQ50 XYLT2_CANLF Xylosyltransferase 2 OS=Canis lupus familiaris OX=9615 GN=XYLT2 PE=2 SV=1                                           | 0.20 | 0.18 | 99.80  | 19874604.6 | 2  | 1 | 0 | 0.35  | 865  | 388   |
| >tr F1PBJ1 F1PBJ1_CANLF Methylcytosine dioxygenase TET OS=Canis lupus familiaris OX=9615 GN=TET3 PE=3 SV=2                                 | 0.16 | 0.02 | 78.50  | 19810784.1 | 8  | 1 | 0 | 0.28  | 1795 | 1529  |
| >tr A0A5F4C840 A0A5F4C840_CANLF KIAA1109 OS=Canis lupus familiaris OX=9615 GN=KIAA1109 PE=4 SV=1                                           | 0.47 | 0.46 | 176.10 | 19808731.3 | 2  | 1 | 0 | 0.16  | 5041 | 21640 |
| >tr A0A5F4BXD8 A0A5F4BXD8_CANLF Matrix metalloproteinase 16 OS=Canis lupus familiaris OX=9615 GN=MMP16 PE=3 SV=1                           | 0.26 | 0.26 | 169.00 | 19760675.6 | 1  | 1 | 0 | 2.65  | 566  | 6476  |
| >sp O46607 GPX5_CANLF Epididymal secretory glutathione peroxidase OS=Canis lupus familiaris OX=9615 GN=GPX5 PE=2 SV=1                      | 0.73 | 0.71 | 76.00  | 19747744.3 | 2  | 1 | 0 | 6.79  | 221  | 564   |

|                                                                                                                                      |       |      |        |            |    |    |   |       |      |       |
|--------------------------------------------------------------------------------------------------------------------------------------|-------|------|--------|------------|----|----|---|-------|------|-------|
| >sp P01002 IPSG_CANLF Double-headed protease inhibitor, submandibular gland OS=Canis lupus familiaris OX=9615 PE=1 SV=1              | 1.05  | 1.03 | 209.10 | 19708370.2 | 2  | 1  | 0 | 7.83  | 115  | 434   |
| >tr E2RRP1 E2RRP1_CANLF Butyryl-CoA dehydrogenase OS=Canis lupus familiaris OX=9615 GN=IVD PE=3 SV=2                                 | 0.14  | 0.10 | 80.90  | 19542226.8 | 3  | 1  | 0 | 3.99  | 426  | 10739 |
| >tr A0A5F4CCE2 A0A5F4CCE2_CANLF Pappalysin 2 OS=Canis lupus familiaris OX=9615 GN=PAPPA2 PE=3 SV=1                                   | 1.63  | 1.63 | 155.30 | 19488411.9 | 1  | 1  | 0 | 0.81  | 1722 | 20443 |
| >tr A0A5F4C2N8 A0A5F4C2N8_CANLF Sperm protamine P1 OS=Canis lupus familiaris OX=9615 PE=3 SV=1                                       | 0.75  | 0.71 | 219.00 | 19469318.1 | 3  | 1  | 0 | 10.00 | 50   | 7114  |
| >tr E2R856 E2R856_CANLF Myeloid derived growth factor OS=Canis lupus familiaris OX=9615 GN=MYDGF PE=4 SV=3                           | 0.53  | 0.47 | 24.40  | 19417306.0 | 4  | 1  | 0 | 3.47  | 173  | 26349 |
| >tr A0A5F4CTQ6 A0A5F4CTQ6_CANLF SLC9A3 regulator 2 OS=Canis lupus familiaris OX=9615 GN=SLC9A3R2 PE=4 SV=1                           | 0.53  | 0.47 | 24.40  | 19417306.0 | 4  | 1  | 0 | 1.90  | 315  | 18010 |
| >tr E2RKA1 E2RKA1_CANLF Tyrosine-protein kinase receptor OS=Canis lupus familiaris OX=9615 GN=NTRK2 PE=3 SV=2                        | 0.53  | 0.47 | 24.40  | 19417306.0 | 4  | 1  | 0 | 0.73  | 822  | 20603 |
| >tr F1PEA8 F1PEA8_CANLF Phosphatidylinositol-3,4,5-trisphosphate 5-phosphatase OS=Canis lupus familiaris OX=9615 GN=INPP5D PE=3 SV=3 | 0.53  | 0.47 | 24.40  | 19417306.0 | 4  | 1  | 0 | 0.43  | 1399 | 17627 |
| >tr E2R079 E2R079_CANLF Serpin family B member 2 OS=Canis lupus familiaris OX=9615 GN=SERPINB2 PE=3 SV=2                             | 0.20  | 0.20 | 150.10 | 19354015.4 | 1  | 1  | 0 | 1.92  | 416  | 21385 |
| >tr F1PR54 F1PR54_CANLF Lactotransferrin OS=Canis lupus familiaris OX=9615 GN=LTF PE=3 SV=1                                          | 15.13 | 3.21 | 309.60 | 19326649.7 | 43 | 9  | 0 | 14.41 | 708  | 40436 |
| >tr A0A5F4CHN1 A0A5F4CHN1_CANLF Serine/arginine repetitive matrix 2 OS=Canis lupus familiaris OX=9615 GN=SRRM2 PE=4 SV=1             | 0.66  | 0.66 | 197.10 | 19302627.6 | 1  | 1  | 0 | 0.16  | 2564 | 3180  |
| >tr J9P0B4 J9P0B4_CANLF Tudor domain containing 15 OS=Canis lupus familiaris OX=9615 GN=TDRD15 PE=4 SV=2                             | 0.10  | 0.01 | 151.50 | 19087152.4 | 9  | 1  | 0 | 0.57  | 2105 | 4188  |
| >tr A0A5F4CIW5 A0A5F4CIW5_CANLF Hexokinase OS=Canis lupus familiaris OX=9615 GN=HK1 PE=3 SV=1                                        | 0.70  | 0.66 | 153.20 | 18902666.7 | 3  | 1  | 0 | 0.48  | 839  | 1598  |
| >tr Q9XSV4 Q9XSV4_CANLF CE10 protein OS=Canis lupus familiaris OX=9615 GN=ce10 PE=2 SV=1                                             | 2.04  | 1.77 | 213.50 | 18885638.8 | 7  | 3  | 0 | 14.55 | 110  | 41542 |
| >sp Q30DN6 KDM5D_CANLF Lysine-specific demethylase 5D OS=Canis lupus familiaris OX=9615 GN=KDM5D PE=2 SV=1                           | 0.75  | 0.71 | 167.90 | 18831626.3 | 3  | 1  | 0 | 0.26  | 1545 | 213   |
| >tr E2R5M1 E2R5M1_CANLF Filamin binding LIM protein 1 OS=Canis lupus familiaris OX=9615 GN=FBLIM1 PE=4 SV=3                          | 0.17  | 0.17 | 11.10  | 18544122.8 | 2  | 1  | 1 | 4.90  | 388  | 12864 |
| >tr E2RLU6 E2RLU6_CANLF G-protein coupled receptor 139 OS=Canis lupus familiaris OX=9615 GN=GPR139 PE=2 SV=1                         | 0.35  | 0.35 | 52.40  | 18492944.3 | 1  | 1  | 0 | 6.82  | 352  | 41386 |
| >tr J9NTK2 J9NTK2_CANLF J domain-containing protein OS=Canis lupus familiaris OX=9615 GN=DNAJC12 PE=4 SV=2                           | 0.39  | 0.35 | 152.50 | 18410976.8 | 3  | 1  | 0 | 4.72  | 106  | 2310  |
| >sp P49822 ALBU_CANLF Albumin OS=Canis lupus familiaris OX=9615 GN=ALB PE=1 SV=3                                                     | 13.42 | 2.87 | 336.30 | 18325290.9 | 58 | 12 | 1 | 23.85 | 608  | 490   |
| >tr A0A5F4DIQ5 A0A5F4DIQ5_CANLF Helicase with zinc finger 2 OS=Canis lupus familiaris OX=9615 GN=HELZ2 PE=4 SV=1                     | 0.48  | 0.43 | 165.00 | 18310220.9 | 4  | 2  | 0 | 0.85  | 2929 | 1253  |
| >tr A0A5F4C7W7 A0A5F4C7W7_CANLF Phosphatidylinositol-4,5-bisphosphate 3-kinase OS=Canis lupus familiaris OX=9615 GN=PIK3CD PE=3 SV=1 | 0.47  | 0.41 | 22.60  | 18206838.5 | 4  | 1  | 0 | 0.57  | 1051 | 18533 |
| >tr J9P0B4 J9P0B4_CANLF Tudor domain containing 15 OS=Canis lupus familiaris OX=9615 GN=TDRD15 PE=4 SV=2                             | 0.69  | 0.59 | 215.90 | 18195964.5 | 6  | 1  | 0 | 0.57  | 2105 | 4188  |

|                                                                                                                                      |      |      |        |            |   |   |   |       |      |       |
|--------------------------------------------------------------------------------------------------------------------------------------|------|------|--------|------------|---|---|---|-------|------|-------|
| >tr J9NS28 J9NS28_CANLF RBR-type E3 ubiquitin transferase OS=Canis lupus familiaris OX=9615 GN=ANKIB1 PE=4 SV=2                      | 0.10 | 0.06 | 47.20  | 18191412.1 | 1 | 1 | 0 | 2.33  | 988  | 26345 |
| >tr A0A5F4BZ61 A0A5F4BZ61_CANLF G_PROTEIN_RECEP_F1_2 domain-containing protein OS=Canis lupus familiaris OX=9615 GN=OR5D13 PE=4 SV=1 | 0.10 | 0.00 | 57.10  | 18121586.8 | 2 | 1 | 0 | 1.70  | 294  | 37537 |
| >tr A0A5F4BUA6 A0A5F4BUA6_CANLF NCK associated protein 5 OS=Canis lupus familiaris OX=9615 GN=NCKAP5 PE=4 SV=1                       | 0.13 | 0.14 | 84.30  | 18095631.5 | 1 | 1 | 0 | 0.66  | 1977 | 5785  |
| >sp F1PRN2 MYO1D_CANLF Unconventional myosin-IId OS=Canis lupus familiaris OX=9615 GN=MYO1D PE=1 SV=2                                | 0.82 | 0.74 | 171.10 | 18091275.2 | 5 | 1 | 0 | 0.30  | 1006 | 763   |
| >sp P23685 NAC1_CANLF Sodium/calcium exchanger 1 OS=Canis lupus familiaris OX=9615 GN=SLC8A1 PE=1 SV=1                               | 0.13 | 0.09 | 151.40 | 18090485.6 | 3 | 1 | 0 | 1.03  | 970  | 764   |
| >tr E2RCT1 E2RCT1_CANLF WAP domain-containing protein OS=Canis lupus familiaris OX=9615 PE=4 SV=2                                    | 0.43 | 0.40 | 186.10 | 17984233.1 | 3 | 1 | 0 | 14.66 | 116  | 21717 |
| >tr E2R6E0 E2R6E0_CANLF Lipocln_cytosolic_FA-bd_dom domain-containing protein OS=Canis lupus familiaris OX=9615 GN=LCNL1 PE=3 SV=2   | 2.36 | 1.74 | 95.80  | 17961992.8 | 3 | 2 | 0 | 7.69  | 299  | 1932  |
| >tr E2RIH1 E2RIH1_CANLF DOP1 leucine zipper like protein B OS=Canis lupus familiaris OX=9615 GN=DOP1B PE=3 SV=3                      | 1.18 | 1.18 | 47.30  | 17933746.1 | 1 | 1 | 0 | 1.20  | 2259 | 7751  |
| >tr A0A5F4C7P9 A0A5F4C7P9_CANLF Beta-2-microglobulin OS=Canis lupus familiaris OX=9615 GN=B2M PE=4 SV=1                              | 0.40 | 0.37 | 107.20 | 17663412.7 | 3 | 1 | 0 | 12.15 | 107  | 10611 |
| >tr E2RH77 E2RH77_CANLF Ferric oxidoreductase domain-containing protein OS=Canis lupus familiaris OX=9615 GN=STEAP1 PE=4 SV=2        | 0.10 | 0.02 | 86.20  | 17584984.2 | 1 | 1 | 0 | 2.18  | 596  | 22587 |
| >tr F1P8J6 F1P8J6_CANLF RNA helicase OS=Canis lupus familiaris OX=9615 GN=DDX55 PE=3 SV=3                                            | 0.10 | 0.06 | 116.00 | 17441535.0 | 1 | 1 | 0 | 1.58  | 568  | 8934  |
| >sp Q6AW47 EST5A_CANLF Carboxylesterase 5A OS=Canis lupus familiaris OX=9615 GN=CES5A PE=2 SV=1                                      | 0.42 | 0.38 | 237.10 | 17411428.4 | 3 | 1 | 0 | 0.87  | 575  | 629   |
| >sp Q9TU53 CUBN_CANLF Cubilin OS=Canis lupus familiaris OX=9615 GN=CUBN PE=1 SV=1                                                    | 0.10 | 0.05 | 188.70 | 17410876.3 | 3 | 1 | 0 | 0.08  | 3620 | 406   |
| >tr Q30KS5 Q30KS5_CANLF Beta-defensin 129 OS=Canis lupus familiaris OX=9615 GN=DEFB129 PE=2 SV=1                                     | 3.20 | 3.18 | 273.50 | 17335003.1 | 2 | 1 | 0 | 4.22  | 166  | 41730 |
| >tr F1Q064 F1Q064_CANLF WSC domain containing 2 OS=Canis lupus familiaris OX=9615 GN=WSCD2 PE=3 SV=2                                 | 1.20 | 0.81 | 197.70 | 17328528.2 | 3 | 2 | 0 | 2.66  | 564  | 5749  |
| >tr cc E2RSV7_CANLF Nuclear pore complex protein Nup93 OS=Canis lupus familiaris OX=9615 GN=NUP93 PE=3 SV=2                          | 0.43 | 0.36 | 151.30 | 17288988.2 | 5 | 2 | 1 | 2.16  | 925  | 13752 |
| >tr A0A5F4BTW9 A0A5F4BTW9_CANLF Adhesion G protein-coupled receptor L2 OS=Canis lupus familiaris OX=9615 GN=ADGRL2 PE=4 SV=1         | 0.19 | 0.19 | 128.40 | 17274808.2 | 1 | 1 | 0 | 0.47  | 1474 | 2238  |
| >tr A0A5F4CTH2 A0A5F4CTH2_CANLF FA complementation group I OS=Canis lupus familiaris OX=9615 GN=FANCI PE=4 SV=1                      | 0.35 | 0.35 | 120.80 | 17259280.1 | 1 | 1 | 0 | 0.85  | 1404 | 5579  |
| >tr F1P6B8 F1P6B8_CANLF Intraflagellar transport protein 57 homolog OS=Canis lupus familiaris OX=9615 GN=IFT57 PE=3 SV=3             | 0.10 | 0.03 | 197.60 | 17239961.0 | 3 | 1 | 0 | 0.62  | 482  | 4757  |
| >sp Q7YRB7 AOFB_CANLF Amine oxidase [flavin-containing] B OS=Canis lupus familiaris OX=9615 GN=MAOB PE=2 SV=3                        | 0.45 | 0.45 | 128.50 | 17226955.8 | 1 | 1 | 0 | 0.77  | 520  | 646   |
| >tr E2RDS7 E2RDS7_CANLF Zinc finger protein 398 OS=Canis lupus familiaris OX=9615 GN=ZNF398 PE=4 SV=2                                | 0.16 | 0.12 | 157.40 | 17209915.4 | 3 | 1 | 0 | 1.40  | 642  | 44996 |
| >sp Q9TU69 GHR_CANLF Growth hormone receptor OS=Canis lupus familiaris OX=9615 GN=GHR PE=2 SV=1                                      | 0.12 | 0.10 | 140.50 | 17128942.5 | 2 | 1 | 0 | 1.72  | 638  | 541   |

|                                                                                                                                      |      |      |        |            |    |   |   |      |      |       |
|--------------------------------------------------------------------------------------------------------------------------------------|------|------|--------|------------|----|---|---|------|------|-------|
| >tr A0A5F4C546 A0A5F4C546_CANLF Solute carrier family 25 member 17 OS=Canis lupus familiaris OX=9615 GN=SLC25A17 PE=3 SV=1           | 0.38 | 0.38 | 97.60  | 17096286.3 | 1  | 1 | 0 | 5.83 | 223  | 39398 |
| >tr A0A5F4DD58 A0A5F4DD58_CANLF Phosphoinositide phospholipase C OS=Canis lupus familiaris OX=9615 GN=PLCD3 PE=4 SV=1                | 0.42 | 0.36 | 144.70 | 16940464.9 | 5  | 2 | 0 | 0.94 | 741  | 3088  |
| >tr E2QUM4 E2QUM4_CANLF Pseudopodium enriched atypical kinase 1 OS=Canis lupus familiaris OX=9615 GN=PEAK1 PE=4 SV=3                 | 0.52 | 0.52 | 126.80 | 16893351.7 | 3  | 2 | 2 | 1.73 | 1674 | 5482  |
| >tr F1PTB2 F1PTB2_CANLF Interleukin 6 signal transducer OS=Canis lupus familiaris OX=9615 GN=IL6ST PE=3 SV=3                         | 0.44 | 0.42 | 174.90 | 16803218.6 | 2  | 1 | 0 | 0.35 | 867  | 4860  |
| >sp Q5TJE1 DAXX_CANLF Death domain-associated protein 6 OS=Canis lupus familiaris OX=9615 GN=DAXX PE=3 SV=1                          | 0.95 | 0.91 | 215.20 | 16793805.3 | 3  | 1 | 0 | 0.54 | 737  | 429   |
| >tr E2RSW3 E2RSW3_CANLF Ferric chelate reductase 1 OS=Canis lupus familiaris OX=9615 GN=FRRS1 PE=3 SV=3                              | 0.10 | 0.02 | 63.70  | 16726431.7 | 2  | 1 | 0 | 0.66 | 605  | 40434 |
| >tr A0A5F4BQE1 A0A5F4BQE1_CANLF Vacuolar fusion protein MON1 homolog OS=Canis lupus familiaris OX=9615 GN=MON1B PE=3 SV=1            | 0.67 | 0.67 | 145.60 | 16642869.2 | 1  | 1 | 0 | 2.32 | 561  | 9974  |
| >tr Q9XSV4 Q9XSV4_CANLF CE10 protein OS=Canis lupus familiaris OX=9615 GN=ce10 PE=2 SV=1                                             | 4.37 | 2.16 | 334.50 | 16557162.0 | 53 | 2 | 0 | 9.09 | 110  | 41542 |
| >tr F1PGL2 F1PGL2_CANLF RNA helicase OS=Canis lupus familiaris OX=9615 GN=DHX16 PE=4 SV=2                                            | 0.15 | 0.13 | 40.10  | 16524257.0 | 2  | 1 | 0 | 1.73 | 1042 | 43089 |
| >tr J9P4Q5 J9P4Q5_CANLF HECT-type E3 ubiquitin transferase OS=Canis lupus familiaris OX=9615 GN=HECW1 PE=4 SV=2                      | 0.10 | 0.03 | 105.10 | 16497583.2 | 1  | 1 | 0 | 1.26 | 1587 | 3937  |
| >tr A0A5F4D8I6 A0A5F4D8I6_CANLF Phospholipase A2 receptor 1 OS=Canis lupus familiaris OX=9615 GN=PLA2R1 PE=4 SV=1                    | 0.53 | 0.41 | 121.60 | 16419922.9 | 7  | 1 | 0 | 0.50 | 1394 | 6796  |
| >sp Q9TU69 GHR_CANLF Growth hormone receptor OS=Canis lupus familiaris OX=9615 GN=GHR PE=2 SV=1                                      | 0.21 | 0.19 | 112.60 | 16417944.7 | 2  | 1 | 0 | 1.72 | 638  | 541   |
| >sp Q9XSU7 RL27_CANLF 60S ribosomal protein L27 OS=Canis lupus familiaris OX=9615 GN=RPL27 PE=2 SV=3                                 | 0.10 | 0.00 | 52.70  | 16415776.7 | 38 | 1 | 0 | 3.68 | 136  | 314   |
| >tr J9NZH4 J9NZH4_CANLF NTR domain-containing protein OS=Canis lupus familiaris OX=9615 GN=LOC102154527 PE=3 SV=2                    | 0.27 | 0.25 | 188.50 | 16404036.1 | 2  | 1 | 0 | 8.14 | 221  | 39505 |
| >tr F6XCF8 F6XCF8_CANLF Vacuolar protein sorting-associated protein 54 OS=Canis lupus familiaris OX=9615 GN=VPS54 PE=3 SV=1          | 0.10 | 0.05 | 34.80  | 16350850.2 | 3  | 1 | 0 | 2.38 | 965  | 34050 |
| >tr A0A5F4D430 A0A5F4D430_CANLF Transcription factor AP-2 gamma OS=Canis lupus familiaris OX=9615 GN=TFAP2C PE=3 SV=1                | 0.34 | 0.34 | 165.20 | 16336580.4 | 1  | 1 | 0 | 1.38 | 650  | 9642  |
| >tr A0A5F4C7E7 A0A5F4C7E7_CANLF 3-beta-hydroxysterol Delta (14)-reductase OS=Canis lupus familiaris OX=9615 GN=LBR PE=3 SV=1         | 0.10 | 0.06 | 140.90 | 16271171.0 | 1  | 1 | 0 | 1.04 | 576  | 1034  |
| >tr A0A5F4DKM7 A0A5F4DKM7_CANLF Terminal uridylyl transferase 4 OS=Canis lupus familiaris OX=9615 GN=TUT4 PE=4 SV=1                  | 0.10 | 0.05 | 77.60  | 16269702.7 | 3  | 1 | 0 | 0.19 | 1611 | 941   |
| >tr A0A5F4CJI0 A0A5F4CJI0_CANLF Folate_rec domain-containing protein OS=Canis lupus familiaris OX=9615 GN=FOLR1 PE=3 SV=1            | 0.35 | 0.33 | 203.80 | 16184156.6 | 2  | 1 | 0 | 3.14 | 255  | 10075 |
| >sp Q5TJE1 DAXX_CANLF Death domain-associated protein 6 OS=Canis lupus familiaris OX=9615 GN=DAXX PE=3 SV=1                          | 0.49 | 0.47 | 196.80 | 16176258.2 | 3  | 1 | 0 | 0.54 | 737  | 429   |
| >tr A0A5F4DJM5 A0A5F4DJM5_CANLF Tyrosine-protein phosphatase non-receptor type OS=Canis lupus familiaris OX=9615 GN=PTPN21 PE=3 SV=1 | 0.32 | 0.28 | 165.80 | 16149442.2 | 3  | 1 | 0 | 0.55 | 1096 | 5460  |
| >tr A0A5F4D9Z7 A0A5F4D9Z7_CANLF Zinc finger FYVE-type containing 19 OS=Canis lupus familiaris OX=9615 GN=ZFYE19 PE=4 SV=1            | 0.74 | 0.75 | 131.70 | 16130682.1 | 1  | 1 | 0 | 1.53 | 392  | 13875 |

|                                                                                                                                      |      |      |        |            |    |   |   |      |      |       |
|--------------------------------------------------------------------------------------------------------------------------------------|------|------|--------|------------|----|---|---|------|------|-------|
| >tr A0A5F4D6G2 A0A5F4D6G2_CANLF SMG7 nonsense mediated mRNA decay factor OS=Canis lupus familiaris OX=9615 GN=SMG7 PE=4 SV=1         | 0.47 | 0.45 | 267.80 | 16124928.9 | 2  | 1 | 0 | 0.43 | 1175 | 2075  |
| >tr A0A5F4D2W3 A0A5F4D2W3_CANLF Growth factor receptor bound protein 2 OS=Canis lupus familiaris OX=9615 GN=GRB2 PE=4 SV=1           | 0.15 | 0.13 | 123.40 | 15860300.0 | 2  | 2 | 2 | 4.95 | 222  | 13178 |
| >tr A0A5F4BSQ1 A0A5F4BSQ1_CANLF Dystonin OS=Canis lupus familiaris OX=9615 GN=DST PE=4 SV=1                                          | 0.17 | 0.18 | 114.10 | 15848542.5 | 1  | 1 | 0 | 0.17 | 7514 | 9739  |
| >tr A0A5F4CK18 A0A5F4CK18_CANLF Transcription elongation factor spt6 OS=Canis lupus familiaris OX=9615 GN=SUPT6H PE=3 SV=1           | 0.10 | 0.08 | 153.00 | 15837347.8 | 1  | 1 | 0 | 0.44 | 1602 | 3373  |
| >tr E2RIK1 E2RIK1_CANLF Phosphatidylinositol-4-phosphate 3-kinase OS=Canis lupus familiaris OX=9615 GN=PIK3C2G PE=3 SV=3             | 0.57 | 0.53 | 38.70  | 15731759.4 | 3  | 1 | 0 | 0.42 | 1445 | 5924  |
| >tr F1PGF9 F1PGF9_CANLF Rho guanine nucleotide exchange factor 26 OS=Canis lupus familiaris OX=9615 GN=ARHGEF26 PE=4 SV=3            | 0.62 | 0.60 | 275.30 | 15678307.1 | 2  | 1 | 0 | 0.84 | 594  | 22876 |
| >sp P49822 ALBU_CANLF Albumin OS=Canis lupus familiaris OX=9615 GN=ALB PE=1 SV=3                                                     | 0.14 | 0.14 | 69.70  | 15672286.1 | 1  | 1 | 0 | 1.97 | 608  | 490   |
| >tr A0A5F4D952 A0A5F4D952_CANLF FAT atypical cadherin 1 OS=Canis lupus familiaris OX=9615 GN=FAT1 PE=4 SV=1                          | 0.42 | 0.43 | 163.90 | 15585287.4 | 1  | 1 | 0 | 0.26 | 4614 | 14224 |
| >tr E2RHG5 E2RHG5_CANLF Nudix hydrolase 3 OS=Canis lupus familiaris OX=9615 GN=NUDT3 PE=4 SV=1                                       | 0.45 | 0.39 | 136.00 | 15525663.2 | 4  | 1 | 0 | 6.40 | 172  | 21894 |
| >tr A0A5F4CLU1 A0A5F4CLU1_CANLF Superoxide dismutase [Cu-Zn] OS=Canis lupus familiaris OX=9615 GN=SOD1 PE=3 SV=1                     | 0.95 | 0.91 | 185.70 | 15423358.4 | 3  | 1 | 0 | 7.09 | 141  | 25417 |
| >tr F1PVA2 F1PVA2_CANLF Adhesion G protein-coupled receptor V1 OS=Canis lupus familiaris OX=9615 GN=ADGRV1 PE=4 SV=3                 | 0.32 | 0.33 | 173.40 | 15282101.3 | 1  | 1 | 0 | 0.08 | 6300 | 19804 |
| >tr F1PBJ1 F1PBJ1_CANLF Methylcytosine dioxygenase TET OS=Canis lupus familiaris OX=9615 GN=TET3 PE=3 SV=2                           | 0.10 | 0.00 | 74.20  | 15265630.4 | 10 | 1 | 0 | 0.28 | 1795 | 1529  |
| >tr A0A5F4CI67 A0A5F4CI67_CANLF Mannanase OS=Canis lupus familiaris OX=9615 GN=MANBA PE=4 SV=1                                       | 0.64 | 0.62 | 197.50 | 15157777.5 | 2  | 1 | 0 | 1.45 | 828  | 37800 |
| >tr A0A5F4CQZ1 A0A5F4CQZ1_CANLF LIM domain 7 OS=Canis lupus familiaris OX=9615 GN=LMO7 PE=4 SV=1                                     | 0.10 | 0.00 | 89.10  | 15154154.7 | 4  | 1 | 1 | 0.28 | 1806 | 10523 |
| >sp O46607 GPX5_CANLF Epididymal secretory glutathione peroxidase OS=Canis lupus familiaris OX=9615 GN=GPX5 PE=2 SV=1                | 1.01 | 0.85 | 233.10 | 15096457.5 | 4  | 2 | 0 | 8.60 | 221  | 564   |
| >tr E2RHP1 E2RHP1_CANLF T cell activation inhibitor, mitochondrial OS=Canis lupus familiaris OX=9615 GN=TCAIM PE=4 SV=1              | 0.24 | 0.20 | 84.40  | 14970549.4 | 3  | 1 | 0 | 2.01 | 497  | 25418 |
| >tr E2QUV3 E2QUV3_CANLF Alpha-2-HS-glycoprotein OS=Canis lupus familiaris OX=9615 GN=AHSG PE=4 SV=2                                  | 0.70 | 0.66 | 59.90  | 14914548.0 | 3  | 1 | 0 | 5.48 | 365  | 20747 |
| >tr A0A5F4DKA1 A0A5F4DKA1_CANLF Zinc finger protein 335 OS=Canis lupus familiaris OX=9615 GN=ZNF335 PE=4 SV=1                        | 0.14 | 0.12 | 172.80 | 14857466.3 | 3  | 2 | 0 | 1.09 | 1380 | 32203 |
| >tr F6PLX8 F6PLX8_CANLF Beta-defensin OS=Canis lupus familiaris OX=9615 GN=DEFB118 PE=3 SV=1                                         | 0.10 | 0.03 | 199.60 | 14835226.8 | 2  | 1 | 0 | 5.85 | 171  | 34287 |
| >tr E2RE16 E2RE16_CANLF Non-specific serine/threonine protein kinase OS=Canis lupus familiaris OX=9615 GN=PAK4 PE=4 SV=1             | 0.10 | 0.00 | 57.00  | 14718612.4 | 34 | 1 | 0 | 0.84 | 592  | 12735 |
| >tr A0A5F4BT89 A0A5F4BT89_CANLF Olfactory receptor OS=Canis lupus familiaris OX=9615 GN=OR5W6 PE=3 SV=1                              | 0.10 | 0.02 | 111.40 | 14625569.8 | 1  | 1 | 1 | 6.95 | 302  | 29923 |
| >tr F1PFZ5 F1PFZ5_CANLF Milk fat globule EGF and factor V/VIII domain containing OS=Canis lupus familiaris OX=9615 GN=MFG8 PE=4 SV=3 | 0.82 | 0.80 | 236.70 | 14614665.7 | 3  | 2 | 1 | 8.88 | 428  | 7079  |

|                                                                                                                                                                |      |      |        |            |    |   |   |       |      |       |
|----------------------------------------------------------------------------------------------------------------------------------------------------------------|------|------|--------|------------|----|---|---|-------|------|-------|
| >tr A0A5F4D4R7 A0A5F4D4R7_CANLF TIAM Rac1 associated GEF 1 OS=Canis lupus familiaris OX=9615 GN=TIAM1 PE=4 SV=1                                                | 0.35 | 0.33 | 82.90  | 14458396.2 | 2  | 1 | 0 | 1.06  | 1601 | 3447  |
| >tr F1PGX9 F1PGX9_CANLF Solute carrier family 2 member 13 OS=Canis lupus familiaris OX=9615 GN=SLC2A13 PE=3 SV=3                                               | 0.13 | 0.13 | 157.40 | 14454989.0 | 1  | 1 | 0 | 0.96  | 624  | 37617 |
| >tr J9P199 J9P199_CANLF tRNA (guanine(37)-N1)-methyltransferase OS=Canis lupus familiaris OX=9615 GN=TRMT5 PE=3 SV=2                                           | 0.16 | 0.14 | 130.30 | 14347364.2 | 2  | 1 | 0 | 2.02  | 495  | 29429 |
| >tr A0A5F4D9S5 A0A5F4D9S5_CANLF Hyaluronoglucosaminidase OS=Canis lupus familiaris OX=9615 GN=CEMIP PE=3 SV=1                                                  | 1.79 | 1.77 | 182.50 | 14236079.5 | 2  | 1 | 0 | 0.24  | 1684 | 9775  |
| >tr A0A5F4D430 A0A5F4D430_CANLF Transcription factor AP-2 gamma OS=Canis lupus familiaris OX=9615 GN=TFAP2C PE=3 SV=1                                          | 1.07 | 1.05 | 175.10 | 14213859.7 | 2  | 1 | 0 | 1.38  | 650  | 9642  |
| >tr E2RT65 E2RT65_CANLF Phosphoglycerate mutase OS=Canis lupus familiaris OX=9615 GN=PI4K2A PE=3 SV=2                                                          | 0.56 | 0.52 | 216.80 | 14213607.7 | 3  | 1 | 0 | 4.33  | 254  | 15155 |
| >sp Q2PQH8 GDE_CANLF Glycogen debranching enzyme OS=Canis lupus familiaris OX=9615 GN=AGL PE=2 SV=1                                                            | 0.36 | 0.36 | 102.20 | 14211650.4 | 1  | 1 | 0 | 0.13  | 1533 | 23    |
| >tr A0A5F4DCA4 A0A5F4DCA4_CANLF Reverse transcriptase domain-containing protein OS=Canis lupus familiaris OX=9615 PE=4 SV=1                                    | 0.47 | 0.43 | 157.00 | 14021031.5 | 3  | 1 | 0 | 0.31  | 978  | 860   |
| >tr A0A5F4CGB9 A0A5F4CGB9_CANLF Decapping mRNA 1B OS=Canis lupus familiaris OX=9615 GN=DCP1B PE=3 SV=1                                                         | 0.10 | 0.03 | 74.50  | 13938089.4 | 4  | 1 | 0 | 0.36  | 1115 | 990   |
| >sp Q28894 WFDC2_CANLF WAP four-disulfide core domain protein 2 OS=Canis lupus familiaris OX=9615 GN=WFDC2 PE=2 SV=1                                           | 3.64 | 3.62 | 426.70 | 13881147.4 | 2  | 1 | 0 | 6.45  | 124  | 53    |
| >tr E2R6E0 E2R6E0_CANLF Lipocln_cytosolic_FA-bd_dom domain-containing protein OS=Canis lupus familiaris OX=9615 GN=LCNL1 PE=3 SV=2                             | 1.64 | 1.60 | 207.90 | 13803649.9 | 3  | 1 | 0 | 3.68  | 299  | 1932  |
| >sp Q8WMU5 FZD6_CANLF Frizzled-6 OS=Canis lupus familiaris OX=9615 GN=FZD6 PE=2 SV=1                                                                           | 0.45 | 0.43 | 137.10 | 13681349.2 | 2  | 1 | 0 | 0.42  | 712  | 593   |
| >tr A0A5F4CCD0 A0A5F4CCD0_CANLF Cysteine rich secretory protein 2 OS=Canis lupus familiaris OX=9615 GN=CRISP2 PE=3 SV=1                                        | 0.74 | 0.72 | 107.80 | 13629738.6 | 2  | 1 | 0 | 4.82  | 311  | 11017 |
| >tr J9NYC7 J9NYC7_CANLF Dynein axonemal heavy chain 12 OS=Canis lupus familiaris OX=9615 GN=DNAH12 PE=3 SV=1                                                   | 0.23 | 0.19 | 122.10 | 13622353.3 | 3  | 1 | 0 | 0.33  | 3960 | 15992 |
| >sp Q28895 NPC2_CANLF NPC intracellular cholesterol transporter 2 OS=Canis lupus familiaris OX=9615 GN=NPC2 PE=2 SV=1                                          | 0.10 | 0.02 | 137.50 | 13609297.8 | 2  | 2 | 0 | 21.48 | 149  | 153   |
| >tr J9NSS6 J9NSS6_CANLF DNA helicase OS=Canis lupus familiaris OX=9615 GN=CHD2 PE=4 SV=2                                                                       | 0.10 | 0.00 | 46.00  | 13315861.0 | 30 | 1 | 0 | 0.28  | 1780 | 1264  |
| >tr A0A5F4D9S5 A0A5F4D9S5_CANLF Hyaluronoglucosaminidase OS=Canis lupus familiaris OX=9615 GN=CEMIP PE=3 SV=1                                                  | 0.48 | 0.46 | 220.70 | 13297319.1 | 2  | 1 | 0 | 0.24  | 1684 | 9775  |
| >tr A0A5F4BQ68 A0A5F4BQ68_CANLF Interferon-induced GTP-binding protein Mx1 OS=Canis lupus familiaris OX=9615 GN=MX2 PE=3 SV=1                                  | 0.53 | 0.51 | 114.80 | 13272317.3 | 2  | 1 | 1 | 2.47  | 729  | 13816 |
| >sp P01002 IPSG_CANLF Double-headed protease inhibitor, submandibular gland OS=Canis lupus familiaris OX=9615 PE=1 SV=1                                        | 0.80 | 0.78 | 183.80 | 13232528.2 | 2  | 1 | 0 | 7.83  | 115  | 434   |
| >tr J9P2T7 J9P2T7_CANLF 26S proteasome non-ATPase regulatory subunit 5 OS=Canis lupus familiaris OX=9615 PE=4 SV=1                                             | 0.89 | 0.89 | 76.80  | 13195937.6 | 1  | 1 | 0 | 1.95  | 461  | 23870 |
| >tr F1PA52 F1PA52_CANLF Hyperpolarization activated cyclic nucleotide gated potassium and sodium channel 2 OS=Canis lupus familiaris OX=9615 GN=HCN2 PE=3 SV=3 | 0.54 | 0.54 | 191.20 | 13158030.9 | 1  | 1 | 0 | 0.73  | 821  | 34579 |
| >tr A0A5F4CCD0 A0A5F4CCD0_CANLF Cysteine rich secretory protein 2 OS=Canis lupus familiaris OX=9615 GN=CRISP2 PE=3 SV=1                                        | 0.13 | 0.13 | 174.10 | 13099870.7 | 1  | 1 | 0 | 2.25  | 311  | 11017 |

|                                                                                                                                       |      |      |        |            |    |   |   |       |      |       |
|---------------------------------------------------------------------------------------------------------------------------------------|------|------|--------|------------|----|---|---|-------|------|-------|
| >tr J9NS29 J9NS29_CANLF Cystatin domain-containing protein OS=Canis lupus familiaris OX=9615 GN=LOC607874 PE=4 SV=2                   | 0.77 | 0.75 | 186.80 | 13060868.3 | 2  | 1 | 0 | 6.39  | 313  | 30016 |
| >tr A0A5F4DCZ9 A0A5F4DCZ9_CANLF Kinase D interacting substrate 220 OS=Canis lupus familiaris OX=9615 GN=KIDINS220 PE=4 SV=1           | 0.16 | 0.16 | 101.20 | 12938678.3 | 1  | 1 | 0 | 0.60  | 1678 | 1923  |
| >sp F1PRN2 MYO1D_CANLF Unconventional myosin-IId OS=Canis lupus familiaris OX=9615 GN=MYO1D PE=1 SV=2                                 | 0.37 | 0.37 | 102.70 | 12925775.1 | 1  | 1 | 0 | 0.30  | 1006 | 763   |
| >tr A0A5F4DHH0 A0A5F4DHH0_CANLF ATP binding cassette subfamily A member 1 OS=Canis lupus familiaris OX=9615 GN=ABCA1 PE=4 SV=1        | 0.10 | 0.03 | 41.20  | 12918943.9 | 1  | 1 | 0 | 0.23  | 2175 | 3709  |
| >tr F1PIS0 F1PIS0_CANLF Ryanodine receptor 1 OS=Canis lupus familiaris OX=9615 GN=RYP1 PE=4 SV=3                                      | 0.10 | 0.03 | 41.20  | 12918943.9 | 1  | 1 | 0 | 0.10  | 5038 | 8330  |
| >tr E2RC02 E2RC02_CANLF GDP-D-mannose dehydratase OS=Canis lupus familiaris OX=9615 GN=GMD5 PE=3 SV=3                                 | 0.10 | 0.01 | 15.90  | 12892457.3 | 11 | 1 | 1 | 1.15  | 349  | 5434  |
| >tr E2RHG5 E2RHG5_CANLF Nudix hydrolase 3 OS=Canis lupus familiaris OX=9615 GN=NUDT3 PE=4 SV=1                                        | 0.26 | 0.20 | 133.00 | 12886224.2 | 4  | 1 | 0 | 6.40  | 172  | 21894 |
| >tr J9P6S2 J9P6S2_CANLF Solute carrier family 12 member 4 OS=Canis lupus familiaris OX=9615 GN=SLC12A4 PE=3 SV=2                      | 1.05 | 1.05 | 153.30 | 12860021.1 | 2  | 2 | 1 | 1.33  | 1055 | 3880  |
| >tr E2R6E0 E2R6E0_CANLF Lipocalin cytosolic FA-bd domain-containing protein OS=Canis lupus familiaris OX=9615 GN=LCNL1 PE=3 SV=2      | 2.66 | 1.39 | 209.50 | 12838532.2 | 3  | 2 | 0 | 6.69  | 299  | 1932  |
| >sp Q5TJE1 DAXX_CANLF Death domain-associated protein 6 OS=Canis lupus familiaris OX=9615 GN=DAXX PE=3 SV=1                           | 0.34 | 0.33 | 171.30 | 12837981.6 | 2  | 1 | 0 | 0.41  | 737  | 429   |
| >tr J9NS28 J9NS28_CANLF RBR-type E3 ubiquitin transferase OS=Canis lupus familiaris OX=9615 GN=ANKIB1 PE=4 SV=2                       | 0.45 | 0.45 | 71.40  | 12776431.9 | 1  | 1 | 0 | 2.33  | 988  | 26345 |
| >tr A0A5F4BPM5 A0A5F4BPM5_CANLF ILK associated serine/threonine phosphatase OS=Canis lupus familiaris OX=9615 GN=ILKAP PE=3 SV=1      | 1.51 | 1.45 | 218.50 | 12669300.9 | 4  | 1 | 1 | 2.79  | 359  | 7963  |
| >tr J9NSK0 J9NSK0_CANLF Basic helix-loop-helix family member b9 OS=Canis lupus familiaris OX=9615 GN=BHLHB9 PE=3 SV=1                 | 0.39 | 0.37 | 67.30  | 12627010.9 | 2  | 1 | 0 | 1.09  | 550  | 35937 |
| >sp Q9TU53 CUBN_CANLF Cubilin OS=Canis lupus familiaris OX=9615 GN=CUBN PE=1 SV=1                                                     | 0.10 | 0.08 | 32.90  | 12500960.0 | 2  | 1 | 0 | 0.14  | 3620 | 406   |
| >tr J9NYC7 J9NYC7_CANLF Dynein axonemal heavy chain 12 OS=Canis lupus familiaris OX=9615 GN=DNAH12 PE=3 SV=1                          | 0.34 | 0.32 | 141.90 | 12376983.9 | 2  | 1 | 0 | 0.33  | 3960 | 15992 |
| >tr F1P704 F1P704_CANLF Zona pellucida binding protein OS=Canis lupus familiaris OX=9615 GN=ZPBP PE=3 SV=3                            | 0.10 | 0.04 | 220.30 | 12326937.1 | 2  | 1 | 0 | 2.76  | 362  | 12422 |
| >tr A0A5F4CCF5 A0A5F4CCF5_CANLF Interleukin 6 signal transducer OS=Canis lupus familiaris OX=9615 GN=IL6ST PE=4 SV=1                  | 0.10 | 0.02 | 83.60  | 12292416.5 | 2  | 1 | 1 | 34.85 | 66   | 3968  |
| >tr F1PFZ5 F1PFZ5_CANLF Milk fat globule EGF and factor V/VIII domain containing OS=Canis lupus familiaris OX=9615 GN=MFGE8 PE=4 SV=3 | 1.63 | 1.59 | 272.90 | 12209066.7 | 3  | 1 | 0 | 2.57  | 428  | 7079  |
| >tr A0A5F4D020 A0A5F4D020_CANLF VWFA domain-containing protein OS=Canis lupus familiaris OX=9615 PE=3 SV=1                            | 0.10 | 0.00 | 150.60 | 12192369.0 | 2  | 1 | 0 | 1.00  | 798  | 27451 |
| >tr F1PBU5 F1PBU5_CANLF Non-specific serine/threonine protein kinase OS=Canis lupus familiaris OX=9615 GN=SMG1 PE=3 SV=3              | 0.15 | 0.15 | 159.40 | 12097641.9 | 1  | 1 | 0 | 0.08  | 3634 | 6898  |
| >tr A0A5F4CJD2 A0A5F4CJD2_CANLF Chloride channel protein OS=Canis lupus familiaris OX=9615 GN=CLCN7 PE=3 SV=1                         | 0.10 | 0.00 | 16.80  | 12089698.2 | 1  | 1 | 0 | 0.64  | 785  | 6893  |
| >sp P23685 NAC1_CANLF Sodium/calcium exchanger 1 OS=Canis lupus familiaris OX=9615 GN=SLC8A1 PE=1 SV=1                                | 0.35 | 0.36 | 147.30 | 12080140.7 | 1  | 1 | 0 | 1.03  | 970  | 764   |

|                                                                                                                                               |      |      |        |            |   |   |   |       |      |       |
|-----------------------------------------------------------------------------------------------------------------------------------------------|------|------|--------|------------|---|---|---|-------|------|-------|
| >tr J9P9K7 J9P9K7_CANLF Glycylpeptide N-tetradecanoyltransferase OS=Canis lupus familiaris OX=9615 GN=NMT2 PE=3 SV=2                          | 0.31 | 0.29 | 76.10  | 12076877.6 | 2 | 1 | 0 | 3.16  | 507  | 19368 |
| >tr A0A5F4CGN3 A0A5F4CGN3_CANLF Mitogen-activated protein kinase OS=Canis lupus familiaris OX=9615 GN=MAPK10 PE=3 SV=1                        | 0.45 | 0.43 | 121.60 | 12033344.4 | 2 | 1 | 0 | 0.86  | 464  | 863   |
| >tr A0A5F4CHN1 A0A5F4CHN1_CANLF Serine/arginine repetitive matrix 2 OS=Canis lupus familiaris OX=9615 GN=SRRM2 PE=4 SV=1                      | 1.55 | 1.24 | 197.70 | 11997739.7 | 6 | 2 | 0 | 0.27  | 2564 | 3180  |
| >tr A0A5F4D0W4 A0A5F4D0W4_CANLF Glutathione-dependent dehydroascorbate reductase OS=Canis lupus familiaris OX=9615 GN=GSTO2 PE=3 SV=1         | 0.17 | 0.17 | 87.70  | 11986125.6 | 1 | 1 | 0 | 4.15  | 337  | 26941 |
| >tr A0A5F4BNS6 A0A5F4BNS6_CANLF Transcription activation suppressor family member 2 OS=Canis lupus familiaris OX=9615 GN=TASOR2 PE=3 SV=1     | 0.19 | 0.17 | 57.80  | 11952164.7 | 2 | 1 | 0 | 0.70  | 2724 | 1014  |
| >tr F1PS80 F1PS80_CANLF Protein phosphatase 4 regulatory subunit 1 OS=Canis lupus familiaris OX=9615 GN=PPP4R1 PE=4 SV=3                      | 0.10 | 0.00 | 17.90  | 11836060.3 | 1 | 1 | 0 | 0.56  | 887  | 2666  |
| >tr F1Q455 F1Q455_CANLF PKHD1 like 1 OS=Canis lupus familiaris OX=9615 GN=PKHD1L1 PE=4 SV=3                                                   | 0.10 | 0.05 | 198.30 | 11758293.5 | 2 | 1 | 0 | 0.07  | 4263 | 3461  |
| >tr A0A5F4D9S5 A0A5F4D9S5_CANLF Hyaluronoglucosaminidase OS=Canis lupus familiaris OX=9615 GN=CEMIP PE=3 SV=1                                 | 0.46 | 0.44 | 191.60 | 11703568.0 | 2 | 1 | 0 | 0.24  | 1684 | 9775  |
| >tr A0A5F4CQE4 A0A5F4CQE4_CANLF LARGE xylosyl- and glucuronyltransferase 1 OS=Canis lupus familiaris OX=9615 GN=LARGE1 PE=4 SV=1              | 0.10 | 0.02 | 24.30  | 11686654.1 | 9 | 1 | 0 | 0.70  | 714  | 7538  |
| >tr E2R4A0 E2R4A0_CANLF Actin-like protein 7B OS=Canis lupus familiaris OX=9615 GN=ACTL7B PE=3 SV=2                                           | 0.33 | 0.31 | 150.80 | 11667250.0 | 2 | 1 | 1 | 2.42  | 454  | 3066  |
| >tr A0A5F4DIQ5 A0A5F4DIQ5_CANLF Helicase with zinc finger 2 OS=Canis lupus familiaris OX=9615 GN=HELZ2 PE=4 SV=1                              | 0.10 | 0.03 | 231.40 | 11625071.6 | 2 | 1 | 0 | 0.14  | 2929 | 1253  |
| >tr Q9XSV4 Q9XSV4_CANLF CE10 protein OS=Canis lupus familiaris OX=9615 GN=ce10 PE=2 SV=1                                                      | 0.68 | 0.56 | 153.40 | 11582539.1 | 7 | 1 | 0 | 8.18  | 110  | 41542 |
| >sp O46607 GPX5_CANLF Epididymal secretory glutathione peroxidase OS=Canis lupus familiaris OX=9615 GN=GPX5 PE=2 SV=1                         | 0.43 | 0.43 | 85.50  | 11558729.4 | 1 | 1 | 0 | 6.79  | 221  | 564   |
| >tr E2RHS5 E2RHS5_CANLF tRNA (guanine-N(7)-)-methyltransferase non-catalytic subunit WDR4 OS=Canis lupus familiaris OX=9615 GN=WDR4 PE=3 SV=1 | 0.50 | 0.36 | 112.10 | 11547415.2 | 8 | 1 | 0 | 1.72  | 406  | 22738 |
| >tr F1PHG5 F1PHG5_CANLF RING-type E3 ubiquitin transferase OS=Canis lupus familiaris OX=9615 GN=RNF138 PE=4 SV=3                              | 0.10 | 0.02 | 145.20 | 11526376.8 | 2 | 1 | 0 | 2.43  | 411  | 14298 |
| >tr E2R6E0 E2R6E0_CANLF Lipocln_cytosolic_FA-bd_dom domain-containing protein OS=Canis lupus familiaris OX=9615 GN=LCNL1 PE=3 SV=2            | 0.39 | 0.37 | 164.50 | 11428515.8 | 2 | 1 | 0 | 3.01  | 299  | 1932  |
| >tr E2R824 E2R824_CANLF Zinc finger protein 518B OS=Canis lupus familiaris OX=9615 GN=ZNF518B PE=4 SV=3                                       | 0.13 | 0.11 | 121.00 | 11390595.8 | 2 | 1 | 0 | 0.80  | 1000 | 24468 |
| >tr J9NS29 J9NS29_CANLF Cystatin domain-containing protein OS=Canis lupus familiaris OX=9615 GN=LOC607874 PE=4 SV=2                           | 1.39 | 1.37 | 145.10 | 11309808.6 | 2 | 1 | 0 | 6.39  | 313  | 30016 |
| >tr F1PZ46 F1PZ46_CANLF Tudor domain containing 12 OS=Canis lupus familiaris OX=9615 GN=TDRD12 PE=4 SV=3                                      | 0.10 | 0.00 | 159.60 | 11262139.3 | 2 | 1 | 0 | 0.23  | 1320 | 3323  |
| >tr J9NRV0 J9NRV0_CANLF Histone H4 OS=Canis lupus familiaris OX=9615 GN=H4C11 PE=3 SV=2                                                       | 0.19 | 0.17 | 150.10 | 11236927.7 | 2 | 1 | 1 | 21.78 | 101  | 7932  |
| >tr J9P0B4 J9P0B4_CANLF Tudor domain containing 15 OS=Canis lupus familiaris OX=9615 GN=TDRD15 PE=4 SV=2                                      | 1.48 | 0.89 | 105.10 | 11191609.5 | 3 | 2 | 0 | 1.85  | 2105 | 4188  |
| >tr F1Q0U7 F1Q0U7_CANLF ENAH actin regulator OS=Canis lupus familiaris OX=9615 GN=ENAH PE=3 SV=3                                              | 0.13 | 0.13 | 161.30 | 11109991.5 | 1 | 1 | 0 | 1.60  | 810  | 976   |

|                                                                                                                                         |      |      |        |            |    |   |   |      |      |       |
|-----------------------------------------------------------------------------------------------------------------------------------------|------|------|--------|------------|----|---|---|------|------|-------|
| >tr E2R6E0 E2R6E0_CANLF Lipocln_cytosolic_FA-bd_dom domain-containing protein OS=Canis lupus familiaris OX=9615 GN=LCNL1 PE=3 SV=2      | 2.02 | 1.98 | 238.10 | 11038584.9 | 3  | 1 | 0 | 3.68 | 299  | 1932  |
| >sp B8K1W2 ABCB_B_CANLF Bile salt export pump OS=Canis lupus familiaris OX=9615 GN=Abcb11e PE=1 SV=1                                    | 0.85 | 0.81 | 211.00 | 11024350.0 | 3  | 1 | 0 | 0.30 | 1325 | 527   |
| >tr A0A5F4DFY1 A0A5F4DFY1_CANLF SHH signaling and ciliogenesis regulator SDCCAG8 OS=Canis lupus familiaris OX=9615 GN=SDCCAG8 PE=4 SV=1 | 0.10 | 0.01 | 39.30  | 10965869.4 | 11 | 1 | 1 | 0.59 | 673  | 17765 |
| >tr F1Q075 F1Q075_CANLF Nuclear receptor subfamily 1 group I member 2 OS=Canis lupus familiaris OX=9615 GN=NR1I2 PE=3 SV=3              | 0.28 | 0.26 | 109.70 | 10900461.8 | 2  | 1 | 1 | 2.12 | 471  | 44187 |
| >tr A0A5F4BZW4 A0A5F4BZW4_CANLF Malonyl-CoA decarboxylase OS=Canis lupus familiaris OX=9615 GN=MLYCD PE=4 SV=1                          | 0.44 | 0.42 | 166.50 | 10873514.6 | 2  | 1 | 0 | 1.30 | 461  | 4809  |
| >tr E2RBL7 E2RBL7_CANLF DNA polymerase OS=Canis lupus familiaris OX=9615 GN=POLL PE=3 SV=2                                              | 0.32 | 0.30 | 143.60 | 10826999.5 | 2  | 1 | 0 | 1.60 | 625  | 22831 |
| >tr A0A5F4C3H5 A0A5F4C3H5_CANLF Purine rich element binding protein G OS=Canis lupus familiaris OX=9615 GN=PURG PE=3 SV=1               | 0.29 | 0.27 | 129.30 | 10817997.1 | 2  | 1 | 0 | 2.82 | 319  | 1070  |
| >tr E2RK34 E2RK34_CANLF Cytochrome P450 family 2 subfamily S member 1 OS=Canis lupus familiaris OX=9615 GN=CYP2S1 PE=3 SV=3             | 0.43 | 0.43 | 107.30 | 10797590.7 | 1  | 1 | 0 | 1.35 | 669  | 7130  |
| >tr A0A5F4C951 A0A5F4C951_CANLF F-actin monooxygenase OS=Canis lupus familiaris OX=9615 GN=MICAL3 PE=3 SV=1                             | 0.23 | 0.23 | 102.80 | 10785253.8 | 1  | 1 | 1 | 0.38 | 2113 | 4569  |
| >tr F1PKS5 F1PKS5_CANLF IRF tryptophan pentad repeat domain-containing protein OS=Canis lupus familiaris OX=9615 GN=LOC609817 PE=4 SV=3 | 0.14 | 0.12 | 76.90  | 10753371.3 | 2  | 1 | 1 | 3.17 | 441  | 4897  |
| >tr A0A5F4CZE8 A0A5F4CZE8_CANLF FAD dependent oxidoreductase domain containing 2 OS=Canis lupus familiaris OX=9615 GN=FOXRED2 PE=4 SV=1 | 0.19 | 0.17 | 34.40  | 10730748.4 | 2  | 1 | 1 | 4.84 | 723  | 4094  |
| >tr J9P3D0 J9P3D0_CANLF Solute carrier family 4 member 9 OS=Canis lupus familiaris OX=9615 GN=SLC4A9 PE=3 SV=2                          | 0.36 | 0.35 | 114.20 | 10719768.4 | 2  | 1 | 0 | 1.12 | 893  | 31921 |
| >tr A0A5F4DCA4 A0A5F4DCA4_CANLF Reverse transcriptase domain-containing protein OS=Canis lupus familiaris OX=9615 PE=4 SV=1             | 0.71 | 0.54 | 137.40 | 10686770.4 | 3  | 2 | 0 | 0.61 | 978  | 860   |
| >sp Q6AW47 EST5A_CANLF Carboxylesterase 5A OS=Canis lupus familiaris OX=9615 GN=CES5A PE=2 SV=1                                         | 0.52 | 0.52 | 190.20 | 10672246.8 | 1  | 1 | 0 | 0.87 | 575  | 629   |
| >tr A0A5F4C9V7 A0A5F4C9V7_CANLF Roundabout guidance receptor 3 OS=Canis lupus familiaris OX=9615 GN=ROBO3 PE=4 SV=1                     | 0.22 | 0.22 | 184.30 | 10638326.1 | 1  | 1 | 0 | 0.42 | 1421 | 3563  |
| >tr E2QY55 E2QY55_CANLF Isocitrate dehydrogenase [NAD] subunit, mitochondrial OS=Canis lupus familiaris OX=9615 GN=IDH3G PE=3 SV=3      | 0.15 | 0.15 | 134.60 | 10546175.6 | 1  | 1 | 0 | 2.30 | 392  | 21772 |
| >tr J9NSS6 J9NSS6_CANLF DNA helicase OS=Canis lupus familiaris OX=9615 GN=CHD2 PE=4 SV=2                                                | 0.15 | 0.12 | 29.60  | 10468514.3 | 3  | 1 | 0 | 0.28 | 1780 | 1264  |
| >tr A0A5F4CPU3 A0A5F4CPU3_CANLF SEC24 homolog D, COPII coat complex component OS=Canis lupus familiaris OX=9615 GN=SEC24D PE=3 SV=1     | 0.10 | 0.02 | 17.10  | 10412460.3 | 1  | 1 | 0 | 0.53 | 946  | 2125  |
| >tr F1PSM3 F1PSM3_CANLF Symplekin OS=Canis lupus familiaris OX=9615 GN=SYMPK PE=4 SV=2                                                  | 0.10 | 0.02 | 17.10  | 10412460.3 | 1  | 1 | 0 | 0.39 | 1275 | 9214  |
| >tr A0A5F4C2X8 A0A5F4C2X8_CANLF Fibrosin like 1 OS=Canis lupus familiaris OX=9615 GN=FBRSL1 PE=4 SV=1                                   | 0.10 | 0.00 | 149.50 | 10397764.3 | 2  | 1 | 0 | 0.71 | 985  | 1104  |
| >tr F1P8E3 F1P8E3_CANLF Glutamate metabotropic receptor 6 OS=Canis lupus familiaris OX=9615 GN=GRM6 PE=3 SV=3                           | 0.16 | 0.16 | 130.20 | 10389980.0 | 1  | 1 | 0 | 0.68 | 876  | 36035 |
| >tr F1Q4I7 F1Q4I7_CANLF Beta-1,4-N-acetylgalactosaminyltransferase OS=Canis lupus familiaris OX=9615 GN=B4GALNT3 PE=3 SV=3              | 0.38 | 0.38 | 183.50 | 10351897.6 | 1  | 1 | 0 | 0.40 | 1003 | 6004  |

|                                                                                                                                                 |      |      |        |            |   |   |   |       |      |       |
|-------------------------------------------------------------------------------------------------------------------------------------------------|------|------|--------|------------|---|---|---|-------|------|-------|
| >sp O46669 SCNAA_CANLF Sodium channel protein type 10 subunit alpha OS=Canis lupus familiaris OX=9615 GN=SCN10A PE=2 SV=1                       | 0.35 | 0.36 | 111.50 | 10351897.6 | 1 | 1 | 0 | 0.15  | 1962 | 90    |
| >tr E2RCT1 E2RCT1_CANLF WAP domain-containing protein OS=Canis lupus familiaris OX=9615 PE=4 SV=2                                               | 1.69 | 1.38 | 135.60 | 10298958.6 | 2 | 2 | 0 | 23.28 | 116  | 21717 |
| >tr E2RCT1 E2RCT1_CANLF WAP domain-containing protein OS=Canis lupus familiaris OX=9615 PE=4 SV=2                                               | 0.73 | 0.69 | 208.70 | 10288892.1 | 3 | 1 | 0 | 14.66 | 116  | 21717 |
| >tr J9P801 J9P801_CANLF Jade family PHD finger 2 OS=Canis lupus familiaris OX=9615 GN=JADE2 PE=4 SV=1                                           | 0.24 | 0.24 | 50.10  | 10235919.7 | 2 | 1 | 1 | 0.64  | 781  | 4296  |
| >tr E2R6E0 E2R6E0_CANLF Lipocln_cytosolic_FA-bd_dom domain-containing protein OS=Canis lupus familiaris OX=9615 GN=LCNL1 PE=3 SV=2              | 2.41 | 2.35 | 243.70 | 10222630.6 | 4 | 1 | 0 | 3.68  | 299  | 1932  |
| >tr J9P2T7 J9P2T7_CANLF 26S proteasome non-ATPase regulatory subunit 5 OS=Canis lupus familiaris OX=9615 PE=4 SV=1                              | 0.21 | 0.19 | 111.70 | 10219823.1 | 2 | 1 | 0 | 1.95  | 461  | 23870 |
| >tr A0A5F4CSE7 A0A5F4CSE7_CANLF TYR_PHOSPHATASE_2 domain-containing protein OS=Canis lupus familiaris OX=9615 GN=PTP4A1 PE=4 SV=1               | 0.10 | 0.01 | 57.80  | 10216523.6 | 1 | 1 | 1 | 5.20  | 173  | 25182 |
| >tr E2RRP1 E2RRP1_CANLF Butyryl-CoA dehydrogenase OS=Canis lupus familiaris OX=9615 GN=IVD PE=3 SV=2                                            | 0.10 | 0.06 | 87.50  | 10207941.6 | 2 | 1 | 0 | 3.99  | 426  | 10739 |
| >tr A0A5F4CLU1 A0A5F4CLU1_CANLF Superoxide dismutase [Cu-Zn] OS=Canis lupus familiaris OX=9615 GN=SOD1 PE=3 SV=1                                | 0.10 | 0.06 | 174.10 | 10138293.1 | 2 | 1 | 0 | 7.09  | 141  | 25417 |
| >tr A0A5F4D9Z7 A0A5F4D9Z7_CANLF Zinc finger FYVE-type containing 19 OS=Canis lupus familiaris OX=9615 GN=ZFYE19 PE=4 SV=1                       | 0.58 | 0.58 | 127.50 | 10137454.4 | 1 | 1 | 0 | 1.53  | 392  | 13875 |
| >tr A0A5F4D7Y5 A0A5F4D7Y5_CANLF Pleckstrin homology, MyTH4 and FERM domain containing H1 OS=Canis lupus familiaris OX=9615 GN=PLEKHH1 PE=4 SV=1 | 0.34 | 0.33 | 194.40 | 10122263.9 | 2 | 1 | 0 | 0.30  | 1342 | 5979  |
| >sp P83509 RHG35_CANLF Rho GTPase-activating protein 35 OS=Canis lupus familiaris OX=9615 GN=ARHGAP35 PE=2 SV=1                                 | 0.42 | 0.40 | 98.10  | 10086811.8 | 2 | 1 | 1 | 0.73  | 1500 | 323   |
| >tr F1P7G9 F1P7G9_CANLF Endoribonuclease OS=Canis lupus familiaris OX=9615 GN=ERN1 PE=4 SV=3                                                    | 0.32 | 0.32 | 99.50  | 10005410.1 | 1 | 1 | 0 | 1.74  | 975  | 20005 |
| >tr A0A5F4CAH2 A0A5F4CAH2_CANLF RNA polymerase II subunit A C-terminal domain phosphatase OS=Canis lupus familiaris OX=9615 GN=CTDP1 PE=4 SV=1  | 0.30 | 0.30 | 102.70 | 10002869.5 | 2 | 1 | 0 | 0.74  | 945  | 14396 |
| >tr A0A5F4CQ96 A0A5F4CQ96_CANLF ATP binding cassette subfamily G member 8 OS=Canis lupus familiaris OX=9615 GN=ABCG8 PE=3 SV=1                  | 0.19 | 0.17 | 185.90 | 9998253.4  | 2 | 1 | 0 | 1.84  | 707  | 17201 |
| >tr A0A5F4D6L9 A0A5F4D6L9_CANLF Sacsin molecular chaperone OS=Canis lupus familiaris OX=9615 GN=SACS PE=4 SV=1                                  | 0.10 | 0.00 | 16.40  | 9968752.9  | 6 | 2 | 0 | 0.16  | 4500 | 1444  |
| >tr F1PLU0 F1PLU0_CANLF Histone-lysine N-methyltransferase OS=Canis lupus familiaris OX=9615 GN=KMT2A PE=3 SV=3                                 | 0.13 | 0.12 | 95.30  | 9933961.8  | 2 | 1 | 1 | 0.34  | 3822 | 11664 |
| >tr J9NS28 J9NS28_CANLF RBR-type E3 ubiquitin transferase OS=Canis lupus familiaris OX=9615 GN=ANKIB1 PE=4 SV=2                                 | 0.45 | 0.43 | 26.50  | 9933373.8  | 2 | 1 | 0 | 2.33  | 988  | 26345 |
| >tr E2R7J0 E2R7J0_CANLF FRA10A associated CGG repeat 1 OS=Canis lupus familiaris OX=9615 GN=FRA10AC1 PE=4 SV=2                                  | 0.13 | 0.13 | 117.30 | 9912961.9  | 1 | 1 | 0 | 2.24  | 313  | 9020  |
| >tr A0A5F4D963 A0A5F4D963_CANLF Microtubule-associated protein OS=Canis lupus familiaris OX=9615 GN=MAP4 PE=4 SV=1                              | 0.10 | 0.03 | 150.30 | 9839670.6  | 2 | 1 | 0 | 0.23  | 2214 | 10459 |
| >tr E2RG75 E2RG75_CANLF Inactive ribonuclease-like protein 9 OS=Canis lupus familiaris OX=9615 GN=RNASE9 PE=3 SV=2                              | 2.11 | 2.05 | 300.50 | 9687786.3  | 4 | 1 | 1 | 4.55  | 198  | 41734 |
| >tr A0A5F4D6G2 A0A5F4D6G2_CANLF SMG7 nonsense mediated mRNA decay factor OS=Canis lupus familiaris OX=9615 GN=SMG7 PE=4 SV=1                    | 0.14 | 0.14 | 228.60 | 9672062.0  | 1 | 1 | 0 | 0.43  | 1175 | 2075  |

|                                                                                                                                           |      |      |        |           |   |   |   |       |      |       |
|-------------------------------------------------------------------------------------------------------------------------------------------|------|------|--------|-----------|---|---|---|-------|------|-------|
| >tr A0A5F4DI92 A0A5F4DI92_CANLF DNA helicase OS=Canis lupus familiaris OX=9615 GN=CHD6 PE=3 SV=1                                          | 0.16 | 0.14 | 152.60 | 9635686.3 | 2 | 1 | 0 | 0.26  | 2685 | 3470  |
| >sp Q28895 NPC2_CANLF NPC intracellular cholesterol transporter 2 OS=Canis lupus familiaris OX=9615 GN=NPC2 PE=2 SV=1                     | 2.30 | 1.36 | 230.90 | 9613375.0 | 4 | 2 | 0 | 14.77 | 149  | 153   |
| >sp O46669 SCNAA_CANLF Sodium channel protein type 10 subunit alpha OS=Canis lupus familiaris OX=9615 GN=SCN10A PE=2 SV=1                 | 0.84 | 0.56 | 143.90 | 9602299.5 | 2 | 2 | 0 | 0.31  | 1962 | 90    |
| >tr J9JHJ0 J9JHJ0_CANLF Testis expressed 50 OS=Canis lupus familiaris OX=9615 GN=TEX50 PE=4 SV=2                                          | 0.12 | 0.10 | 162.50 | 9541580.5 | 2 | 1 | 1 | 7.34  | 177  | 3785  |
| >tr F1Q2M4 F1Q2M4_CANLF DNA topoisomerase 2 OS=Canis lupus familiaris OX=9615 GN=TOP2A PE=3 SV=3                                          | 0.35 | 0.32 | 158.80 | 9534871.7 | 2 | 2 | 0 | 0.52  | 1532 | 1808  |
| >tr F1Q0P9 F1Q0P9_CANLF AT-hook containing transcription factor 1 OS=Canis lupus familiaris OX=9615 GN=AHCTF1 PE=4 SV=3                   | 0.78 | 0.76 | 218.80 | 9531480.1 | 2 | 1 | 0 | 0.39  | 2321 | 1521  |
| >tr A0A5F4BNS6 A0A5F4BNS6_CANLF Transcription activation suppressor family member 2 OS=Canis lupus familiaris OX=9615 GN=TASOR2 PE=3 SV=1 | 0.12 | 0.11 | 24.70  | 9503267.6 | 2 | 1 | 0 | 0.70  | 2724 | 1014  |
| >sp Q9GL25 ESPB1_CANLF Epididymal sperm-binding protein 1 OS=Canis lupus familiaris OX=9615 GN=ELSPBP1 PE=1 SV=1                          | 1.22 | 1.22 | 194.20 | 9429510.7 | 1 | 1 | 0 | 6.94  | 245  | 36    |
| >tr E2RSE8 E2RSE8_CANLF Vacuolar protein sorting-associated protein 11 homolog OS=Canis lupus familiaris OX=9615 GN=VPS11 PE=3 SV=1       | 0.46 | 0.44 | 164.10 | 9428095.3 | 2 | 1 | 0 | 0.85  | 941  | 17796 |
| >tr A0A5F4CHN1 A0A5F4CHN1_CANLF Serine/arginine repetitive matrix 2 OS=Canis lupus familiaris OX=9615 GN=SRRM2 PE=4 SV=1                  | 0.30 | 0.28 | 147.90 | 9418999.7 | 2 | 1 | 0 | 0.12  | 2564 | 3180  |
| >sp P21842 CMA1_CANLF Chymase OS=Canis lupus familiaris OX=9615 GN=CMA1 PE=1 SV=1                                                         | 0.19 | 0.17 | 104.40 | 9168112.1 | 2 | 1 | 0 | 0.80  | 249  | 34    |
| >sp Q9XS65 PTGDS_CANLF Prostaglandin-H2 D-isomerase OS=Canis lupus familiaris OX=9615 GN=PTGDS PE=2 SV=1                                  | 0.30 | 0.28 | 174.80 | 9131226.7 | 2 | 1 | 0 | 3.14  | 191  | 165   |
| >tr A0A5F4CGE0 A0A5F4CGE0_CANLF Ubiquitin protein ligase E3C OS=Canis lupus familiaris OX=9615 GN=UBE3C PE=4 SV=1                         | 0.36 | 0.36 | 137.20 | 9093807.6 | 1 | 1 | 0 | 0.97  | 1238 | 9018  |
| >tr A0A5F4BX72 A0A5F4BX72_CANLF UV-stimulated scaffold protein A OS=Canis lupus familiaris OX=9615 GN=UVSSA PE=3 SV=1                     | 0.10 | 0.06 | 16.80  | 9093807.6 | 1 | 1 | 0 | 3.09  | 679  | 16191 |
| >tr A0A5F4CWD8 A0A5F4CWD8_CANLF Replication factor C subunit 4 OS=Canis lupus familiaris OX=9615 GN=RFC4 PE=3 SV=1                        | 0.33 | 0.33 | 130.30 | 9078300.7 | 1 | 1 | 0 | 2.68  | 336  | 34365 |
| >tr E2RRP3 E2RRP3_CANLF LIM homeobox 5 OS=Canis lupus familiaris OX=9615 GN=LHX5 PE=4 SV=1                                                | 0.12 | 0.12 | 136.30 | 9045969.1 | 1 | 1 | 0 | 2.24  | 402  | 19607 |
| >tr F1PQ34 F1PQ34_CANLF RCC1 and BTB domain containing protein 2 OS=Canis lupus familiaris OX=9615 GN=RCBTB2 PE=4 SV=3                    | 0.10 | 0.02 | 63.70  | 9027790.8 | 1 | 1 | 0 | 1.23  | 326  | 6990  |
| >tr J9NSK0 J9NSK0_CANLF Basic helix-loop-helix family member b9 OS=Canis lupus familiaris OX=9615 GN=BHLHB9 PE=3 SV=1                     | 0.45 | 0.45 | 73.10  | 9024477.8 | 1 | 1 | 0 | 1.09  | 550  | 35937 |
| >tr E2QWH7 E2QWH7_CANLF Coiled-coil domain containing 127 OS=Canis lupus familiaris OX=9615 GN=CCDC127 PE=4 SV=3                          | 0.36 | 0.36 | 7.90   | 8996840.8 | 1 | 1 | 0 | 3.34  | 479  | 28521 |
| >tr J9JH98 J9JH98_CANLF Olfactory receptor family 1 subfamily L member 6 OS=Canis lupus familiaris OX=9615 GN=OR1L6 PE=4 SV=1             | 0.11 | 0.11 | 82.60  | 8909188.5 | 1 | 1 | 1 | 6.77  | 310  | 3096  |
| >tr E2R269 E2R269_CANLF Ubiquitinyl hydrolase 1 OS=Canis lupus familiaris OX=9615 GN=VCIPI1 PE=4 SV=1                                     | 0.99 | 0.95 | 87.70  | 8805102.3 | 3 | 1 | 0 | 1.39  | 1220 | 40849 |
| >tr F1PTW3 F1PTW3_CANLF KIAA0753 OS=Canis lupus familiaris OX=9615 GN=KIAA0753 PE=4 SV=3                                                  | 0.41 | 0.37 | 155.90 | 8765844.2 | 3 | 1 | 0 | 0.88  | 905  | 33899 |

|                                                                                                                                           |      |      |        |           |    |   |   |      |      |       |
|-------------------------------------------------------------------------------------------------------------------------------------------|------|------|--------|-----------|----|---|---|------|------|-------|
| >tr J9P3H8 J9P3H8_CANLF ATM interactor OS=Canis lupus familiaris OX=9615 GN=ATMIN PE=4 SV=2                                               | 0.10 | 0.02 | 58.30  | 8764056.9 | 9  | 1 | 0 | 0.58 | 863  | 882   |
| >tr E2R4A0 E2R4A0_CANLF Actin-like protein 7B OS=Canis lupus familiaris OX=9615 GN=ACTL7B PE=3 SV=2                                       | 0.25 | 0.23 | 122.50 | 8745609.6 | 2  | 1 | 1 | 2.42 | 454  | 3066  |
| >tr Q9XSV4 Q9XSV4_CANLF CE10 protein OS=Canis lupus familiaris OX=9615 GN=ce10 PE=2 SV=1                                                  | 4.79 | 2.30 | 363.30 | 8673546.3 | 75 | 2 | 0 | 9.09 | 110  | 41542 |
| >tr E2RDT3 E2RDT3_CANLF Protein Mdm4 OS=Canis lupus familiaris OX=9615 GN=MDM4 PE=3 SV=3                                                  | 0.10 | 0.03 | 61.10  | 8668513.4 | 1  | 1 | 0 | 4.48 | 491  | 11032 |
| >sp Q8WN22 PRKDC_CANLF DNA-dependent protein kinase catalytic subunit OS=Canis lupus familiaris OX=9615 GN=PRKDC PE=2 SV=1                | 1.85 | 1.39 | 101.60 | 8643845.6 | 3  | 2 | 0 | 0.12 | 4144 | 338   |
| >tr A0A5F4CPE1 A0A5F4CPE1_CANLF Major facilitator superfamily domain containing 14B OS=Canis lupus familiaris OX=9615 GN=MFS14B PE=4 SV=1 | 0.38 | 0.38 | 38.30  | 8631560.7 | 1  | 1 | 0 | 3.71 | 485  | 28321 |
| >tr A0A5F4D3Q2 A0A5F4D3Q2_CANLF Non-specific serine/threonine protein kinase OS=Canis lupus familiaris OX=9615 GN=ATR PE=3 SV=1           | 0.47 | 0.45 | 151.30 | 8534283.6 | 3  | 1 | 0 | 0.35 | 2583 | 7077  |
| >tr E2RQR2 E2RQR2_CANLF Olfactory receptor family 13 subfamily P member 3 OS=Canis lupus familiaris OX=9615 GN=OR13P3 PE=4 SV=2           | 0.30 | 0.30 | 54.50  | 8458140.2 | 1  | 1 | 0 | 6.73 | 312  | 15310 |
| >sp B8K1W2 ABCB11e CANLF Bile salt export pump OS=Canis lupus familiaris OX=9615 GN=Abcb11e PE=1 SV=1                                     | 0.58 | 0.54 | 238.80 | 8447881.1 | 3  | 1 | 0 | 0.30 | 1325 | 527   |
| >tr A0A5F4D824 A0A5F4D824_CANLF Zinc finger RANBP2-type containing 3 OS=Canis lupus familiaris OX=9615 GN=ZNRANBP2 PE=4 SV=1              | 0.37 | 0.37 | 108.80 | 8389955.8 | 1  | 1 | 0 | 0.53 | 1128 | 1130  |
| >tr E2RN16 E2RN16_CANLF Mitogen-activated protein kinase kinase kinase 2 OS=Canis lupus familiaris OX=9615 GN=MAP3K2 PE=4 SV=2            | 0.10 | 0.01 | 157.80 | 8039775.1 | 1  | 1 | 0 | 0.97 | 620  | 34325 |
| >tr F6XW36 F6XW36_CANLF SH2 domain containing 4B OS=Canis lupus familiaris OX=9615 GN=SH2D4B PE=4 SV=1                                    | 0.35 | 0.35 | 87.70  | 8005068.1 | 1  | 1 | 0 | 2.31 | 433  | 13011 |
| >tr A0A5F4D961 A0A5F4D961_CANLF GLIPR1 like 2 OS=Canis lupus familiaris OX=9615 GN=GLIPR1L2 PE=4 SV=1                                     | 0.10 | 0.00 | 49.60  | 7958313.5 | 10 | 1 | 0 | 2.40 | 167  | 10571 |
| >tr A0A5K1V0D8 A0A5K1V0D8_CANLF Sulfatase 2 OS=Canis lupus familiaris OX=9615 GN=SULF2 PE=3 SV=1                                          | 0.82 | 0.80 | 179.30 | 7953313.6 | 2  | 1 | 0 | 0.35 | 859  | 1192  |
| >tr E2RTL2 E2RTL2_CANLF Tubulin tyrosine ligase like 6 OS=Canis lupus familiaris OX=9615 GN=TTLL6 PE=4 SV=3                               | 0.10 | 0.07 | 37.30  | 7928933.2 | 1  | 1 | 0 | 0.60 | 827  | 2703  |
| >tr Q9XSV4 Q9XSV4_CANLF CE10 protein OS=Canis lupus familiaris OX=9615 GN=ce10 PE=2 SV=1                                                  | 1.04 | 0.96 | 286.80 | 7912428.8 | 5  | 1 | 0 | 8.18 | 110  | 41542 |
| >tr Q2A652 Q2A652_CANLF G-protein coupled receptor OS=Canis lupus familiaris OX=9615 GN=PTGDR2 PE=2 SV=1                                  | 0.83 | 0.83 | 131.50 | 7904084.5 | 1  | 1 | 0 | 1.25 | 400  | 41469 |
| >tr J9P5T2 J9P5T2_CANLF Non-specific serine/threonine protein kinase OS=Canis lupus familiaris OX=9615 GN=WNK3 PE=4 SV=2                  | 0.10 | 0.00 | 65.70  | 7615324.0 | 6  | 1 | 0 | 0.22 | 2294 | 5229  |
| >tr A0A5F4BT89 A0A5F4BT89_CANLF Olfactory receptor OS=Canis lupus familiaris OX=9615 GN=OR5W6 PE=3 SV=1                                   | 0.64 | 0.64 | 86.50  | 7580025.7 | 1  | 1 | 1 | 6.95 | 302  | 29923 |
| >tr J9P2Y5 J9P2Y5_CANLF MAK16 homolog OS=Canis lupus familiaris OX=9615 GN=MAK16 PE=3 SV=2                                                | 0.55 | 0.55 | 189.80 | 7568316.9 | 2  | 2 | 1 | 1.34 | 599  | 17345 |
| >tr F1PH76 F1PH76_CANLF Olfactory receptor OS=Canis lupus familiaris OX=9615 GN=OR4H12 PE=3 SV=2                                          | 0.12 | 0.12 | 94.60  | 7559293.4 | 1  | 1 | 0 | 2.91 | 309  | 20031 |
| >tr E2R4F0 E2R4F0_CANLF Cadherin EGF LAG seven-pass G-type receptor 2 OS=Canis lupus familiaris OX=9615 GN=CELSR2 PE=3 SV=2               | 0.21 | 0.22 | 46.30  | 7548313.9 | 1  | 1 | 1 | 0.65 | 2919 | 12898 |

|                                                                                                                                          |      |      |        |           |    |   |   |       |      |       |
|------------------------------------------------------------------------------------------------------------------------------------------|------|------|--------|-----------|----|---|---|-------|------|-------|
| >tr F1PTB2 F1PTB2_CANLF Interleukin 6 signal transducer OS=Canis lupus familiaris<br>OX=9615 GN=IL6ST PE=3 SV=3                          | 0.26 | 0.27 | 105.80 | 7534976.6 | 1  | 1 | 0 | 0.35  | 867  | 4860  |
| >tr A0A5F4CPU3 A0A5F4CPU3_CANLF SEC24 homolog D, COPII coat complex component<br>OS=Canis lupus familiaris OX=9615 GN=SEC24D PE=3 SV=1   | 0.54 | 0.54 | 5.70   | 7527381.6 | 1  | 1 | 0 | 0.53  | 946  | 2125  |
| >tr F1PSM3 F1PSM3_CANLF Symplekin OS=Canis lupus familiaris OX=9615 GN=SYMPK<br>PE=4 SV=2                                                | 0.54 | 0.54 | 5.70   | 7527381.6 | 1  | 1 | 0 | 0.39  | 1275 | 9214  |
| >tr E2R186 E2R186_CANLF Fibroblast growth factor receptor OS=Canis lupus familiaris<br>OX=9615 GN=FGFR1 PE=3 SV=3                        | 0.16 | 0.03 | 95.30  | 7524778.9 | 9  | 1 | 0 | 0.59  | 853  | 9797  |
| >tr A0A5F4CGN3 A0A5F4CGN3_CANLF Mitogen-activated protein kinase OS=Canis lupus<br>familiaris OX=9615 GN=MAPK10 PE=3 SV=1                | 1.14 | 1.14 | 132.70 | 7406255.4 | 1  | 1 | 0 | 0.86  | 464  | 863   |
| >tr F1PEE8 F1PEE8_CANLF Ryanodine receptor 2 OS=Canis lupus familiaris OX=9615<br>GN=RYP2 PE=4 SV=3                                      | 0.16 | 0.17 | 95.00  | 7402159.8 | 1  | 1 | 0 | 0.22  | 4903 | 13641 |
| >tr E2RG96 E2RG96_CANLF Glutamate receptor OS=Canis lupus familiaris OX=9615<br>GN=GRIN2C PE=3 SV=3                                      | 0.33 | 0.33 | 44.70  | 7335816.2 | 1  | 1 | 0 | 1.90  | 1212 | 31148 |
| >tr A0A5F4CPY7 A0A5F4CPY7_CANLF von Willebrand factor A domain containing 5A<br>OS=Canis lupus familiaris OX=9615 GN=VWA5A PE=4 SV=1     | 0.45 | 0.45 | 208.90 | 7332917.7 | 1  | 1 | 0 | 0.75  | 803  | 1309  |
| >tr F1PPP9 F1PPP9_CANLF Family with sequence similarity 135 member A OS=Canis lupus<br>familiaris OX=9615 GN=FAM135A PE=3 SV=3           | 0.84 | 0.78 | 111.30 | 7288820.4 | 4  | 1 | 0 | 1.22  | 1399 | 6815  |
| >sp P38377 S61A1_CANLF Protein transport protein Sec61 subunit alpha isoform 1 OS=Canis<br>lupus familiaris OX=9615 GN=SEC61A1 PE=1 SV=3 | 0.82 | 0.80 | 182.90 | 7286196.4 | 2  | 1 | 0 | 0.84  | 476  | 358   |
| >tr A0A5F4D2X6 A0A5F4D2X6_CANLF AF4/FMR2 family member 3 OS=Canis lupus<br>familiaris OX=9615 GN=AFF3 PE=3 SV=1                          | 1.11 | 1.11 | 242.40 | 7260522.1 | 1  | 1 | 0 | 0.41  | 1213 | 3298  |
| >sp B8K1W2 ABCB11e ABCB11e_CANLF Bile salt export pump OS=Canis lupus familiaris OX=9615<br>GN=Abcb11e PE=1 SV=1                         | 0.56 | 0.54 | 178.50 | 7250369.8 | 2  | 1 | 0 | 0.30  | 1325 | 527   |
| >tr A0A5F4C2N8 A0A5F4C2N8_CANLF Sperm protamine P1 OS=Canis lupus familiaris<br>OX=9615 PE=3 SV=1                                        | 0.28 | 0.28 | 204.10 | 7228673.5 | 1  | 1 | 0 | 10.00 | 50   | 7114  |
| >tr E2QXS1 E2QXS1_CANLF Lipase A, lysosomal acid type OS=Canis lupus familiaris<br>OX=9615 GN=LIPA PE=4 SV=3                             | 0.51 | 0.51 | 70.20  | 7158421.9 | 1  | 1 | 1 | 3.60  | 500  | 2185  |
| >tr A0A5F4BPM5 A0A5F4BPM5_CANLF ILK associated serine/threonine phosphatase<br>OS=Canis lupus familiaris OX=9615 GN=ILKAP PE=3 SV=1      | 0.76 | 0.74 | 209.90 | 7113276.4 | 2  | 1 | 1 | 3.06  | 359  | 7963  |
| >tr E2RG75 E2RG75_CANLF Inactive ribonuclease-like protein 9 OS=Canis lupus familiaris<br>OX=9615 GN=RNASE9 PE=3 SV=2                    | 2.36 | 1.63 | 372.30 | 7097027.3 | 4  | 2 | 1 | 4.55  | 198  | 41734 |
| >tr J9P7Y2 J9P7Y2_CANLF Angiotensin-converting enzyme OS=Canis lupus familiaris<br>OX=9615 GN=ACE2 PE=3 SV=1                             | 0.34 | 0.34 | 55.10  | 7049933.8 | 1  | 1 | 0 | 1.62  | 804  | 1041  |
| >tr F6V7I1 F6V7I1_CANLF Dynein axonemal heavy chain 2 OS=Canis lupus familiaris<br>OX=9615 GN=DNAH2 PE=3 SV=2                            | 0.41 | 0.41 | 230.90 | 7039118.5 | 1  | 1 | 0 | 0.14  | 4378 | 7034  |
| >tr E2RHB9 E2RHB9_CANLF Squalene monooxygenase OS=Canis lupus familiaris OX=9615<br>GN=SQLE PE=3 SV=1                                    | 0.35 | 0.35 | 16.90  | 6939911.0 | 1  | 1 | 1 | 3.32  | 573  | 31440 |
| >tr A0A5F4CLU1 A0A5F4CLU1_CANLF Superoxide dismutase [Cu-Zn] OS=Canis lupus<br>familiaris OX=9615 GN=SOD1 PE=3 SV=1                      | 0.26 | 0.26 | 69.10  | 6925232.1 | 1  | 1 | 0 | 7.09  | 141  | 25417 |
| >tr E2QY94 E2QY94_CANLF Sphingomyelin synthase 2 OS=Canis lupus familiaris OX=9615<br>GN=SGMS2 PE=3 SV=1                                 | 0.17 | 0.17 | 60.00  | 6833113.2 | 1  | 1 | 1 | 4.93  | 365  | 18937 |
| >tr F1PR54 F1PR54_CANLF Lactotransferrin OS=Canis lupus familiaris OX=9615 GN=LTF<br>PE=3 SV=1                                           | 4.28 | 1.90 | 329.20 | 6821944.9 | 33 | 4 | 0 | 7.49  | 708  | 40436 |

|                                                                                                                                                    |      |      |        |           |    |   |   |      |      |       |
|----------------------------------------------------------------------------------------------------------------------------------------------------|------|------|--------|-----------|----|---|---|------|------|-------|
| >tr J9NZH4 J9NZH4_CANLF NTR domain-containing protein OS=Canis lupus familiaris<br>OX=9615 GN=LOC102154527 PE=3 SV=2                               | 1.27 | 1.27 | 96.30  | 6813856.5 | 1  | 1 | 0 | 8.60 | 221  | 39505 |
| >tr J9P9F3 J9P9F3_CANLF Protein tyrosine phosphatase domain containing 1 OS=Canis lupus familiaris<br>OX=9615 GN=PTPDC1 PE=4 SV=1                  | 0.50 | 0.50 | 145.40 | 6775985.8 | 1  | 1 | 0 | 1.47 | 748  | 24460 |
| >tr A0A5F4CAN7 A0A5F4CAN7_CANLF RBR-type E3 ubiquitin transferase OS=Canis lupus familiaris<br>OX=9615 GN=RNFI44A PE=4 SV=1                        | 0.10 | 0.07 | 59.20  | 6725146.3 | 1  | 1 | 1 | 2.31 | 347  | 23811 |
| >tr F1PFZ5 F1PFZ5_CANLF Milk fat globule EGF and factor V/VIII domain containing OS=Canis lupus familiaris<br>OX=9615 GN=MFGE8 PE=4 SV=3           | 0.25 | 0.25 | 147.50 | 6719153.7 | 1  | 1 | 0 | 1.87 | 428  | 7079  |
| >tr A0A5F4D7Y5 A0A5F4D7Y5_CANLF Pleckstrin homology, MyTH4 and FERM domain containing H1 OS=Canis lupus familiaris<br>OX=9615 GN=PLEKHH1 PE=4 SV=1 | 0.16 | 0.16 | 203.30 | 6699243.3 | 1  | 1 | 0 | 0.30 | 1342 | 5979  |
| >sp Q9GKQ8 DSG1_CANLF Desmoglein-1 OS=Canis lupus familiaris OX=9615 GN=DSG1 PE=2 SV=1                                                             | 0.41 | 0.41 | 201.70 | 6644458.8 | 1  | 1 | 0 | 0.47 | 1054 | 524   |
| >tr A0A5F4DI20 A0A5F4DI20_CANLF Aryl hydrocarbon receptor nuclear translocator OS=Canis lupus familiaris<br>OX=9615 GN=ARNT PE=4 SV=1              | 0.10 | 0.03 | 169.30 | 6591554.4 | 1  | 1 | 0 | 0.40 | 753  | 1214  |
| >tr A0A5F4C1S8 A0A5F4C1S8_CANLF E3 ubiquitin-protein ligase CBL OS=Canis lupus familiaris<br>OX=9615 GN=CBL PE=4 SV=1                              | 0.19 | 0.17 | 144.90 | 6581470.8 | 2  | 1 | 0 | 0.39 | 773  | 1308  |
| >tr A0A5F4CMF9 A0A5F4CMF9_CANLF Cilia and flagella associated protein 65 OS=Canis lupus familiaris<br>OX=9615 GN=CFAP65 PE=4 SV=1                  | 0.36 | 0.36 | 139.30 | 6548062.7 | 1  | 1 | 0 | 0.17 | 1789 | 4175  |
| >tr F1P914 F1P914_CANLF Major vault protein OS=Canis lupus familiaris OX=9615 GN=MVP PE=4 SV=3                                                     | 0.31 | 0.31 | 75.10  | 6542288.9 | 1  | 1 | 1 | 2.38 | 923  | 6261  |
| >tr A0A5F4D4Z3 A0A5F4D4Z3_CANLF Myosin IXA OS=Canis lupus familiaris OX=9615 GN=MYO9A PE=3 SV=1                                                    | 0.90 | 0.91 | 175.60 | 6472391.0 | 1  | 1 | 0 | 0.31 | 2619 | 12945 |
| >tr F1PHA9 F1PHA9_CANLF Motile sperm domain containing 2 OS=Canis lupus familiaris<br>OX=9615 GN=MOSPD2 PE=4 SV=3                                  | 0.13 | 0.14 | 123.60 | 6466169.2 | 1  | 1 | 0 | 0.97 | 518  | 10201 |
| >sp O18840 ACTB_CANLF Actin, cytoplasmic 1 OS=Canis lupus familiaris OX=9615 GN=ACTB PE=2 SV=3                                                     | 2.78 | 1.43 | 346.50 | 6383688.9 | 12 | 2 | 0 | 7.73 | 375  | 642   |
| >tr A0A5F4DIZ9 A0A5F4DIZ9_CANLF Dynein axonemal heavy chain 3 OS=Canis lupus familiaris<br>OX=9615 GN=DNAH3 PE=3 SV=1                              | 0.19 | 0.17 | 136.30 | 6342296.9 | 3  | 2 | 1 | 0.37 | 3229 | 26729 |
| >tr J9NW72 J9NW72_CANLF Sperm associated antigen 8 OS=Canis lupus familiaris OX=9615 GN=SPAG8 PE=4 SV=1                                            | 0.58 | 0.58 | 91.70  | 6338436.5 | 1  | 1 | 0 | 4.07 | 442  | 10371 |
| >tr E2RDB0 E2RDB0_CANLF Phosphate regulating endopeptidase homolog X-linked OS=Canis lupus familiaris<br>OX=9615 GN=PHEX PE=4 SV=2                 | 0.10 | 0.07 | 135.90 | 6320761.7 | 1  | 1 | 1 | 1.34 | 749  | 2968  |
| >tr E2RRP3 E2RRP3_CANLF LIM homeobox 5 OS=Canis lupus familiaris OX=9615 GN=LHX5 PE=4 SV=1                                                         | 0.10 | 0.00 | 154.40 | 6313101.1 | 1  | 1 | 0 | 2.24 | 402  | 19607 |
| >tr F1P6B8 F1P6B8_CANLF Intraflagellar transport protein 57 homolog OS=Canis lupus familiaris<br>OX=9615 GN=IFT57 PE=3 SV=3                        | 0.15 | 0.15 | 103.70 | 6262225.7 | 1  | 1 | 0 | 0.83 | 482  | 4757  |
| >tr A0A5F4BZS6 A0A5F4BZS6_CANLF Solute carrier family 41 member 3 OS=Canis lupus familiaris<br>OX=9615 GN=SLC41A3 PE=3 SV=1                        | 0.26 | 0.26 | 54.40  | 6216044.8 | 1  | 1 | 1 | 4.36 | 711  | 8952  |
| >tr A0A5F4CI07 A0A5F4CI07_CANLF RAB3 GTPase activating non-catalytic protein subunit 2 OS=Canis lupus familiaris<br>OX=9615 GN=RAB3GAP2 PE=3 SV=1  | 0.13 | 0.13 | 113.70 | 6213974.0 | 1  | 1 | 0 | 0.79 | 1515 | 5216  |
| >tr F6V7I1 F6V7I1_CANLF Dynein axonemal heavy chain 2 OS=Canis lupus familiaris<br>OX=9615 GN=DNAH2 PE=3 SV=2                                      | 0.44 | 0.44 | 193.50 | 6180024.1 | 1  | 1 | 0 | 0.14 | 4378 | 7034  |
| >tr J9NVV6 J9NVV6_CANLF Cytochrome P450 family 4 subfamily X member 1 OS=Canis lupus familiaris<br>OX=9615 GN=CYP4X1 PE=3 SV=1                     | 0.51 | 0.47 | 138.70 | 6162076.2 | 3  | 1 | 0 | 3.43 | 495  | 17759 |

|                                                                                                                                                 |      |      |        |           |   |   |   |       |      |       |
|-------------------------------------------------------------------------------------------------------------------------------------------------|------|------|--------|-----------|---|---|---|-------|------|-------|
| >sp P21842 CMA1_CANLF Chymase OS=Canis lupus familiaris OX=9615 GN=CMA1 PE=1 SV=1                                                               | 0.64 | 0.60 | 88.20  | 6108504.4 | 3 | 1 | 0 | 0.80  | 249  | 34    |
| >tr A0A5F4C0S7 A0A5F4C0S7_CANLF HEAT repeat containing 5A OS=Canis lupus familiaris OX=9615 GN=HEATR5A PE=3 SV=1                                | 0.22 | 0.12 | 108.60 | 6105671.2 | 6 | 1 | 0 | 0.25  | 1995 | 1753  |
| >tr E2RPK8 E2RPK8_CANLF Phosphatidylethanolamine binding protein 4 OS=Canis lupus familiaris OX=9615 GN=PEBP4 PE=3 SV=2                         | 0.30 | 0.30 | 223.50 | 6067453.6 | 1 | 1 | 0 | 2.02  | 247  | 4725  |
| >tr A0A5F4DDT5 A0A5F4DDT5_CANLF Tousled like kinase 1 OS=Canis lupus familiaris OX=9615 GN=TLK1 PE=4 SV=1                                       | 0.36 | 0.36 | 162.40 | 6061049.9 | 1 | 1 | 0 | 0.68  | 734  | 7453  |
| >tr A0A5F4D020 A0A5F4D020_CANLF VWFA domain-containing protein OS=Canis lupus familiaris OX=9615 PE=3 SV=1                                      | 0.10 | 0.00 | 145.40 | 5985029.3 | 1 | 1 | 0 | 1.00  | 798  | 27451 |
| >tr F1P8J6 F1P8J6_CANLF RNA helicase OS=Canis lupus familiaris OX=9615 GN=DDX55 PE=3 SV=3                                                       | 0.10 | 0.00 | 141.70 | 5985029.3 | 1 | 1 | 0 | 1.58  | 568  | 8934  |
| >sp Q9TUX8 NOS3_CANLF Nitric oxide synthase, endothelial OS=Canis lupus familiaris OX=9615 GN=NOS3 PE=2 SV=1                                    | 0.10 | 0.03 | 216.90 | 5952588.6 | 1 | 1 | 0 | 0.25  | 1205 | 117   |
| >sp P49822 ALBU_CANLF Albumin OS=Canis lupus familiaris OX=9615 GN=ALB PE=1 SV=3                                                                | 0.35 | 0.35 | 182.50 | 5910507.1 | 1 | 1 | 0 | 1.64  | 608  | 490   |
| >tr A0A5F4D9L3 A0A5F4D9L3_CANLF Plexin C1 OS=Canis lupus familiaris OX=9615 GN=PLXNC1 PE=3 SV=1                                                 | 0.10 | 0.00 | 172.80 | 5907173.8 | 1 | 1 | 0 | 0.19  | 1580 | 1260  |
| >tr A0A5F4CY61 A0A5F4CY61_CANLF 2-phospho-D-glycerate hydro-lyase OS=Canis lupus familiaris OX=9615 PE=3 SV=1                                   | 0.10 | 0.04 | 181.90 | 5887641.8 | 1 | 1 | 0 | 6.50  | 123  | 9061  |
| >tr A0A5F4CCD0 A0A5F4CCD0_CANLF Cysteine rich secretory protein 2 OS=Canis lupus familiaris OX=9615 GN=CRISP2 PE=3 SV=1                         | 0.10 | 0.07 | 152.90 | 5872668.4 | 1 | 1 | 0 | 2.25  | 311  | 11017 |
| >tr A0A5F4CZ62 A0A5F4CZ62_CANLF Dynein cytoplasmic 1 heavy chain 1 OS=Canis lupus familiaris OX=9615 GN=DYNC1H1 PE=3 SV=1                       | 0.10 | 0.03 | 206.60 | 5836740.3 | 1 | 1 | 0 | 0.07  | 4329 | 3271  |
| >tr A0A5F4CUI6 A0A5F4CUI6_CANLF NLR family pyrin domain containing 3 OS=Canis lupus familiaris OX=9615 GN=NLRP3 PE=3 SV=1                       | 0.24 | 0.25 | 76.20  | 5814371.9 | 1 | 1 | 1 | 0.89  | 1007 | 9702  |
| >tr E2RIV7 E2RIV7_CANLF Syntrophin alpha 1 OS=Canis lupus familiaris OX=9615 GN=SNTA1 PE=3 SV=3                                                 | 0.10 | 0.07 | 36.50  | 5810887.0 | 8 | 1 | 1 | 1.03  | 486  | 34454 |
| >tr E2R6E0 E2R6E0_CANLF Lipocln_cytosolic_FA-bd_dom domain-containing protein OS=Canis lupus familiaris OX=9615 GN=LCNL1 PE=3 SV=2              | 0.55 | 0.55 | 152.00 | 5795482.5 | 1 | 1 | 0 | 3.01  | 299  | 1932  |
| >tr E2RFH9 E2RFH9_CANLF RNA exonuclease 5 OS=Canis lupus familiaris OX=9615 GN=REXO5 PE=4 SV=3                                                  | 0.71 | 0.71 | 95.30  | 5782692.1 | 1 | 1 | 1 | 2.17  | 782  | 3811  |
| >tr A0A5F4D7Y5 A0A5F4D7Y5_CANLF Pleckstrin homology, MyTH4 and FERM domain containing H1 OS=Canis lupus familiaris OX=9615 GN=PLEKHH1 PE=4 SV=1 | 0.52 | 0.53 | 191.20 | 5769906.8 | 1 | 1 | 0 | 0.30  | 1342 | 5979  |
| >tr F1PHA9 F1PHA9_CANLF Motile sperm domain containing 2 OS=Canis lupus familiaris OX=9615 GN=MOSPD2 PE=4 SV=3                                  | 0.36 | 0.36 | 212.00 | 5751740.5 | 1 | 1 | 0 | 0.97  | 518  | 10201 |
| >tr A0A5F4C604 A0A5F4C604_CANLF Signal recognition particle 14 kDa protein OS=Canis lupus familiaris OX=9615 GN=SRP14 PE=3 SV=1                 | 0.29 | 0.29 | 137.10 | 5740770.1 | 1 | 1 | 0 | 5.50  | 109  | 19629 |
| >tr A0A5F4CWK7 A0A5F4CWK7_CANLF Ig-like domain-containing protein OS=Canis lupus familiaris OX=9615 PE=4 SV=1                                   | 2.46 | 2.42 | 346.40 | 5731538.2 | 3 | 1 | 1 | 17.00 | 100  | 33283 |
| >tr E2RPK8 E2RPK8_CANLF Phosphatidylethanolamine binding protein 4 OS=Canis lupus familiaris OX=9615 GN=PEBP4 PE=3 SV=2                         | 0.10 | 0.00 | 164.10 | 5710200.2 | 1 | 1 | 0 | 2.02  | 247  | 4725  |
| >sp P21842 CMA1_CANLF Chymase OS=Canis lupus familiaris OX=9615 GN=CMA1 PE=1 SV=1                                                               | 0.54 | 0.52 | 79.90  | 5638895.1 | 2 | 1 | 0 | 0.80  | 249  | 34    |

|                                                                                                                                       |       |      |        |           |    |   |   |       |      |       |
|---------------------------------------------------------------------------------------------------------------------------------------|-------|------|--------|-----------|----|---|---|-------|------|-------|
| >tr E2RG75 E2RG75_CANLF Inactive ribonuclease-like protein 9 OS=Canis lupus familiaris OX=9615 GN=RNASE9 PE=3 SV=2                    | 2.93  | 1.97 | 361.40 | 5556511.4 | 2  | 2 | 1 | 4.55  | 198  | 41734 |
| >tr A0A5F4CQ96 A0A5F4CQ96_CANLF ATP binding cassette subfamily G member 8 OS=Canis lupus familiaris OX=9615 GN=ABCG8 PE=3 SV=1        | 0.10  | 0.03 | 163.80 | 5491250.2 | 1  | 1 | 0 | 1.84  | 707  | 17201 |
| >tr F1Q419 F1Q419_CANLF URB1 ribosome biogenesis homolog OS=Canis lupus familiaris OX=9615 GN=URB1 PE=4 SV=2                          | 0.99  | 1.00 | 215.00 | 5484906.9 | 1  | 1 | 0 | 0.40  | 2277 | 6033  |
| >tr F1PLW8 F1PLW8_CANLF CUB and Sushi multiple domains 3 OS=Canis lupus familiaris OX=9615 GN=CSMD3 PE=4 SV=2                         | 0.10  | 0.00 | 118.50 | 5474559.1 | 1  | 1 | 1 | 0.24  | 3707 | 17762 |
| >tr A0A5F4DHH0 A0A5F4DHH0_CANLF ATP binding cassette subfamily A member 1 OS=Canis lupus familiaris OX=9615 GN=ABCA1 PE=4 SV=1        | 0.48  | 0.46 | 73.20  | 5472409.6 | 2  | 1 | 0 | 0.23  | 2175 | 3709  |
| >tr A0A5F4DGF5 A0A5F4DGF5_CANLF Alkaline phosphatase OS=Canis lupus familiaris OX=9615 GN=ALPL PE=3 SV=1                              | 1.54  | 1.54 | 195.00 | 5468783.8 | 1  | 1 | 0 | 2.45  | 572  | 6357  |
| >tr A0A5F4BXB8 A0A5F4BXB8_CANLF Vacuolar protein sorting 13 homolog A OS=Canis lupus familiaris OX=9615 GN=VPS13A PE=3 SV=1           | 0.12  | 0.13 | 85.20  | 5464980.8 | 1  | 1 | 1 | 0.38  | 2859 | 6548  |
| >tr E2RSI6 E2RSI6_CANLF Ezrin OS=Canis lupus familiaris OX=9615 GN=EZR PE=4 SV=1                                                      | 0.10  | 0.00 | 152.80 | 5439995.0 | 1  | 1 | 0 | 1.54  | 586  | 15650 |
| >tr E2RN16 E2RN16_CANLF Mitogen-activated protein kinase kinase kinase 2 OS=Canis lupus familiaris OX=9615 GN=MAP3K2 PE=4 SV=2        | 0.28  | 0.28 | 139.30 | 5439652.6 | 1  | 1 | 0 | 0.97  | 620  | 34325 |
| >tr A0A5F4C3M5 A0A5F4C3M5_CANLF IQ motif containing GTPase activating protein 2 OS=Canis lupus familiaris OX=9615 GN=IQGAP2 PE=4 SV=1 | 0.53  | 0.53 | 36.10  | 5414616.0 | 1  | 1 | 0 | 0.38  | 1577 | 1056  |
| >tr A0A5F4BT89 A0A5F4BT89_CANLF Olfactory receptor OS=Canis lupus familiaris OX=9615 GN=OR5W6 PE=3 SV=1                               | 0.10  | 0.00 | 163.90 | 5372311.7 | 1  | 1 | 1 | 6.95  | 302  | 29923 |
| >sp Q28895 NPC2_CANLF NPC intracellular cholesterol transporter 2 OS=Canis lupus familiaris OX=9615 GN=NPC2 PE=2 SV=1                 | 10.08 | 5.44 | 477.30 | 5371042.8 | 36 | 3 | 0 | 30.20 | 149  | 153   |
| >tr E2RS98 E2RS98_CANLF Kinesin-like protein OS=Canis lupus familiaris OX=9615 GN=KIF18B PE=3 SV=3                                    | 0.10  | 0.03 | 42.30  | 5370355.7 | 1  | 1 | 0 | 0.70  | 856  | 29529 |
| >tr F1PB79 F1PB79_CANLF Abhydrolase domain containing 12B OS=Canis lupus familiaris OX=9615 GN=ABHD12B PE=4 SV=3                      | 0.10  | 0.02 | 224.10 | 5354930.4 | 1  | 1 | 0 | 2.87  | 349  | 30573 |
| >tr A0A5F4DJM5 A0A5F4DJM5_CANLF Tyrosine-protein phosphatase non-receptor type OS=Canis lupus familiaris OX=9615 GN=PTPN21 PE=3 SV=1  | 0.10  | 0.03 | 151.90 | 5333927.0 | 1  | 1 | 0 | 0.55  | 1096 | 5460  |
| >tr A0A5F4D6G2 A0A5F4D6G2_CANLF SMG7 nonsense mediated mRNA decay factor OS=Canis lupus familiaris OX=9615 GN=SMG7 PE=4 SV=1          | 0.76  | 0.76 | 235.50 | 5319387.2 | 1  | 1 | 0 | 0.43  | 1175 | 2075  |
| >tr F1PRU0 F1PRU0_CANLF WD_REPEATS_REGION domain-containing protein OS=Canis lupus familiaris OX=9615 GN=TLE7 PE=3 SV=2               | 0.14  | 0.12 | 58.00  | 5298983.1 | 2  | 1 | 0 | 1.16  | 431  | 22849 |
| >tr F1P721 F1P721_CANLF Kinase suppressor of ras 2 OS=Canis lupus familiaris OX=9615 GN=KSR2 PE=4 SV=3                                | 0.14  | 0.12 | 58.00  | 5298983.1 | 2  | 1 | 0 | 0.53  | 950  | 2276  |
| >tr F6PKZ1 F6PKZ1_CANLF Arylsulfatase A OS=Canis lupus familiaris OX=9615 GN=ARSA PE=3 SV=2                                           | 0.10  | 0.00 | 144.60 | 5287670.8 | 1  | 1 | 0 | 2.26  | 487  | 20206 |
| >tr F1PBU5 F1PBU5_CANLF Non-specific serine/threonine protein kinase OS=Canis lupus familiaris OX=9615 GN=SMG1 PE=3 SV=3              | 0.63  | 0.63 | 114.80 | 5257953.9 | 1  | 1 | 0 | 0.08  | 3634 | 6898  |
| >tr A0A5F4C2X8 A0A5F4C2X8_CANLF Fibrosin like 1 OS=Canis lupus familiaris OX=9615 GN=FBRSL1 PE=4 SV=1                                 | 0.10  | 0.00 | 142.50 | 5229332.9 | 1  | 1 | 0 | 0.71  | 985  | 1104  |
| >tr F1PD69 F1PD69_CANLF RING-type E3 ubiquitin transferase OS=Canis lupus familiaris OX=9615 GN=ZNRF3 PE=3 SV=2                       | 0.10  | 0.03 | 214.50 | 5227219.4 | 1  | 1 | 0 | 1.21  | 827  | 33223 |
| >sp Q5I2M8 TLR9_CANLF Toll-like receptor 9 OS=Canis lupus familiaris OX=9615 GN=TLR9 PE=2 SV=1                                        | 0.43  | 0.43 | 140.20 | 5220431.7 | 1  | 1 | 0 | 1.16  | 1032 | 382   |

|                                                                                                                                         |      |      |        |           |    |   |   |       |      |       |
|-----------------------------------------------------------------------------------------------------------------------------------------|------|------|--------|-----------|----|---|---|-------|------|-------|
| >tr A0A5F4CCF5 A0A5F4CCF5_CANLF Interleukin 6 signal transducer OS=Canis lupus familiaris OX=9615 GN=IL6ST PE=4 SV=1                    | 0.10 | 0.00 | 40.10  | 5178907.0 | 1  | 1 | 0 | 34.85 | 66   | 3968  |
| >tr F1PGK9 F1PGK9_CANLF ADAM metallopeptidase with thrombospondin type 1 motif 5 OS=Canis lupus familiaris OX=9615 GN=ADAMTS5 PE=4 SV=3 | 0.10 | 0.06 | 50.60  | 5178752.8 | 3  | 1 | 0 | 0.59  | 845  | 11956 |
| >tr E2R8N9 E2R8N9_CANLF WD repeat domain 87 OS=Canis lupus familiaris OX=9615 GN=WDR87 PE=4 SV=3                                        | 0.10 | 0.06 | 155.60 | 5147049.2 | 1  | 1 | 0 | 0.32  | 2806 | 14637 |
| >tr F1PS54 F1PS54_CANLF MFS domain-containing protein OS=Canis lupus familiaris OX=9615 GN=SLC17A3 PE=4 SV=3                            | 0.75 | 0.75 | 97.00  | 5127813.2 | 1  | 1 | 1 | 7.71  | 493  | 988   |
| >tr A0A5F4DJV1 A0A5F4DJV1_CANLF ATP synthase subunit beta OS=Canis lupus familiaris OX=9615 GN=ATP5F1B PE=3 SV=1                        | 0.10 | 0.00 | 106.50 | 5126973.0 | 1  | 1 | 0 | 2.42  | 619  | 6667  |
| >tr Q9XSV4 Q9XSV4_CANLF CE10 protein OS=Canis lupus familiaris OX=9615 GN=ce10 PE=2 SV=1                                                | 2.03 | 1.26 | 210.30 | 5124275.7 | 30 | 2 | 0 | 9.09  | 110  | 41542 |
| >sp P49822 ALBU_CANLF Albumin OS=Canis lupus familiaris OX=9615 GN=ALB PE=1 SV=3                                                        | 0.10 | 0.00 | 145.50 | 5102735.0 | 1  | 1 | 0 | 1.64  | 608  | 490   |
| >tr A0A5F4CUD4 A0A5F4CUD4_CANLF Transcription initiation factor TFIID subunit OS=Canis lupus familiaris OX=9615 GN=TAF1 PE=3 SV=1       | 0.10 | 0.06 | 24.70  | 5096037.9 | 1  | 1 | 0 | 0.26  | 1897 | 4265  |
| >tr J9P870 J9P870_CANLF Insulin like growth factor binding protein 6 OS=Canis lupus familiaris OX=9615 GN=IGFBP6 PE=4 SV=2              | 0.16 | 0.16 | 98.30  | 5066264.0 | 1  | 1 | 0 | 4.29  | 303  | 29295 |
| >tr E2RT65 E2RT65_CANLF Phosphoglycerate mutase OS=Canis lupus familiaris OX=9615 GN=PI4K2A PE=3 SV=2                                   | 0.10 | 0.03 | 230.30 | 5052692.6 | 1  | 1 | 0 | 4.33  | 254  | 15155 |
| >tr F1PX00 F1PX00_CANLF Transmembrane and coiled-coil domain family 3 OS=Canis lupus familiaris OX=9615 GN=TMCC3 PE=3 SV=2              | 0.12 | 0.12 | 76.50  | 5051932.0 | 1  | 1 | 0 | 4.43  | 451  | 8778  |
| >tr E2R1V3 E2R1V3_CANLF U2 snRNP associated SURP domain containing OS=Canis lupus familiaris OX=9615 GN=U2SURP PE=4 SV=3                | 0.12 | 0.12 | 146.00 | 5019941.6 | 1  | 1 | 0 | 0.78  | 1029 | 12656 |
| >tr E2RE16 E2RE16_CANLF Non-specific serine/threonine protein kinase OS=Canis lupus familiaris OX=9615 GN=PAK4 PE=4 SV=1                | 0.16 | 0.02 | 48.50  | 5005744.2 | 22 | 1 | 0 | 0.84  | 592  | 12735 |
| >tr A0A5F4CW57 A0A5F4CW57_CANLF Alsin Rho guanine nucleotide exchange factor ALS2 OS=Canis lupus familiaris OX=9615 GN=ALS2 PE=4 SV=1   | 0.10 | 0.02 | 125.00 | 4998044.8 | 1  | 1 | 0 | 1.31  | 1523 | 1985  |
| >tr J9NTP3 J9NTP3_CANLF Protein tyrosine phosphatase mitochondrial 1 OS=Canis lupus familiaris OX=9615 GN=PTPMT1 PE=4 SV=1              | 0.35 | 0.35 | 132.30 | 4991333.5 | 1  | 1 | 0 | 1.82  | 275  | 3704  |
| >tr A0A5F4C0S7 A0A5F4C0S7_CANLF HEAT repeat containing 5A OS=Canis lupus familiaris OX=9615 GN=HEATR5A PE=3 SV=1                        | 0.38 | 0.38 | 151.20 | 4982510.0 | 1  | 1 | 0 | 0.30  | 1995 | 1753  |
| >tr A0A5F4CQH1 A0A5F4CQH1_CANLF Na(+)/H(+) exchange regulatory cofactor NHE-RF OS=Canis lupus familiaris OX=9615 GN=SLC9A3R1 PE=4 SV=1  | 0.10 | 0.01 | 163.60 | 4945695.2 | 1  | 1 | 0 | 2.23  | 359  | 1876  |
| >tr A0A5F4CT13 A0A5F4CT13_CANLF Anion exchange protein OS=Canis lupus familiaris OX=9615 GN=SLC4A2 PE=3 SV=1                            | 0.10 | 0.00 | 97.30  | 4850691.2 | 1  | 1 | 0 | 1.50  | 1263 | 4624  |
| >tr A0A5F4D3E3 A0A5F4D3E3_CANLF Poly [ADP-ribose] polymerase OS=Canis lupus familiaris OX=9615 GN=PARP2 PE=4 SV=1                       | 0.10 | 0.03 | 56.30  | 4850691.2 | 1  | 1 | 0 | 2.16  | 602  | 5219  |
| >tr A0A5F4DJ83 A0A5F4DJ83_CANLF DExH-box helicase 57 OS=Canis lupus familiaris OX=9615 GN=DHX57 PE=4 SV=1                               | 1.09 | 1.07 | 168.40 | 4849595.7 | 2  | 1 | 0 | 0.64  | 1411 | 5166  |
| >tr A0A5F4D9N8 A0A5F4D9N8_CANLF Procollagen-lysine,2-oxoglutarate 5-dioxygenase 3 OS=Canis lupus familiaris OX=9615 GN=PLOD3 PE=4 SV=1  | 0.16 | 0.16 | 53.30  | 4849194.1 | 1  | 1 | 0 | 2.17  | 785  | 1958  |
| >tr E2RIV7 E2RIV7_CANLF Syntrophin alpha 1 OS=Canis lupus familiaris OX=9615 GN=SNTA1 PE=3 SV=3                                         | 0.10 | 0.02 | 41.30  | 4832783.8 | 13 | 1 | 1 | 1.03  | 486  | 34454 |

|                                                                                                                                                          |      |      |        |           |    |   |   |       |      |       |
|----------------------------------------------------------------------------------------------------------------------------------------------------------|------|------|--------|-----------|----|---|---|-------|------|-------|
| >tr A0A5F4CCD0 A0A5F4CCD0_CANLF Cysteine rich secretory protein 2 OS=Canis lupus familiaris OX=9615 GN=CRISP2 PE=3 SV=1                                  | 0.30 | 0.30 | 170.40 | 4780781.6 | 1  | 1 | 0 | 2.25  | 311  | 11017 |
| >tr A0A5F4CDD9 A0A5F4CDD9_CANLF Proline dehydrogenase OS=Canis lupus familiaris OX=9615 GN=PRODH2 PE=3 SV=1                                              | 0.10 | 0.01 | 183.80 | 4763870.7 | 1  | 1 | 1 | 1.69  | 415  | 14972 |
| >sp Q9XS65 PTGDS_CANLF Prostaglandin-H2 D-isomerase OS=Canis lupus familiaris OX=9615 GN=PTGDS PE=2 SV=1                                                 | 0.42 | 0.42 | 169.80 | 4721122.2 | 1  | 1 | 0 | 3.14  | 191  | 165   |
| >tr A0A5F4BT89 A0A5F4BT89_CANLF Olfactory receptor OS=Canis lupus familiaris OX=9615 GN=OR5W6 PE=3 SV=1                                                  | 0.10 | 0.02 | 175.30 | 4715258.3 | 1  | 1 | 1 | 6.95  | 302  | 29923 |
| >tr J9P434 J9P434_CANLF Myotubularin related protein 14 OS=Canis lupus familiaris OX=9615 GN=MTMR14 PE=4 SV=2                                            | 0.10 | 0.00 | 140.50 | 4695683.5 | 1  | 1 | 0 | 1.51  | 596  | 17413 |
| >tr A0A5F4D6G2 A0A5F4D6G2_CANLF SMG7 nonsense mediated mRNA decay factor OS=Canis lupus familiaris OX=9615 GN=SMG7 PE=4 SV=1                             | 0.19 | 0.19 | 193.40 | 4676067.7 | 1  | 1 | 0 | 0.43  | 1175 | 2075  |
| >tr E2R6E0 E2R6E0_CANLF Lipocln_cytosolic_FA-bd_dom domain-containing protein OS=Canis lupus familiaris OX=9615 GN=LCNL1 PE=3 SV=2                       | 0.89 | 0.89 | 125.80 | 4617242.5 | 1  | 1 | 0 | 3.01  | 299  | 1932  |
| >tr J9NSS6 J9NSS6_CANLF DNA helicase OS=Canis lupus familiaris OX=9615 GN=CHD2 PE=4 SV=2                                                                 | 0.10 | 0.08 | 70.00  | 4569948.7 | 6  | 1 | 0 | 0.28  | 1780 | 1264  |
| >tr J9NSS6 J9NSS6_CANLF DNA helicase OS=Canis lupus familiaris OX=9615 GN=CHD2 PE=4 SV=2                                                                 | 0.25 | 0.02 | 65.60  | 4531674.9 | 21 | 1 | 0 | 0.28  | 1780 | 1264  |
| >sp Q28279 CNGA1_CANLF cGMP-gated cation channel alpha-1 OS=Canis lupus familiaris OX=9615 GN=CNGA1 PE=2 SV=1                                            | 0.36 | 0.34 | 164.90 | 4503656.9 | 2  | 1 | 0 | 0.58  | 691  | 455   |
| >tr F1PJ71 F1PJ71_CANLF Glutathione peroxidase OS=Canis lupus familiaris OX=9615 GN=GPX5 PE=3 SV=2                                                       | 0.63 | 0.57 | 215.90 | 4480646.2 | 4  | 1 | 1 | 6.33  | 221  | 19009 |
| >tr J9PAF1 J9PAF1_CANLF Actin binding LIM protein family member 2 OS=Canis lupus familiaris OX=9615 GN=ABLM2 PE=4 SV=2                                   | 0.50 | 0.50 | 119.60 | 4474940.0 | 1  | 1 | 0 | 1.71  | 645  | 4331  |
| >tr A0A5F4D9S5 A0A5F4D9S5_CANLF Hyaluronoglucosaminidase OS=Canis lupus familiaris OX=9615 GN=CEMIP PE=3 SV=1                                            | 0.55 | 0.55 | 187.30 | 4458486.7 | 1  | 1 | 0 | 0.24  | 1684 | 9775  |
| >tr F1PI09 F1PI09_CANLF Aldehyde oxidase OS=Canis lupus familiaris OX=9615 GN=AOX2 PE=3 SV=3                                                             | 0.41 | 0.41 | 174.50 | 4453249.7 | 1  | 1 | 0 | 0.67  | 1347 | 21650 |
| >tr J9P7Y2 J9P7Y2_CANLF Angiotensin-converting enzyme OS=Canis lupus familiaris OX=9615 GN=ACE2 PE=3 SV=1                                                | 0.80 | 0.80 | 53.60  | 4424277.3 | 1  | 1 | 0 | 1.62  | 804  | 1041  |
| >tr J9NRV0 J9NRV0_CANLF Histone H4 OS=Canis lupus familiaris OX=9615 GN=H4C11 PE=3 SV=2                                                                  | 0.14 | 0.14 | 123.30 | 4411893.1 | 1  | 1 | 1 | 21.78 | 101  | 7932  |
| >tr A0A5F4DCA4 A0A5F4DCA4_CANLF Reverse transcriptase domain-containing protein OS=Canis lupus familiaris OX=9615 PE=4 SV=1                              | 0.28 | 0.28 | 149.70 | 4405126.8 | 1  | 1 | 0 | 0.31  | 978  | 860   |
| >tr A0A5F4CAT6 A0A5F4CAT6_CANLF Centromere protein I OS=Canis lupus familiaris OX=9615 GN=CENPI PE=3 SV=1                                                | 0.17 | 0.17 | 86.80  | 4393225.8 | 1  | 1 | 1 | 1.29  | 699  | 20654 |
| >tr F1PL17 F1PL17_CANLF TNF receptor superfamily member 13C OS=Canis lupus familiaris OX=9615 GN=TNFRSF13C PE=4 SV=3                                     | 0.55 | 0.55 | 93.70  | 4386567.6 | 1  | 1 | 0 | 3.15  | 286  | 13040 |
| >tr A0A5F4D7J3 A0A5F4D7J3_CANLF Non-specific serine/threonine protein kinase OS=Canis lupus familiaris OX=9615 GN=CDC42BPA PE=3 SV=1                     | 0.80 | 0.80 | 183.60 | 4334414.5 | 1  | 1 | 0 | 0.22  | 1794 | 1069  |
| >tr F1PKW7 F1PKW7_CANLF Tyrosine 3-monooxygenase/tryptophan 5-monooxygenase activation protein beta OS=Canis lupus familiaris OX=9615 GN=YWHAB PE=3 SV=3 | 0.10 | 0.02 | 205.20 | 4326583.6 | 1  | 1 | 0 | 2.03  | 246  | 2992  |
| >tr F1PJA4 F1PJA4_CANLF Phospholipid-transporting ATPase OS=Canis lupus familiaris OX=9615 GN=ATP8B4 PE=3 SV=3                                           | 0.27 | 0.27 | 130.50 | 4266179.6 | 1  | 1 | 0 | 0.50  | 1191 | 2739  |

|                                                                                                                                            |      |      |        |           |   |   |   |      |      |       |
|--------------------------------------------------------------------------------------------------------------------------------------------|------|------|--------|-----------|---|---|---|------|------|-------|
| >sp Q9GL25 ESPBI_CANLF Epididymal sperm-binding protein 1 OS=Canis lupus familiaris OX=9615 GN=ELSPBP1 PE=1 SV=1                           | 1.76 | 1.74 | 182.30 | 4263954.6 | 2 | 1 | 0 | 4.49 | 245  | 36    |
| >tr F1PTL9 F1PTL9_CANLF ATP binding cassette subfamily C member 8 OS=Canis lupus familiaris OX=9615 GN=ABCC8 PE=3 SV=3                     | 0.10 | 0.02 | 191.90 | 4114660.3 | 1 | 1 | 0 | 0.28 | 1454 | 4249  |
| >tr F1PLU6 F1PLU6_CANLF Collagen type IX alpha 3 chain OS=Canis lupus familiaris OX=9615 GN=COL9A3 PE=4 SV=3                               | 0.43 | 0.43 | 13.00  | 4063872.4 | 1 | 1 | 0 | 6.01 | 416  | 18705 |
| >tr A0A5F4DCW5 A0A5F4DCW5_CANLF Fibrosin like 1 OS=Canis lupus familiaris OX=9615 GN=FBRSL1 PE=4 SV=1                                      | 0.53 | 0.52 | 43.80  | 3992072.6 | 2 | 2 | 2 | 2.30 | 566  | 32781 |
| >tr A0A5F4DGF5 A0A5F4DGF5_CANLF Alkaline phosphatase OS=Canis lupus familiaris OX=9615 GN=ALPL PE=3 SV=1                                   | 0.36 | 0.36 | 142.30 | 3954869.0 | 1 | 1 | 0 | 2.45 | 572  | 6357  |
| >tr A0A5F4C1S8 A0A5F4C1S8_CANLF E3 ubiquitin-protein ligase CBL OS=Canis lupus familiaris OX=9615 GN=CBL PE=4 SV=1                         | 0.66 | 0.67 | 88.50  | 3945452.0 | 1 | 1 | 0 | 0.39 | 773  | 1308  |
| >tr A0A5F4BX58 A0A5F4BX58_CANLF Transcription termination factor 1 OS=Canis lupus familiaris OX=9615 GN=TTF1 PE=4 SV=1                     | 0.76 | 0.74 | 214.70 | 3896328.8 | 2 | 1 | 0 | 0.59 | 677  | 12089 |
| >tr A0A5F4DL64 A0A5F4DL64_CANLF Tyrosine-protein kinase receptor OS=Canis lupus familiaris OX=9615 GN=ROS1 PE=3 SV=1                       | 0.10 | 0.00 | 143.30 | 3787080.6 | 1 | 1 | 0 | 0.22 | 2272 | 14391 |
| >tr F1PJY1 F1PJY1_CANLF Mannosyl-glycoprotein endo-beta-N-acetylglucosaminidase OS=Canis lupus familiaris OX=9615 GN=ENGASE PE=3 SV=3      | 0.10 | 0.04 | 137.40 | 3758465.7 | 2 | 1 | 1 | 1.74 | 690  | 32761 |
| >tr A0A5F4CQ96 A0A5F4CQ96_CANLF ATP binding cassette subfamily G member 8 OS=Canis lupus familiaris OX=9615 GN=ABCG8 PE=3 SV=1             | 0.18 | 0.18 | 173.10 | 3723762.9 | 1 | 1 | 0 | 1.84 | 707  | 17201 |
| >tr A0A5F4CNP4 A0A5F4CNP4_CANLF ADP ribosylation factor GTPase activating protein 3 OS=Canis lupus familiaris OX=9615 GN=ARFGAP3 PE=4 SV=1 | 0.57 | 0.57 | 188.60 | 3707457.0 | 1 | 1 | 0 | 1.12 | 714  | 964   |
| >tr J9P432 J9P432_CANLF Glutamine--fructose-6-phosphate transaminase (isomerizing) OS=Canis lupus familiaris OX=9615 GN=GFPT1 PE=4 SV=2    | 0.46 | 0.44 | 89.40  | 3651746.4 | 2 | 1 | 0 | 1.18 | 677  | 7191  |
| >tr A0A5F4D9S5 A0A5F4D9S5_CANLF Hyaluronoglucosaminidase OS=Canis lupus familiaris OX=9615 GN=CEMIP PE=3 SV=1                              | 0.97 | 0.97 | 187.80 | 3577467.9 | 1 | 1 | 0 | 0.24 | 1684 | 9775  |
| >tr A0A5F4DCA4 A0A5F4DCA4_CANLF Reverse transcriptase domain-containing protein OS=Canis lupus familiaris OX=9615 PE=4 SV=1                | 0.54 | 0.54 | 128.70 | 3560066.5 | 1 | 1 | 0 | 0.31 | 978  | 860   |
| >sp Q9XSU7 RL27_CANLF 60S ribosomal protein L27 OS=Canis lupus familiaris OX=9615 GN=RPL27 PE=2 SV=3                                       | 0.10 | 0.04 | 16.80  | 3548887.2 | 1 | 1 | 0 | 3.68 | 136  | 314   |
| >tr F1PJ71 F1PJ71_CANLF Glutathione peroxidase OS=Canis lupus familiaris OX=9615 GN=GPX5 PE=3 SV=2                                         | 0.43 | 0.42 | 167.10 | 3548106.6 | 3 | 1 | 1 | 6.33 | 221  | 19009 |
| >tr A0A5F4CK78 A0A5F4CK78_CANLF NIMA related kinase 9 OS=Canis lupus familiaris OX=9615 GN=NEK9 PE=3 SV=1                                  | 0.17 | 0.15 | 114.30 | 3538761.4 | 2 | 1 | 0 | 1.25 | 1040 | 34954 |
| >tr A0A5F4DKH0 A0A5F4DKH0_CANLF Multifunctional fusion protein OS=Canis lupus familiaris OX=9615 GN=PARP6 PE=3 SV=1                        | 0.82 | 0.80 | 125.30 | 3513288.8 | 2 | 1 | 0 | 0.45 | 1112 | 1413  |
| >tr E2RHC5 E2RHC5_CANLF Baculoviral IAP repeat containing 7 OS=Canis lupus familiaris OX=9615 GN=BIRC7 PE=3 SV=3                           | 0.10 | 0.06 | 139.80 | 3491016.8 | 2 | 1 | 0 | 2.95 | 271  | 10900 |
| >tr F1PGK9 F1PGK9_CANLF ADAM metalloproteinase with thrombospondin type 1 motif 5 OS=Canis lupus familiaris OX=9615 GN=ADAMTS5 PE=4 SV=3   | 0.10 | 0.02 | 41.00  | 3440320.3 | 9 | 1 | 0 | 0.59 | 845  | 11956 |
| >tr E2RTL2 E2RTL2_CANLF Tubulin tyrosine ligase like 6 OS=Canis lupus familiaris OX=9615 GN=TTLL6 PE=4 SV=3                                | 0.17 | 0.17 | 50.00  | 3278214.6 | 1 | 1 | 0 | 0.60 | 827  | 2703  |
| >tr F1PIW3 F1PIW3_CANLF Dynein axonemal heavy chain 14 OS=Canis lupus familiaris OX=9615 GN=DNAH14 PE=3 SV=3                               | 0.11 | 0.10 | 69.60  | 3274474.5 | 2 | 1 | 1 | 0.16 | 4491 | 30490 |

|                                                                                                                                                 |      |      |        |           |    |   |   |       |      |       |
|-------------------------------------------------------------------------------------------------------------------------------------------------|------|------|--------|-----------|----|---|---|-------|------|-------|
| >tr A0A5F4C289 A0A5F4C289_CANLF Netrin receptor UNC5 OS=Canis lupus familiaris OX=9615 GN=UNC5D PE=3 SV=1                                       | 0.14 | 0.14 | 43.70  | 3257952.1 | 1  | 1 | 1 | 1.80  | 945  | 14524 |
| >tr J9NUT9 J9NUT9_CANLF Pericentrin OS=Canis lupus familiaris OX=9615 GN=PCNT PE=4 SV=2                                                         | 0.74 | 0.74 | 196.70 | 3227068.8 | 1  | 1 | 0 | 0.19  | 3208 | 18609 |
| >tr E2RA12 E2RA12_CANLF PH domain and leucine rich repeat protein phosphatase 2 OS=Canis lupus familiaris OX=9615 GN=PHLPP2 PE=4 SV=3           | 0.16 | 0.16 | 123.80 | 3110773.8 | 1  | 1 | 1 | 0.44  | 1351 | 11085 |
| >tr A0A5F4DBL7 A0A5F4DBL7_CANLF LDL receptor related protein 1 OS=Canis lupus familiaris OX=9615 GN=LRP1 PE=3 SV=1                              | 0.42 | 0.42 | 32.60  | 3070857.8 | 1  | 1 | 0 | 0.22  | 4133 | 14011 |
| >tr E2RRF5 E2RRF5_CANLF RNA binding motif protein 19 OS=Canis lupus familiaris OX=9615 GN=RBM19 PE=4 SV=3                                       | 0.13 | 0.11 | 43.30  | 3068568.4 | 2  | 1 | 0 | 0.41  | 970  | 905   |
| >tr A0A5F4CEM0 A0A5F4CEM0_CANLF Proline rich coiled-coil 2B OS=Canis lupus familiaris OX=9615 GN=PRRC2B PE=4 SV=1                               | 0.10 | 0.02 | 142.50 | 2893515.9 | 7  | 1 | 1 | 0.58  | 2235 | 37089 |
| >tr J9P432 J9P432_CANLF Glutamine--fructose-6-phosphate transaminase (isomerizing) OS=Canis lupus familiaris OX=9615 GN=GFPT1 PE=4 SV=2         | 0.71 | 0.71 | 67.80  | 2882998.9 | 1  | 1 | 0 | 1.18  | 677  | 7191  |
| >tr F1PBU5 F1PBU5_CANLF Non-specific serine/threonine protein kinase OS=Canis lupus familiaris OX=9615 GN=SMG1 PE=3 SV=3                        | 0.23 | 0.23 | 171.60 | 2865115.3 | 1  | 1 | 0 | 0.08  | 3634 | 6898  |
| >tr A0A5F4CCY0 A0A5F4CCY0_CANLF Programmed cell death 11 OS=Canis lupus familiaris OX=9615 GN=PDCD11 PE=4 SV=1                                  | 0.60 | 0.50 | 65.10  | 2834526.4 | 7  | 1 | 0 | 0.16  | 1829 | 1406  |
| >sp Q9XS65 PTGDS_CANLF Prostaglandin-H2 D-isomerase OS=Canis lupus familiaris OX=9615 GN=PTGDS PE=2 SV=1                                        | 1.68 | 1.10 | 124.50 | 2819070.1 | 7  | 2 | 1 | 16.23 | 191  | 165   |
| >tr A0A5F4D7Y5 A0A5F4D7Y5_CANLF Pleckstrin homology, MyTH4 and FERM domain containing H1 OS=Canis lupus familiaris OX=9615 GN=PLEKHH1 PE=4 SV=1 | 0.10 | 0.06 | 128.30 | 2760122.0 | 1  | 1 | 0 | 0.30  | 1342 | 5979  |
| >tr F1PPP9 F1PPP9_CANLF Family with sequence similarity 135 member A OS=Canis lupus familiaris OX=9615 GN=FAM135A PE=3 SV=3                     | 0.58 | 0.59 | 34.40  | 2655858.4 | 1  | 1 | 0 | 1.22  | 1399 | 6815  |
| >tr J9P3H8 J9P3H8_CANLF ATM interactor OS=Canis lupus familiaris OX=9615 GN=ATMIN PE=4 SV=2                                                     | 0.16 | 0.02 | 49.40  | 2616877.9 | 12 | 1 | 0 | 0.58  | 863  | 882   |
| >tr A0A5F4D430 A0A5F4D430_CANLF Transcription factor AP-2 gamma OS=Canis lupus familiaris OX=9615 GN=TFAP2C PE=3 SV=1                           | 0.60 | 0.61 | 162.00 | 2499781.8 | 1  | 1 | 0 | 1.38  | 650  | 9642  |
| >tr A0A5F4D3Q2 A0A5F4D3Q2_CANLF Non-specific serine/threonine protein kinase OS=Canis lupus familiaris OX=9615 GN=ATR PE=3 SV=1                 | 0.10 | 0.03 | 112.80 | 2446716.1 | 1  | 1 | 0 | 0.35  | 2583 | 7077  |
| >tr E2R3M8 E2R3M8_CANLF Unc-93 homolog B1, TLR signaling regulator OS=Canis lupus familiaris OX=9615 GN=UNC93B1 PE=4 SV=2                       | 1.02 | 1.02 | 217.70 | 2435177.9 | 1  | 1 | 0 | 1.08  | 369  | 5718  |
| >tr A0A5F4DHH0 A0A5F4DHH0_CANLF ATP binding cassette subfamily A member 1 OS=Canis lupus familiaris OX=9615 GN=ABCA1 PE=4 SV=1                  | 0.10 | 0.02 | 39.00  | 2381312.6 | 7  | 1 | 0 | 0.23  | 2175 | 3709  |
| >tr A0A5F4CLU1 A0A5F4CLU1_CANLF Superoxide dismutase [Cu-Zn] OS=Canis lupus familiaris OX=9615 GN=SOD1 PE=3 SV=1                                | 0.35 | 0.35 | 143.80 | 2338204.7 | 1  | 1 | 0 | 7.09  | 141  | 25417 |
| >tr A0A5F4C1D8 A0A5F4C1D8_CANLF Acrosin OS=Canis lupus familiaris OX=9615 GN=ACR PE=3 SV=1                                                      | 0.44 | 0.44 | 175.10 | 2328870.8 | 2  | 1 | 0 | 2.84  | 423  | 43346 |
| >tr F1PI09 F1PI09_CANLF Aldehyde oxidase OS=Canis lupus familiaris OX=9615 GN=AOX2 PE=3 SV=3                                                    | 0.41 | 0.37 | 147.40 | 2327470.8 | 3  | 1 | 0 | 0.67  | 1347 | 21650 |
| >sp Q28894 WFDC2_CANLF WAP four-disulfide core domain protein 2 OS=Canis lupus familiaris OX=9615 GN=WFDC2 PE=2 SV=1                            | 1.79 | 1.77 | 348.70 | 2311834.0 | 2  | 1 | 0 | 6.45  | 124  | 53    |
| >tr A0A5F4CTR9 A0A5F4CTR9_CANLF Semaphorin 3A OS=Canis lupus familiaris OX=9615 GN=SEMA3A PE=3 SV=1                                             | 0.27 | 0.27 | 14.40  | 2298305.7 | 1  | 1 | 0 | 0.68  | 732  | 2791  |

|                                                                                                                                |      |      |        |           |    |   |   |      |      |       |
|--------------------------------------------------------------------------------------------------------------------------------|------|------|--------|-----------|----|---|---|------|------|-------|
| >tr F1PJ45 F1PJ45_CANLF Adhesion G protein-coupled receptor L3 OS=Canis lupus familiaris OX=9615 GN=ADGRL3 PE=4 SV=2           | 0.27 | 0.27 | 14.40  | 2298305.7 | 1  | 1 | 0 | 0.33 | 1528 | 2066  |
| >tr A0A5F4D8X3 A0A5F4D8X3_CANLF Solute carrier family 36 member 4 OS=Canis lupus familiaris OX=9615 GN=SLC36A4 PE=4 SV=1       | 0.58 | 0.58 | 17.70  | 2293612.5 | 1  | 1 | 0 | 3.70 | 459  | 15767 |
| >tr E2RG75 E2RG75_CANLF Inactive ribonuclease-like protein 9 OS=Canis lupus familiaris OX=9615 GN=RNASE9 PE=3 SV=2             | 0.84 | 0.82 | 353.00 | 2240387.0 | 2  | 1 | 1 | 4.55 | 198  | 41734 |
| >tr F1PPP9 F1PPP9_CANLF Family with sequence similarity 135 member A OS=Canis lupus familiaris OX=9615 GN=FAM135A PE=3 SV=3    | 0.72 | 0.70 | 99.10  | 2148188.2 | 2  | 1 | 0 | 1.22 | 1399 | 6815  |
| >tr A0A5F4C1D8 A0A5F4C1D8_CANLF Acrosin OS=Canis lupus familiaris OX=9615 GN=ACR PE=3 SV=1                                     | 0.45 | 0.43 | 254.50 | 2133176.8 | 2  | 1 | 0 | 2.84 | 423  | 43346 |
| >sp Q28279 CNGA1_CANLF cGMP-gated cation channel alpha-1 OS=Canis lupus familiaris OX=9615 GN=CNGA1 PE=2 SV=1                  | 0.89 | 0.89 | 213.50 | 2084821.0 | 1  | 1 | 0 | 0.58 | 691  | 455   |
| >tr F1PR54 F1PR54_CANLF Lactotransferrin OS=Canis lupus familiaris OX=9615 GN=LTF PE=3 SV=1                                    | 3.02 | 1.60 | 295.20 | 2081618.8 | 18 | 3 | 0 | 5.37 | 708  | 40436 |
| >sp P25473 CLUS_CANLF Clusterin OS=Canis lupus familiaris OX=9615 GN=CLU PE=2 SV=1                                             | 0.98 | 0.98 | 240.00 | 2016485.8 | 1  | 1 | 0 | 0.90 | 445  | 725   |
| >tr A0A5F4DCA4 A0A5F4DCA4_CANLF Reverse transcriptase domain-containing protein OS=Canis lupus familiaris OX=9615 PE=4 SV=1    | 1.26 | 1.26 | 176.40 | 1998374.1 | 1  | 1 | 0 | 0.31 | 978  | 860   |
| >tr A0A5F4CF26 A0A5F4CF26_CANLF S1 RNA binding domain 1 OS=Canis lupus familiaris OX=9615 GN=SRBD1 PE=4 SV=1                   | 0.10 | 0.00 | 40.00  | 1975157.3 | 2  | 1 | 0 | 0.50 | 1003 | 6216  |
| >tr A0A5F4CUE8 A0A5F4CUE8_CANLF Senataxin OS=Canis lupus familiaris OX=9615 GN=SETX PE=4 SV=1                                  | 0.11 | 0.11 | 133.20 | 1946556.2 | 1  | 1 | 0 | 0.26 | 2645 | 1796  |
| >sp Q9XT60 SRY_CANLF Sex-determining region Y protein OS=Canis lupus familiaris OX=9615 GN=SRY PE=3 SV=1                       | 0.29 | 0.29 | 89.50  | 1904460.7 | 1  | 1 | 0 | 3.18 | 220  | 347   |
| >tr A0A5F4CMY6 A0A5F4CMY6_CANLF Rho-associated protein kinase 2 OS=Canis lupus familiaris OX=9615 GN=ROCK2 PE=3 SV=1           | 0.10 | 0.00 | 82.40  | 1903807.5 | 2  | 1 | 0 | 0.35 | 1145 | 1527  |
| >tr A0A5F4C7Q7 A0A5F4C7Q7_CANLF IQ motif and Sec7 domain ArfGEF 1 OS=Canis lupus familiaris OX=9615 GN=IQSEC1 PE=3 SV=1        | 0.11 | 0.12 | 45.50  | 1862384.0 | 1  | 1 | 0 | 0.51 | 971  | 4269  |
| >tr A0A5F4DHH0 A0A5F4DHH0_CANLF ATP binding cassette subfamily A member 1 OS=Canis lupus familiaris OX=9615 GN=ABCA1 PE=4 SV=1 | 0.27 | 0.25 | 34.80  | 1829194.8 | 2  | 1 | 0 | 0.23 | 2175 | 3709  |
| >sp Q863Z4 MTPN_CANLF Myotrophin OS=Canis lupus familiaris OX=9615 GN=MTPN PE=3 SV=3                                           | 0.43 | 0.43 | 70.80  | 1791867.0 | 2  | 1 | 0 | 4.24 | 118  | 229   |
| >tr F1PI09 F1PI09_CANLF Aldehyde oxidase OS=Canis lupus familiaris OX=9615 GN=AOX2 PE=3 SV=3                                   | 0.13 | 0.13 | 88.30  | 1775376.8 | 1  | 1 | 0 | 0.67 | 1347 | 21650 |
| >tr J9PA70 J9PA70_CANLF Tigger transposable element derived 7 OS=Canis lupus familiaris OX=9615 GN=TIGD7 PE=3 SV=2             | 0.67 | 0.67 | 101.10 | 1765648.6 | 1  | 1 | 0 | 1.46 | 548  | 5607  |
| >tr F1Q2B6 F1Q2B6_CANLF Coiled-coil domain containing 57 OS=Canis lupus familiaris OX=9615 GN=CCDC57 PE=4 SV=3                 | 0.37 | 0.37 | 149.50 | 1719110.0 | 1  | 1 | 1 | 1.10 | 727  | 9706  |
| >tr F1PIJ6 F1PIJ6_CANLF Inorganic diphosphatase OS=Canis lupus familiaris OX=9615 GN=PPA1 PE=3 SV=3                            | 0.10 | 0.00 | 12.70  | 1613397.0 | 3  | 1 | 1 | 1.77 | 283  | 2594  |
| >sp Q9XT60 SRY_CANLF Sex-determining region Y protein OS=Canis lupus familiaris OX=9615 GN=SRY PE=3 SV=1                       | 0.27 | 0.27 | 11.70  | 1590369.1 | 1  | 1 | 0 | 2.27 | 220  | 347   |
| >tr J9P9J4 J9P9J4_CANLF Aldehyde dehydrogenase 1 family member A1 OS=Canis lupus familiaris OX=9615 GN=ALDH1A1 PE=3 SV=1       | 0.36 | 0.36 | 275.30 | 1566400.8 | 1  | 1 | 1 | 2.07 | 484  | 13765 |

|                                                                                                                                                                |      |      |        |           |   |   |   |       |      |       |
|----------------------------------------------------------------------------------------------------------------------------------------------------------------|------|------|--------|-----------|---|---|---|-------|------|-------|
| >tr E2RHV3 E2RHV3_CANLF Tripartite motif containing 23 OS=Canis lupus familiaris OX=9615 GN=TRIM23 PE=4 SV=3                                                   | 0.10 | 0.00 | 61.90  | 1484135.6 | 1 | 1 | 0 | 0.87  | 574  | 1124  |
| >sp A2IBY8 MIP_CANLF Lens fiber major intrinsic protein OS=Canis lupus familiaris OX=9615 GN=MIP PE=2 SV=1                                                     | 0.20 | 0.20 | 44.90  | 1412721.4 | 1 | 1 | 0 | 1.90  | 263  | 112   |
| >tr E2RI36 E2RI36_CANLF Nuclear transcription factor, X-box binding 1 OS=Canis lupus familiaris OX=9615 GN=NFX1 PE=3 SV=3                                      | 0.38 | 0.35 | 37.10  | 1382735.2 | 3 | 1 | 1 | 0.98  | 1118 | 13894 |
| >tr A0A5F4C5B9 A0A5F4C5B9_CANLF Glutathione S-transferase OS=Canis lupus familiaris OX=9615 GN=LOC481841 PE=3 SV=1                                             | 0.10 | 0.02 | 35.80  | 1151128.8 | 4 | 1 | 1 | 1.83  | 218  | 22818 |
| >sp O18840 ACTB_CANLF Actin, cytoplasmic 1 OS=Canis lupus familiaris OX=9615 GN=ACTB PE=2 SV=3                                                                 | 2.10 | 1.13 | 223.60 | 1148831.5 | 6 | 3 | 0 | 12.00 | 375  | 642   |
| >tr A0A5F4C2M0 A0A5F4C2M0_CANLF Rotatin OS=Canis lupus familiaris OX=9615 GN=RTTN PE=4 SV=1                                                                    | 0.20 | 0.20 | 75.60  | 1028978.0 | 1 | 1 | 0 | 0.18  | 2202 | 1797  |
| >sp P41148 ENPL_CANLF Endoplasmin OS=Canis lupus familiaris OX=9615 GN=HSP90B1 PE=1 SV=1                                                                       | 0.10 | 0.00 | 8.10   | 1005822.4 | 1 | 1 | 1 | 0.50  | 804  | 787   |
| >tr A0A5F4D0U7 A0A5F4D0U7_CANLF Structural maintenance of chromosomes flexible hinge domain containing 1 OS=Canis lupus familiaris OX=9615 GN=SMCHD1 PE=4 SV=1 | 0.35 | 0.35 | 84.80  | 977352.5  | 1 | 1 | 0 | 0.16  | 3051 | 9634  |
| >tr E2R9Y2 E2R9Y2_CANLF GB1/RHD3-type G domain-containing protein OS=Canis lupus familiaris OX=9615 GN=GBP1 PE=3 SV=3                                          | 0.39 | 0.35 | 70.40  | 955029.0  | 3 | 1 | 0 | 1.52  | 591  | 24472 |
| >tr E2RE16 E2RE16_CANLF Non-specific serine/threonine protein kinase OS=Canis lupus familiaris OX=9615 GN=PAK4 PE=4 SV=1                                       | 0.17 | 0.17 | 58.70  | 954967.4  | 1 | 1 | 0 | 0.84  | 592  | 12735 |
| >tr F1PPP9 F1PPP9_CANLF Family with sequence similarity 135 member A OS=Canis lupus familiaris OX=9615 GN=FAM135A PE=3 SV=3                                    | 0.49 | 0.50 | 114.10 | 933504.9  | 1 | 1 | 0 | 1.22  | 1399 | 6815  |
| >tr A0A5F4CEQ5 A0A5F4CEQ5_CANLF Steroid 11-beta-monooxygenase OS=Canis lupus familiaris OX=9615 GN=CYP11B2 PE=3 SV=1                                           | 0.57 | 0.57 | 10.50  | 915904.4  | 1 | 1 | 0 | 5.09  | 530  | 26732 |
| >tr A0A5F4DI80 A0A5F4DI80_CANLF Zinc finger protein Gfi-1 OS=Canis lupus familiaris OX=9615 GN=GFI1 PE=4 SV=1                                                  | 1.14 | 1.12 | 115.40 | 907642.9  | 2 | 1 | 1 | 0.99  | 912  | 9754  |
| >tr J9P3H8 J9P3H8_CANLF ATM interactor OS=Canis lupus familiaris OX=9615 GN=ATMIN PE=4 SV=2                                                                    | 0.25 | 0.25 | 18.90  | 861906.8  | 1 | 1 | 0 | 0.58  | 863  | 882   |
| >tr J9NT31 J9NT31_CANLF Thymocyte selection associated family member 2 OS=Canis lupus familiaris OX=9615 GN=THEMIS2 PE=3 SV=1                                  | 0.10 | 0.01 | 42.00  | 830275.7  | 1 | 1 | 0 | 0.78  | 642  | 9120  |
| >tr J9NXS4 J9NXS4_CANLF SIN3 transcription regulator family member B OS=Canis lupus familiaris OX=9615 GN=SIN3B PE=4 SV=2                                      | 0.29 | 0.29 | 23.90  | 821092.8  | 2 | 1 | 1 | 1.24  | 1125 | 28078 |
| >tr E2RCT1 E2RCT1_CANLF WAP domain-containing protein OS=Canis lupus familiaris OX=9615 PE=4 SV=2                                                              | 1.08 | 1.02 | 127.80 | 784291.3  | 4 | 1 | 0 | 14.66 | 116  | 21717 |
| >tr A0A5F4CEY4 A0A5F4CEY4_CANLF ELL associated factor 2 OS=Canis lupus familiaris OX=9615 GN=EAF2 PE=3 SV=1                                                    | 0.10 | 0.02 | 35.60  | 721015.9  | 1 | 1 | 0 | 0.74  | 543  | 6686  |
| >tr F1Q3S8 F1Q3S8_CANLF Transmembrane protease serine OS=Canis lupus familiaris OX=9615 GN=TMPRSS11A PE=3 SV=3                                                 | 0.27 | 0.27 | 79.60  | 710362.8  | 1 | 1 | 1 | 2.12  | 424  | 1890  |
| >tr E2RRM8 E2RRM8_CANLF Fer-1 like family member 6 OS=Canis lupus familiaris OX=9615 GN=FER1L6 PE=4 SV=3                                                       | 0.14 | 0.14 | 42.00  | 631823.0  | 1 | 1 | 1 | 0.86  | 1868 | 6562  |
| >tr A0A5F4CRU1 A0A5F4CRU1_CANLF Rab interacting lysosomal protein like 1 OS=Canis lupus familiaris OX=9615 GN=RILPL1 PE=4 SV=1                                 | 0.10 | 0.01 | 12.70  | 610615.1  | 2 | 1 | 1 | 1.04  | 385  | 6326  |
| >tr E2RCT1 E2RCT1_CANLF WAP domain-containing protein OS=Canis lupus familiaris OX=9615 PE=4 SV=2                                                              | 1.33 | 1.31 | 221.50 | 548065.3  | 2 | 1 | 0 | 14.66 | 116  | 21717 |

|                                                                                                                                                   |      |      |        |          |   |   |   |       |       |       |
|---------------------------------------------------------------------------------------------------------------------------------------------------|------|------|--------|----------|---|---|---|-------|-------|-------|
| >sp Q28895 NPC2_CANLF NPC intracellular cholesterol transporter 2 OS=Canis lupus familiaris OX=9615 GN=NPC2 PE=2 SV=1                             | 2.24 | 1.19 | 354.10 | 542889.1 | 5 | 2 | 0 | 14.77 | 149   | 153   |
| >tr E2R459 E2R459_CANLF SET domain containing 9 OS=Canis lupus familiaris OX=9615 GN=SETD9 PE=4 SV=1                                              | 0.33 | 0.33 | 14.50  | 537266.0 | 1 | 1 | 0 | 7.02  | 299   | 34855 |
| >tr E2QV77 E2QV77_CANLF SPRY domain containing 4 OS=Canis lupus familiaris OX=9615 GN=SPRYD4 PE=4 SV=2                                            | 0.55 | 0.55 | 71.00  | 511164.3 | 1 | 1 | 0 | 3.94  | 254   | 8010  |
| >tr A0A5F4DCW2 A0A5F4DCW2_CANLF F-box and leucine rich repeat protein 18 OS=Canis lupus familiaris OX=9615 GN=FBXL18 PE=4 SV=1                    | 0.24 | 0.24 | 122.50 | 483286.5 | 1 | 1 | 1 | 1.46  | 756   | 5739  |
| >tr E2R868 E2R868_CANLF [histone H4]-N-methyl-L-lysine20 N-methyltransferase KMT5B OS=Canis lupus familiaris OX=9615 GN=KMT5B PE=4 SV=3           | 0.10 | 0.01 | 23.90  | 477199.3 | 2 | 2 | 1 | 1.13  | 885   | 7704  |
| >sp Q28895 NPC2_CANLF NPC intracellular cholesterol transporter 2 OS=Canis lupus familiaris OX=9615 GN=NPC2 PE=2 SV=1                             | 0.79 | 0.68 | 102.40 | 460040.4 | 2 | 2 | 0 | 14.77 | 149   | 153   |
| >tr E2RI36 E2RI36_CANLF Nuclear transcription factor, X-box binding 1 OS=Canis lupus familiaris OX=9615 GN=NFX1 PE=3 SV=3                         | 0.15 | 0.15 | 6.10   | 429618.9 | 1 | 1 | 1 | 0.98  | 1118  | 13894 |
| >tr A0A5F4BQA2 A0A5F4BQA2_CANLF Dermatan sulfate epimerase OS=Canis lupus familiaris OX=9615 GN=DSE PE=3 SV=1                                     | 0.46 | 0.44 | 73.90  | 420173.8 | 2 | 1 | 0 | 2.60  | 308   | 8924  |
| >tr J9NW59 J9NW59_CANLF Ubiquitin carboxyl-terminal hydrolase OS=Canis lupus familiaris OX=9615 GN=USP33 PE=3 SV=1                                | 0.10 | 0.00 | 14.10  | 393650.1 | 1 | 1 | 1 | 0.55  | 912   | 4415  |
| >tr E2RPZ0 E2RPZ0_CANLF Opsin 5 OS=Canis lupus familiaris OX=9615 GN=OPN5 PE=3 SV=3                                                               | 0.10 | 0.07 | 13.10  | 385548.4 | 2 | 2 | 2 | 1.32  | 380   | 875   |
| >tr A0A5F4D105 A0A5F4D105_CANLF Amyloid beta precursor protein binding family A member 1 OS=Canis lupus familiaris OX=9615 GN=APBA1 PE=4 SV=1     | 0.10 | 0.10 | 50.40  | 358932.2 | 1 | 1 | 0 | 0.56  | 889   | 3602  |
| >tr A0A5F4BZW4 A0A5F4BZW4_CANLF Malonyl-CoA decarboxylase OS=Canis lupus familiaris OX=9615 GN=MLYCD PE=4 SV=1                                    | 0.19 | 0.19 | 40.90  | 355115.0 | 1 | 1 | 1 | 5.42  | 461   | 4809  |
| >tr A0A5F4CCD0 A0A5F4CCD0_CANLF Cysteine rich secretory protein 2 OS=Canis lupus familiaris OX=9615 GN=CRISP2 PE=3 SV=1                           | 0.89 | 0.84 | 177.50 | 351994.1 | 4 | 1 | 0 | 4.82  | 311   | 11017 |
| >tr A0A5F4CBG5 A0A5F4CBG5_CANLF Ubiquitin specific peptidase 47 OS=Canis lupus familiaris OX=9615 GN=USP47 PE=4 SV=1                              | 0.58 | 0.54 | 102.80 | 350029.6 | 3 | 1 | 0 | 1.62  | 1299  | 1284  |
| >tr A0A5F4D9S5 A0A5F4D9S5_CANLF Hyaluronoglucosaminidase OS=Canis lupus familiaris OX=9615 GN=CEMIP PE=3 SV=1                                     | 0.59 | 0.59 | 158.60 | 335957.8 | 1 | 1 | 0 | 0.24  | 1684  | 9775  |
| >tr F1P9Y3 F1P9Y3_CANLF Complex I-30kD OS=Canis lupus familiaris OX=9615 GN=NDUFS3 PE=3 SV=2                                                      | 0.40 | 0.40 | 135.20 | 328949.1 | 1 | 1 | 0 | 4.04  | 322   | 18622 |
| >tr A0A5F4C854 A0A5F4C854_CANLF Proline-serine-threonine phosphatase interacting protein 1 OS=Canis lupus familiaris OX=9615 GN=PSTPIP1 PE=4 SV=1 | 0.21 | 0.21 | 55.20  | 319542.4 | 1 | 1 | 0 | 3.55  | 141   | 9178  |
| >sp E2QRY6 NNRE_CANLF NAD(P)H-hydrate epimerase OS=Canis lupus familiaris OX=9615 GN=NAXE PE=3 SV=1                                               | 0.55 | 0.55 | 42.40  | 310792.8 | 1 | 1 | 0 | 1.74  | 288   | 159   |
| >tr A0A5F4CW80 A0A5F4CW80_CANLF Sorbin and SH3 domain containing 1 OS=Canis lupus familiaris OX=9615 GN=SORBS1 PE=4 SV=1                          | 0.26 | 0.26 | 19.40  | 307126.6 | 1 | 1 | 1 | 1.15  | 1303  | 30514 |
| >tr A0A5F4BUH7 A0A5F4BUH7_CANLF NADPH:adrenodoxin oxidoreductase, mitochondrial OS=Canis lupus familiaris OX=9615 GN=FDXR PE=3 SV=1               | 0.10 | 0.00 | 17.60  | 301631.0 | 3 | 1 | 1 | 0.89  | 451   | 5995  |
| >tr A0A5F4DHQ7 A0A5F4DHQ7_CANLF UDP-glucuronate decarboxylase 1 OS=Canis lupus familiaris OX=9615 GN=UXS1 PE=3 SV=1                               | 0.21 | 0.19 | 25.40  | 281323.2 | 2 | 2 | 2 | 7.73  | 401   | 22885 |
| >tr A0A5F4BU36 A0A5F4BU36_CANLF Titin OS=Canis lupus familiaris OX=9615 GN=TTN PE=3 SV=1                                                          | 0.52 | 0.54 | 42.20  | 273602.7 | 1 | 1 | 0 | 0.08  | 27097 | 33785 |

|                                                                                                                                   |      |      |        |          |   |   |   |       |      |       |
|-----------------------------------------------------------------------------------------------------------------------------------|------|------|--------|----------|---|---|---|-------|------|-------|
| >tr A0A5F4DA89 A0A5F4DA89_CANLF Sorting nexin 25 OS=Canis lupus familiaris OX=9615 GN=SNX25 PE=3 SV=1                             | 0.40 | 0.41 | 70.90  | 267500.8 | 1 | 1 | 1 | 1.37  | 950  | 8417  |
| >tr E2RRM5 E2RRM5_CANLF Ras interacting protein 1 OS=Canis lupus familiaris OX=9615 GN=RASIP1 PE=4 SV=3                           | 0.16 | 0.16 | 33.90  | 265549.4 | 1 | 1 | 0 | 0.62  | 1137 | 25466 |
| >tr J9P6K3 J9P6K3_CANLF PHD finger protein 2 OS=Canis lupus familiaris OX=9615 GN=PHF2 PE=4 SV=1                                  | 0.20 | 0.16 | 97.70  | 265542.8 | 3 | 1 | 1 | 1.28  | 1096 | 24614 |
| >tr E2QT82 E2QT82_CANLF Proteasome inhibitor PI31 subunit OS=Canis lupus familiaris OX=9615 GN=PSMF1 PE=3 SV=1                    | 0.19 | 0.19 | 11.10  | 248517.3 | 1 | 1 | 1 | 8.86  | 271  | 11472 |
| >tr E2RFA3 E2RFA3_CANLF RNA helicase OS=Canis lupus familiaris OX=9615 GN=DDX18 PE=3 SV=2                                         | 0.82 | 0.82 | 112.10 | 245821.5 | 1 | 1 | 0 | 3.44  | 669  | 32049 |
| >tr A0A5F4CNT4 A0A5F4CNT4_CANLF Microtubule actin crosslinking factor 1 OS=Canis lupus familiaris OX=9615 GN=MACF1 PE=4 SV=1      | 0.11 | 0.12 | 59.50  | 242137.8 | 1 | 1 | 0 | 0.19  | 7352 | 1251  |
| >tr F1PDT8 F1PDT8_CANLF WAP four-disulfide core domain protein 2 OS=Canis lupus familiaris OX=9615 GN=WFDC2 PE=4 SV=3             | 0.90 | 0.90 | 58.00  | 239930.0 | 1 | 1 | 0 | 29.09 | 110  | 33116 |
| >tr E2QUV3 E2QUV3_CANLF Alpha-2-HS-glycoprotein OS=Canis lupus familiaris OX=9615 GN=AHSG PE=4 SV=2                               | 1.19 | 1.17 | 201.70 | 235428.2 | 2 | 1 | 0 | 5.48  | 365  | 20747 |
| >tr A0A5F4DJ73 A0A5F4DJ73_CANLF Proline and serine rich coiled-coil 1 OS=Canis lupus familiaris OX=9615 GN=PSRC1 PE=4 SV=1        | 0.38 | 0.38 | 22.10  | 226854.1 | 1 | 1 | 0 | 4.93  | 345  | 1871  |
| >tr J9P2M6 J9P2M6_CANLF MSS51 mitochondrial translational activator OS=Canis lupus familiaris OX=9615 GN=MSS51 PE=4 SV=2          | 0.18 | 0.16 | 20.80  | 223042.7 | 2 | 1 | 1 | 2.41  | 457  | 41081 |
| >tr A0A5F4C739 A0A5F4C739_CANLF Rho guanine nucleotide exchange factor 15 OS=Canis lupus familiaris OX=9615 GN=ARHGEF15 PE=4 SV=1 | 0.23 | 0.23 | 6.30   | 218234.1 | 1 | 1 | 0 | 2.37  | 885  | 14702 |
| >tr J9P3D0 J9P3D0_CANLF Solute carrier family 4 member 9 OS=Canis lupus familiaris OX=9615 GN=SLC4A9 PE=3 SV=2                    | 0.47 | 0.47 | 76.40  | 177288.7 | 1 | 1 | 0 | 1.12  | 893  | 31921 |
| >sp E2QY99 MPP5_CANLF MAGUK p55 subfamily member 5 OS=Canis lupus familiaris OX=9615 GN=MPP5 PE=1 SV=1                            | 0.19 | 0.19 | 64.50  | 175268.7 | 1 | 1 | 1 | 2.22  | 675  | 246   |
| >tr A0A5F4DG16 A0A5F4DG16_CANLF Myosin XVIIIa OS=Canis lupus familiaris OX=9615 GN=MYO18A PE=3 SV=1                               | 0.41 | 0.41 | 74.30  | 162216.5 | 1 | 1 | 0 | 0.45  | 2426 | 21190 |
| >tr A0A5F4CLN6 A0A5F4CLN6_CANLF DLG associated protein 4 OS=Canis lupus familiaris OX=9615 GN=DLGAP4 PE=3 SV=1                    | 0.43 | 0.43 | 69.40  | 139918.9 | 1 | 1 | 0 | 3.04  | 461  | 7940  |
| >tr F1PGQ6 F1PGQ6_CANLF Septin OS=Canis lupus familiaris OX=9615 GN=SEPTIN1 PE=3 SV=3                                             | 0.42 | 0.42 | 20.70  | 134677.7 | 1 | 1 | 1 | 4.34  | 369  | 22386 |
| >tr J9P5T2 J9P5T2_CANLF Non-specific serine/threonine protein kinase OS=Canis lupus familiaris OX=9615 GN=WNK3 PE=4 SV=2          | 0.10 | 0.00 | 9.10   | 127769.0 | 1 | 1 | 0 | 0.22  | 2294 | 5229  |
| >tr A0A5F4DDF1 A0A5F4DDF1_CANLF DDB1- and CUL4-associated factor 10 OS=Canis lupus familiaris OX=9615 GN=DCAF10 PE=3 SV=1         | 0.88 | 0.88 | 49.90  | 122484.2 | 1 | 1 | 0 | 2.66  | 526  | 2777  |
| >tr E2R0D7 E2R0D7_CANLF Collagen type VI alpha 6 chain OS=Canis lupus familiaris OX=9615 GN=COL6A6 PE=4 SV=2                      | 0.23 | 0.24 | 46.80  | 122484.2 | 1 | 1 | 0 | 0.62  | 2268 | 14682 |
| >tr A0A5F4CCD0 A0A5F4CCD0_CANLF Cysteine rich secretory protein 2 OS=Canis lupus familiaris OX=9615 GN=CRISP2 PE=3 SV=1           | 0.64 | 0.64 | 109.90 | 117327.5 | 1 | 1 | 0 | 4.82  | 311  | 11017 |
| >tr F1Q3Q6 F1Q3Q6_CANLF Secernin 1 OS=Canis lupus familiaris OX=9615 GN=SCRN1 PE=3 SV=2                                           | 0.10 | 0.01 | 55.90  | 108714.0 | 1 | 1 | 1 | 3.65  | 438  | 38892 |
| >tr J9P816 J9P816_CANLF E3 ubiquitin-protein transferase MAEA OS=Canis lupus familiaris OX=9615 GN=MAEA PE=4 SV=2                 | 0.10 | 0.00 | 31.30  | 104483.4 | 1 | 1 | 1 | 1.41  | 355  | 1538  |

|                                                                                                                                      |      |      |        |          |   |   |   |      |      |       |
|--------------------------------------------------------------------------------------------------------------------------------------|------|------|--------|----------|---|---|---|------|------|-------|
| >tr A0A5F4CB90 A0A5F4CB90_CANLF Nuclear cap-binding protein subunit 2 OS=Canis lupus familiaris OX=9615 PE=3 SV=1                    | 0.58 | 0.58 | 48.10  | 102484.5 | 1 | 1 | 0 | 4.52 | 155  | 44031 |
| >tr F1PA94 F1PA94_CANLF FRY like transcription coactivator OS=Canis lupus familiaris OX=9615 GN=FRYL PE=4 SV=3                       | 1.05 | 1.05 | 61.20  | 97525.8  | 1 | 1 | 0 | 0.30 | 3014 | 11447 |
| >tr J9P494 J9P494_CANLF SH3 domain-containing protein OS=Canis lupus familiaris OX=9615 GN=NEB PE=4 SV=2                             | 0.28 | 0.29 | 12.00  | 90598.5  | 1 | 1 | 0 | 0.17 | 6526 | 2878  |
| >tr A0A5F4D463 A0A5F4D463_CANLF Roundabout guidance receptor 1 OS=Canis lupus familiaris OX=9615 GN=ROBO1 PE=4 SV=1                  | 0.22 | 0.22 | 37.70  | 89484.8  | 1 | 1 | 0 | 1.42 | 1691 | 5706  |
| >tr A0A5F4C4P0 A0A5F4C4P0_CANLF Zinc finger FYVE domain-containing protein 26 OS=Canis lupus familiaris OX=9615 GN=ZFYVE26 PE=4 SV=1 | 0.24 | 0.24 | 37.20  | 88482.3  | 1 | 1 | 0 | 0.43 | 2339 | 3561  |
| >tr F1PFD6 F1PFD6_CANLF Teneurin transmembrane protein 4 OS=Canis lupus familiaris OX=9615 GN=TENM4 PE=3 SV=3                        | 0.55 | 0.55 | 34.80  | 74097.8  | 1 | 1 | 0 | 0.32 | 2852 | 5565  |
| >tr E2R6E0 E2R6E0_CANLF Lipocln_cytosolic_FA-bd_dom domain-containing protein OS=Canis lupus familiaris OX=9615 GN=LCNL1 PE=3 SV=2   | 1.03 | 1.03 | 113.50 | 73419.6  | 1 | 1 | 0 | 3.34 | 299  | 1932  |
| >tr A0A5F4C7I9 A0A5F4C7I9_CANLF Ubiquitin specific peptidase 34 OS=Canis lupus familiaris OX=9615 GN=USP34 PE=4 SV=1                 | 0.10 | 0.00 | 25.80  | 73019.5  | 1 | 1 | 1 | 0.14 | 3682 | 1536  |
